# Supplementary material for: Enantioselective 1,4-addition of diarylphosphine oxides to α,β-unsaturated ketones catalyzed by oxazaborolidines
Source: Royal Society of Chemistry journal article supplement (doi:10.1039/d3qo01178j), 2023-01-01
Supplement: d3qo01178j1.pdf [file d3qo01178j1.pdf]

## Supporting Information

### **Enantioselective 1,4-addition of diarylphosphine oxides to $\alpha,\beta$ -unsaturated ketones catalyzed by oxazaborolidines**

Jinyi Qian,<sup>+[b]</sup> Hengyuan Zhao,<sup>+[a]</sup> Qi Gao,<sup>[b]</sup> Lirong Chen,<sup>[b]</sup> Yinrui Shi,<sup>[b]</sup> Jiuling Li,<sup>[a]</sup> Yafei Guo,<sup>\*[a]</sup> and Baomin Fan<sup>\*[a,b]</sup>

<sup>[a]</sup> School of Chemistry & Environment, Key Laboratory of Advanced Synthetic Chemistry (Yunnan Minzu University) State Ethnic Affairs Commission, Yunnan Minzu University, Kunming 650500, China

<sup>[b]</sup> Key Laboratory of Chemistry in Ethnic Medicinal Resources, State Ethnic Affairs Commission & Ministry of Education, Yunnan Minzu University, Kunming 650500, China

Email: [gyfwin@sina.com](mailto:gyfwin@sina.com); [fanbaomin1979@163.com](mailto:fanbaomin1979@163.com)

[+] These authors contributed equally to this work.

|                                                                           |    |
|---------------------------------------------------------------------------|----|
| 1. General experimental information                                       | 2  |
| 2. General procedures for asymmetric transformations                      | 2  |
| 3. General procedure for synthesis of $\alpha,\beta$ -unsaturated ketones | 57 |
| 4. Conversion of Chiral phosphine compounds                               | 66 |
| 5. Determination of absolute configuration                                | 72 |
| 6. Calculation Detail and Atom Coordination                               | 73 |
| 7. References                                                             | 98 |

## 1. General experimental information

All reactions were carried out with anhydrous solvents (*vide infra*) under a nitrogen atmosphere using oven-dried glassware and standard Schlenk techniques. Reactions were monitored by  $^1\text{H}$  NMR. Purification of the products was performed by column chromatography using Merck 60 Å 200-300 mesh silica gel. Components were visualized by UV and  $\text{KMnO}_4$  staining (TLC). NMR data was collected on Bruker-Avance 400 MHz spectrometer ( $^1\text{H}$  at 400.0 MHz;  $^{13}\text{C}$  at 100.58 MHz,  $^{31}\text{P}$  at 162 MHz). Chemical shifts are reported in parts per million (ppm) relative to residual solvent peak ( $\text{CDCl}_3$ ,  $^1\text{H}$ : 7.26 ppm;  $^{13}\text{C}$ : 77.16 ppm). Coupling constants are reported in Hertz. Multiplicity is reported with the usual abbreviations. Enantiomeric excess (*ee*) were determined by chiral HPLC analysis using a Agilent HPLC (1260). High resolution mass spectra (HRMS) were performed on a VG Autospec-3000 spectrometer with ESI ionization.

Unless otherwise indicated, reagents and substrates (**1a**, **1b**, **1o**, **1q**, **1r**, **1v**, **1aa**, **1ac**, **1ad**, **1af**, **1ag**, **1ah**, **1ao**, **1ag**, **1ar**, **1au**, **1av**, **1aw**) were purchased from commercial sources and used as received. Solvents not required to be dry were purchased as technical grade and used as received. Dry solvents were freshly collected from a dry solvent purification system prior to use. Inert atmosphere experiments were performed with standard Schlenk techniques. All new compounds were fully characterized by  $^1\text{H}$  and  $^{13}\text{C}$ ,  $^{31}\text{P}$  NMR and HRMS techniques.

## 2. General procedures for asymmetric transformations

**Asymmetric addition of aryl phosphate oxygen to  $\alpha,\beta$ -unsaturated ketones catalyzed by chiral oxazaborane** : In an argon-filled glove box, methylboronic acid (2.4 mg, 0.04 mmol) and (*S*)- $\alpha,\alpha$ -Bis[3,5-bis(trifluoromethyl)phenyl]-2-pyrrolidinemethanol (25.2 mg, 0.048 mmol) were added to a dry Schlenk tube equipped with magnetic stirring bar, followed by addition of toluene (2 mL) and stirred under nitrogen atmosphere for 17 h at 120°C.<sup>[1]</sup> Then (*2E*)-1,3-Diphenyl-2-propen-1-one (0.24 mmol, 1.2 equiv.) and diphenylphosphine oxide (0.2 mmol, 1 equiv) were added to the tube and stirred under nitrogen atmosphere for 3 h at room temperature (18-25°C). After that solvent was evaporated on rotary evaporator and the crude was purified by flash chromatography on silica gel.

**General procedure for the preparation of racemic products**: A sealed tube with a magnetic stir bar was charged with  $\alpha,\beta$ -unsaturated ketones (0.24 mmol), diarylphosphine oxides (0.2 mmol) in Toluene (2 mL) and stirred at room temperature for 12 h. After that, the solvent was evaporated under reduced pressure and further purified by column chromatography on silica gel to afford racemic **3** (Yields: 85-99%).

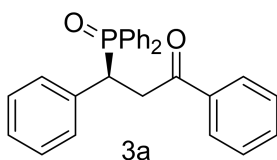

**(S)-3-(Diphenylphosphinyl)-1,3-diphenylpropan-1-one (3a)<sup>[2]</sup>**

[Purification by flash column chromatography on silica gel (eluent, DCM: MeOH = 70:1). White solid, 92% yield, 98% ee] <sup>1</sup>H NMR (400 MHz, Chloroform-*d*) δ 8.03 – 7.93 (m, 2H), 7.87 – 7.80 (m, 2H), 7.54 – 7.40 (m, 6H), 7.40 – 7.30 (m, 5H), 7.26 – 7.20 (m, 2H), 7.17 – 7.08 (m, 3H), 4.46 (ddd, *J* = 10.5, 6.8, 2.4 Hz, 1H), 4.03 (ddd, *J* = 18.2, 10.4, 4.3 Hz, 1H), 3.37 (ddd, *J* = 18.2, 11.2, 2.4 Hz, 1H).

<sup>13</sup>C NMR (101 MHz, Chloroform-*d*) δ 196.68, 136.32, 135.88, 133.42, 132.09, 131.80, 131.46, 131.31, 131.05, 130.89, 129.85, 128.99, 128.59, 128.33, 128.15, 128.05, 127.09, 41.01, 38.99.

<sup>31</sup>P NMR (162 MHz, Chloroform-*d*) δ 34.25.

HRMS (ESI<sup>+</sup>, *m/z*): calcd for C<sub>27</sub>H<sub>24</sub>O<sub>2</sub>P [M+H]<sup>+</sup>: 411.1436, found: 411.1437.

HPLC analysis: Chiracel-ODH, n-heptane/*i*-PrOH =90:10, 1 mL/min, 22°C, detection at 254nm. Retention time (min): 9.01 (major) and 12.98 (minor).

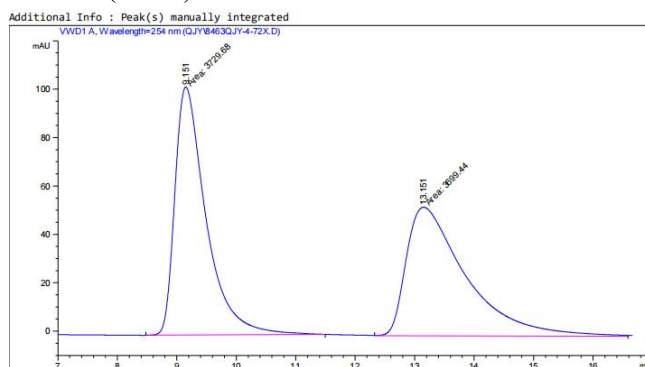

| Peak # | RetTime [min] | Type | Width [min] | Area [mAU*s] | Height [mAU] | Area %  |
|--------|---------------|------|-------------|--------------|--------------|---------|
| 1      | 9.151         | MM   | 0.6065      | 3729.68457   | 102.48717    | 50.2036 |
| 2      | 13.151        | MM   | 1.1594      | 3699.43774   | 53.17957     | 49.7964 |

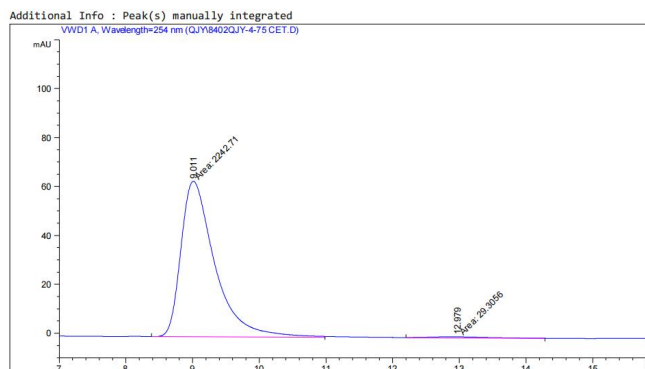

| Peak # | RetTime [min] | Type | Width [min] | Area [mAU*s] | Height [mAU] | Area %  |
|--------|---------------|------|-------------|--------------|--------------|---------|
| 1      | 9.011         | MF   | 0.5881      | 2242.70898   | 63.55553     | 98.7102 |
| 2      | 12.979        | MM   | 1.1005      | 29.30556     | 4.43817e-1   | 1.2898  |

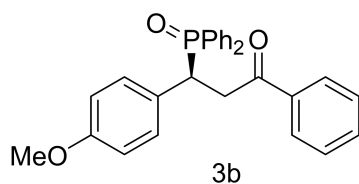

**(S)-3-(diphenylphosphoryl)-3-(4-methoxyphenyl)-1-phenylpropan-1-one (3b)<sup>[2]</sup>**

[Purification by flash column chromatography on silica gel (eluent, DCM: MeOH= 70:1). White solid , 81% yield, 97% ee] <sup>1</sup>H NMR (400 MHz, Chloroform-*d*) δ 8.06 – 7.94 (m, 2H), 7.89 – 7.81 (m, 2H), 7.56 – 7.46 (m, 7H), 7.43 – 7.24 (m, 6H), 6.71 (d, *J* = 8.7 Hz, 2H), 4.46 (ddd, *J* = 10.6, 6.9, 2.4 Hz, 1H), 4.00 (ddd, *J* = 18.0, 10.5, 4.2 Hz, 1H), 3.70 (s, 3H), 3.36 (ddd, *J* = 18.0, 10.8, 2.4 Hz, 1H).

<sup>13</sup>C NMR (101 MHz, Chloroform-*d*) δ 196.76, 158.48, 136.29, 133.34, 132.00, 131.42, 131.20, 130.92, 130.80, 128.92, 128.51, 128.15, 128.06, 127.58, 113.72, 55.03, 40.03, 38.98.

<sup>31</sup>P NMR (162 MHz, Chloroform-*d*) δ 34.20.

HRMS (ESI<sup>+</sup>, *m/z*): calcd for C<sub>28</sub>H<sub>26</sub>O<sub>3</sub>P [M+H]<sup>+</sup> : 441.1614, found 441.1620.

HPLC analysis: Chiracel-ODH, n-heptane/*i*-PrOH= 90:10, 1 mL/min, 22°C, detection at 254nm. Retention time (min): 10.03 (major) and 14.47 (minor).

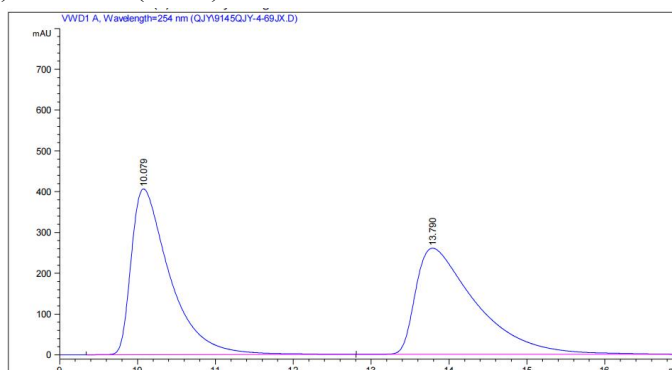

| Peak # | RetTime [min] | Type | Width [min] | Area [mAU*s] | Height [mAU] | Area %  |
|--------|---------------|------|-------------|--------------|--------------|---------|
| 1      | 10.079        | BB   | 0.5099      | 1.39972e4    | 406.34793    | 49.8162 |
| 2      | 13.790        | BB   | 0.7938      | 1.41005e4    | 260.35846    | 50.1838 |

Additional Info : Peak(s) manually integrated

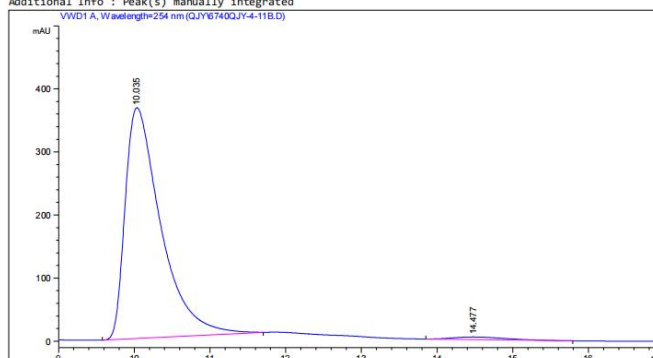

| Peak # | RetTime [min] | Type | Width [min] | Area [mAU*s] | Height [mAU] | Area %  |
|--------|---------------|------|-------------|--------------|--------------|---------|
| 1      | 10.035        | BB   | 0.4891      | 1.19824e4    | 365.84406    | 98.3428 |
| 2      | 14.477        | BB   | 0.7296      | 201.92178    | 4.17207      | 1.6572  |

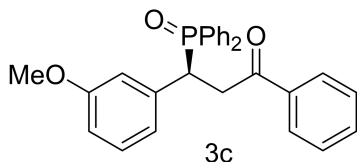

**(S)-3-(diphenylphosphoryl)-3-(3-methoxyphenyl)-1-phenylpropan-1-one(3c)**

[Purification by flash column chromatography on silica gel (eluent, DCM: MeOH= 70:1). White solid , 86% yield, 97% ee] <sup>1</sup>H NMR (400 MHz, Chloroform-*d*) δ 7.94 – 7.88 (m, 2H), 7.61 – 7.53 (m, 2H), 7.46 – 7.44 (m, 3H), 7.42 – 7.32 (m, 2H), 7.32 – 7.29 (m, 2H), 7.26 – 7.20 (m, 2H), 7.20 – 7.13 (m, 3H), 7.11 – 6.97 (m, 3H), 4.40 (m, 1H), 3.96 (ddd, *J* = 18.2, 10.5, 4.1 Hz, 1H), 3.28 (ddd, *J* = 18.1, 11.2, 2.3 Hz, 1H), 2.25(s, 3H).

<sup>13</sup>C NMR (101 MHz, Chloroform-*d*) δ 195.69 (d, *J* = 13.4 Hz), 137.34, 135.26, 134.84 (d, *J* = 5.6 Hz), 133.08, 131.01 (d, *J* = 2.9 Hz), 130.38 (d, *J* = 2.8 Hz), 130.22 (d, *J* = 8.4 Hz), 129.88 (d, *J* = 8.9 Hz), 128.79 (d, *J* = 5.7 Hz), 127.96 (d, *J* = 4.0 Hz), 127.84 (d, *J* = 5.7 Hz), 127.69, 127.40, 127.25 (d, *J* = 1.9 Hz), 127.03 (d, *J* = 11.8 Hz), 126.00 (d, *J* = 2.5 Hz), 124.20, 39.89 (d, *J* = 69.3 Hz), 37.97, 20.18.

<sup>31</sup>P NMR (162 MHz, Chloroform-*d*) δ 34.51.

HRMS (ESI+, *m/z*): calcd for C<sub>28</sub>H<sub>26</sub>O<sub>3</sub>P [M+H]<sup>+</sup>: 441.1614 , found 441.1613 .

HPLC analysis: Chiracel-ODH, n-heptane/*i*-PrOH =90:10, 1 mL/min, 22°C, detection at 254nm. Retention time (min): 9.57 (major) and 13.67 (minor).

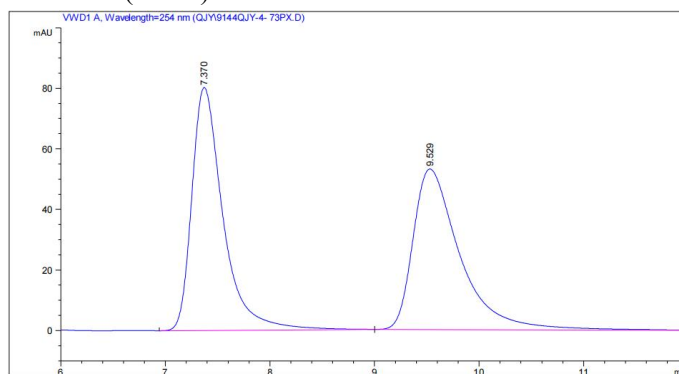

| Peak # | RetTime [min] | Type | Width [min] | Area [mAU*s] | Height [mAU] | Area %  |
|--------|---------------|------|-------------|--------------|--------------|---------|
| 1      | 7.370         | BB   | 0.3120      | 1663.73633   | 80.22320     | 50.0947 |
| 2      | 9.529         | BB   | 0.4657      | 1657.44702   | 53.02517     | 49.9053 |

Additional Info : Peak(s) manually integrated

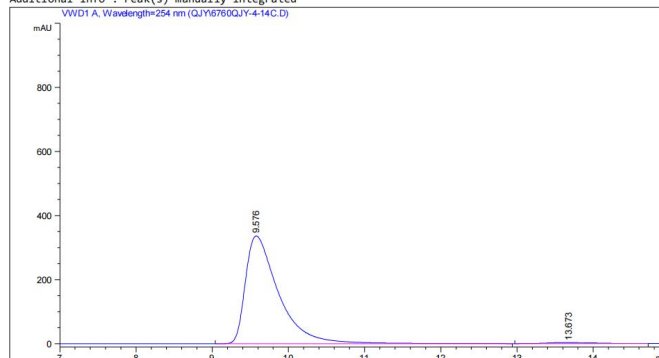

| Peak # | RetTime [min] | Type | Width [min] | Area [mAU*s] | Height [mAU] | Area %  |
|--------|---------------|------|-------------|--------------|--------------|---------|
| 1      | 9.576         | BB   | 0.4486      | 1.01539e4    | 336.00714    | 98.6069 |
| 2      | 13.673        | BB   | 0.6366      | 143.45723    | 3.33655      | 1.3931  |

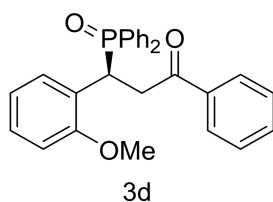

**(S)-3-(diphenylphosphoryl)-3-(2-methoxyphenyl)-1-phenylpropan-1-one(3d)<sup>[2]</sup>**

[Purification by flash column chromatography on silica gel (eluent, DCM: MeOH= 70:1). White solid , 95% yield, 99% ee] **<sup>1</sup>H NMR** (400 MHz, Chloroform-*d*)  $\delta$  8.08 – 7.99 (m, 2H), 7.88 – 7.82 (m, 2H), 7.63 (dt, *J* = 7.7, 2.1 Hz, 1H), 7.55 – 7.49 (m, 3H), 7.49 – 7.33 (m, 5H), 7.33 – 7.26 (m, 1H), 7.18 (td, *J* = 7.7, 3.1 Hz, 2H), 7.11 – 7.04 (m, 1H), 6.90 (t, *J* = 7.7 Hz, 1H), 6.54 (d, *J* = 8.2 Hz, 1H), 5.14 (ddd, *J* = 10.5, 7.2, 2.9 Hz, 1H), 4.06 (ddd, *J* = 18.1, 10.7, 5.4 Hz, 1H), 3.46 (s, 3H), 3.39 (ddd, *J* = 18.0, 10.1, 2.9 Hz, 1H).

**<sup>13</sup>C NMR** (101 MHz, Chloroform-*d*)  $\delta$  196.80 (d, *J* = 13.6 Hz), 156.71 (d, *J* = 5.6 Hz), 136.44, 133.23, 132.02 (d, *J* = 2.7 Hz), 131.46 (d, *J* = 8.5 Hz), 131.17 (d, *J* = 2.8 Hz), 131.02, 130.94 (d, *J* = 3.1 Hz), 128.96 (d, *J* = 3.6 Hz), 128.83, 128.52, 128.16 (d, *J* = 3.6 Hz), 127.51 (d, *J* = 11.8 Hz), 124.18 (d, *J* = 5.9 Hz), 120.70 (d, *J* = 2.8 Hz), 110.24 (d, *J* = 2.3 Hz), 55.27, 38.10, 32.34 (d, *J* = 69.1 Hz).

**<sup>31</sup>P NMR** (162 MHz, Chloroform-*d*)  $\delta$  34.12.

HRMS (ESI<sup>+</sup>, *m/z*): calcd for C<sub>28</sub>H<sub>26</sub>O<sub>3</sub>P [M+H]<sup>+</sup> : 441.1614, found 441.1616.

HPLC analysis: Chiracel-ODH, n-heptane/*i*-PrOH =90:10, 1 mL/min, 22°C, detection at 254nm. Retention time (min): 9.23 (major) and 11.98 (minor).

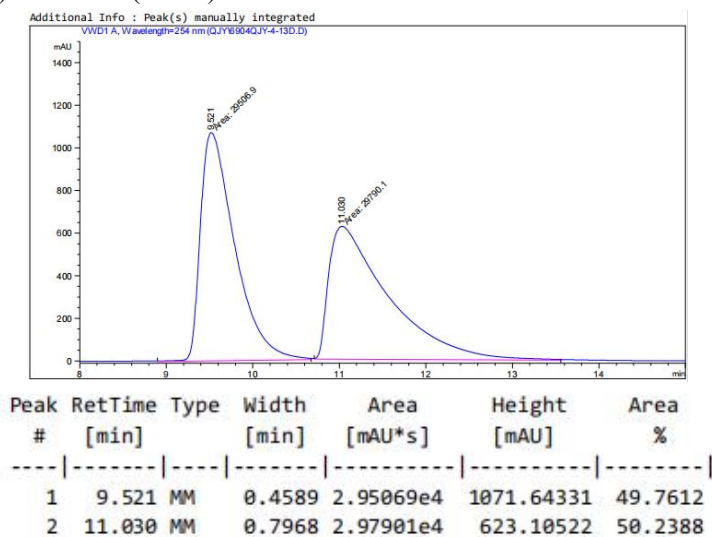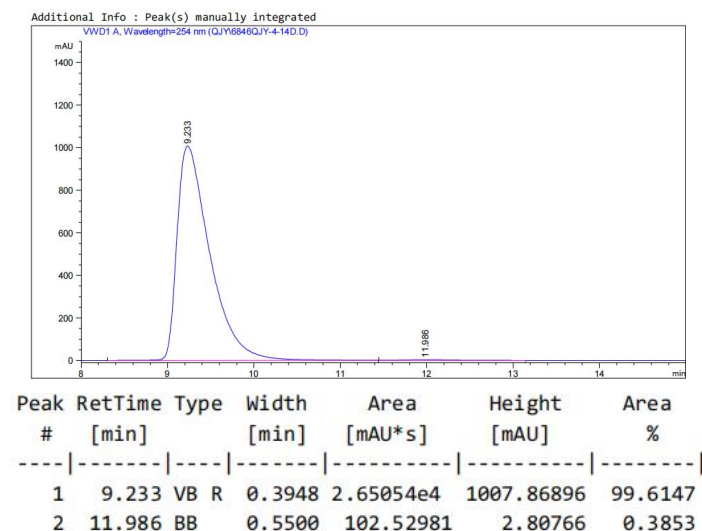

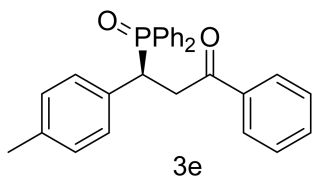

**(S)-3-(diphenylphosphoryl)-1-phenyl-3-(p-tolyl)propan-1-one (3e)**

[Purification by flash column chromatography on silica gel (eluent, DCM: MeOH= 70:1). White solid , 87% yield, 97% ee]<sup>1</sup>H NMR (400 MHz, Chloroform-*d*) δ 8.01 – 7.94 (m, 2H), 7.86 – 7.81 (m, 2H), 7.49 (m, 6H), 7.39 – 7.32 (m, 3H), 7.29 – 7.24 (m, 4H), 6.95 (d, *J* = 7.8 Hz, 2H), 4.46 (ddd, *J* = 9.8, 6.9, 2.4 Hz, 1H), 4.00 (ddd, *J* = 18.1, 10.4, 4.4 Hz, 1H), 3.36 (ddd, *J* = 18.1, 11.1, 2.4 Hz, 1H), 2.19 (s, 3H).

<sup>13</sup>C NMR (101 MHz, Chloroform-*d*) δ 196.74 (d, *J* = 13.5 Hz), 136.66 (d, *J* = 2.5 Hz), 136.36, 133.37, 132.63 (d, *J* = 6.2 Hz), 132.08 (d, *J* = 8.5 Hz), 131.98 (d, *J* = 6.5 Hz), 131.45 (d, *J* = 2.7 Hz), 131.27 (d, *J* = 8.5 Hz), 131.07, 130.98, 130.75 (d, *J* = 11.6 Hz), 129.67 (d, *J* = 5.6 Hz), 129.07 (d, *J* = 2.0 Hz), 129.01, 128.90, 128.56, 128.16 (d, *J* = 3.6 Hz), 128.06, 40.50 (d, *J* = 69.5 Hz), 39.01, 21.06.

<sup>31</sup>P NMR (162 MHz, Chloroform-*d*) δ 34.57.

HRMS (ESI+, *m/z*): calcd for C<sub>28</sub>H<sub>26</sub>O<sub>2</sub>P [M+H]<sup>+</sup>: 425.1615, found: 425.1616.

HPLC analysis: Chiracel-ODH, n-heptane/*i*-PrOH =90:10, 1 mL/min, 22°C, detection at 254nm. Retention time (min): 7.19 (major) and 12.30 (minor).

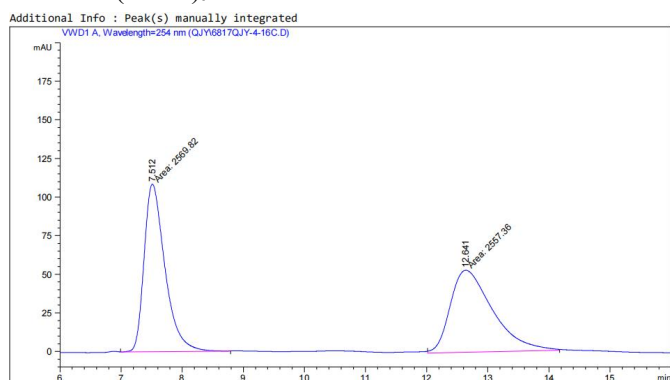

| Peak # | RetTime [min] | Type | Width [min] | Area [mAU*s] | Height [mAU] | Area %  |
|--------|---------------|------|-------------|--------------|--------------|---------|
| 1      | 7.512         | MM   | 0.3949      | 2569.81934   | 108.45287    | 50.1215 |
| 2      | 12.641        | MM   | 0.8032      | 2557.35864   | 53.06885     | 49.8785 |

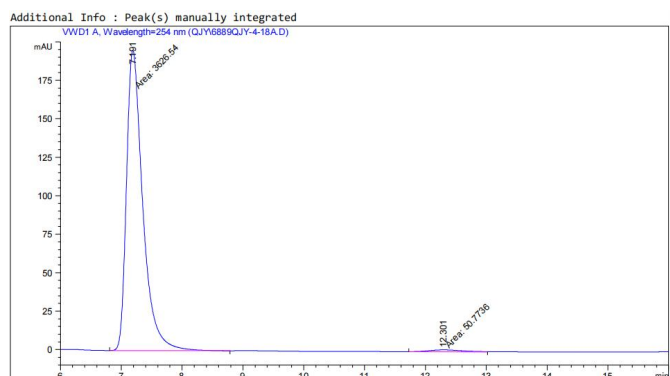

| Peak # | RetTime [min] | Type | Width [min] | Area [mAU*s] | Height [mAU] | Area %  |
|--------|---------------|------|-------------|--------------|--------------|---------|
| 1      | 7.191         | MM   | 0.3097      | 3626.53564   | 195.16879    | 98.6193 |
| 2      | 12.301        | MM   | 0.6518      | 50.77361     | 1.29835      | 1.3807  |



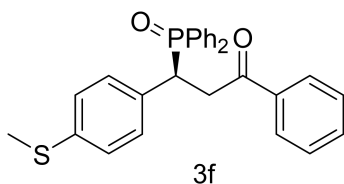

**(S)-3-(diphenylphosphoryl)-3-(4-(methylthio)phenyl)-1-phenylpropan-1-one(3f)**

[Purification by flash column chromatography on silica gel (eluent, DCM: MeOH= 70:1). White solid , 94% yield, 98% ee] <sup>1</sup>H NMR (400 MHz, Chloroform-*d*) δ 8.00 – 7.93 (m, 2H), 7.87 – 7.82 (m, 2H), 7.55 – 7.45 (m, 6H), 7.41 – 7.34 (m, 3H), 7.33 – 7.24 (m, 4H), 7.03 (d, *J* = 8.3 Hz, 2H), 4.44 (ddd, *J* = 10.5, 6.8, 2.4 Hz, 1H), 3.99 (ddd, *J* = 18.2, 10.6, 4.2 Hz, 1H), 3.34 (ddd, *J* = 18.2, 10.8, 2.3 Hz, 1H), 2.37 (s, 3H).

<sup>13</sup>C NMR (101 MHz, Chloroform-*d*) δ 196.62 (d, *J* = 13.5 Hz), 137.11 (d, *J* = 2.8 Hz), 136.27, 133.48, 132.63 (d, *J* = 5.8 Hz), 132.09 (d, *J* = 2.8 Hz), 131.82, 131.56 (d, *J* = 2.9 Hz), 131.28, 131.20, 131.00, 130.91, 130.88, 130.26, 130.20, 129.06, 128.95, 128.61, 128.29, 128.17, 128.13, 126.32 (d, *J* = 1.9 Hz), 40.46 (d, *J* = 69.3 Hz), 38.97, 15.63.

<sup>31</sup>P NMR (162 MHz, Chloroform-*d*) δ 34.35.

HRMS (ESI+, *m/z*): calcd for C<sub>28</sub>H<sub>26</sub>O<sub>2</sub>PS [M+H]<sup>+</sup> : 457.1386, found: 457.1390.

HPLC analysis: Chiracel-ODH, n-heptane/*i*-PrOH =90:10, 1 mL/min, 22°C, detection at 254nm. Retention time (min): 9.94 (major) and 13.81 (minor).

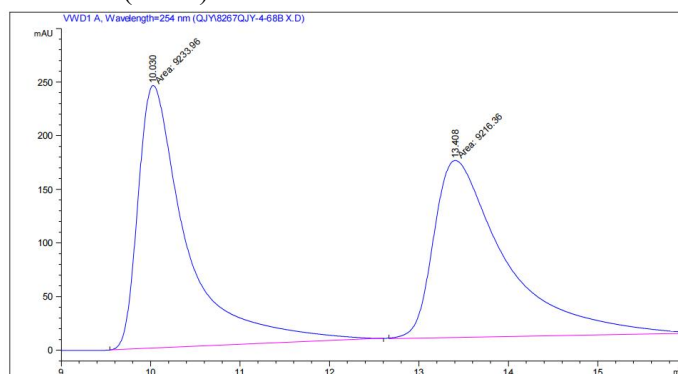

| Peak # | RetTime [min] | Type | Width [min] | Area [mAU*s] | Height [mAU] | Area %  |
|--------|---------------|------|-------------|--------------|--------------|---------|
| 1      | 10.030        | MM   | 0.6288      | 9233.95801   | 244.73254    | 50.0477 |
| 2      | 13.408        | MM   | 0.9304      | 9216.36230   | 165.09607    | 49.9523 |

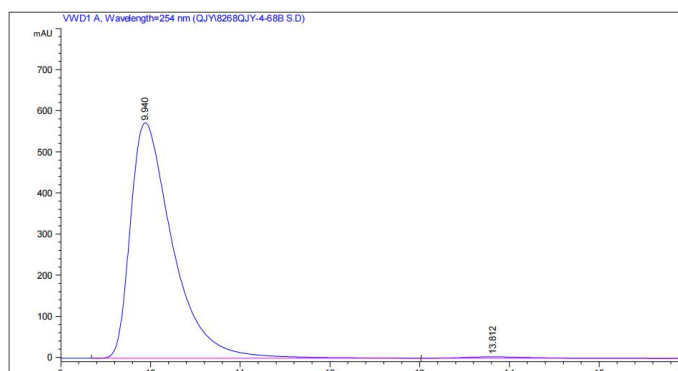

| Peak # | RetTime [min] | Type | Width [min] | Area [mAU*s] | Height [mAU] | Area %  |
|--------|---------------|------|-------------|--------------|--------------|---------|
| 1      | 9.940         | BB   | 0.4911      | 1.87064e4    | 572.71179    | 99.0229 |
| 2      | 13.812        | BB   | 0.7697      | 184.58835    | 3.40890      | 0.9771  |

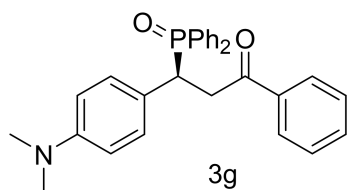

**(S)-3-(4-(dimethylamino)phenyl)-3-(diphenylphosphoryl)-1-phenylpropan-1-one (3g)**

[Purification by flash column chromatography on silica gel (eluent, DCM: MeOH= 70:1). White solid , 94% yield, 92% ee]<sup>1</sup>H NMR (400 MHz, Chloroform-*d*) δ 8.03 – 7.90 (m, 2H), 7.89 – 7.79 (m, 2H), 7.55 – 7.43 (m, 6H), 7.40 – 7.32 (m, 3H), 7.30 – 7.21 (m, 4H), 6.53 (d, *J* = 8.8 Hz, 2H), 4.40 (ddd, *J* = 9.9, 7.0, 2.4 Hz, 1H), 3.97 (ddd, *J* = 18.0, 10.4, 4.2 Hz, 1H), 3.33 (ddd, *J* = 18.0, 11.0, 2.4 Hz, 1H), 2.83 (s, 6H).

<sup>13</sup>C NMR (101 MHz, Chloroform-*d*) δ 196.98 (d, *J* = 13.6 Hz), 149.51, 136.52, 133.25, 132.45 (d, *J* = 17.9 Hz), 131.85 (d, *J* = 2.8 Hz), 131.49 (d, *J* = 10.4 Hz), 131.36, 131.29 (d, *J* = 3.8 Hz), 131.17, 131.09, 130.74 (d, *J* = 11.4 Hz), 130.47 (d, *J* = 5.6 Hz), 128.90 (d, *J* = 3.1 Hz), 128.80, 128.51, 128.14 (d, *J* = 1.7 Hz), 128.01, 112.54, 40.52, 39.90 (d, *J* = 70.5 Hz), 39.12 (d, *J* = 1.7 Hz).

<sup>31</sup>P NMR (162 MHz, Chloroform-*d*) δ 34.65.

HRMS (ESI+, *m/z*): calcd for C<sub>29</sub>H<sub>28</sub>O<sub>2</sub>NP [M+H]<sup>+</sup> : 454.1930, found: 454.1927.

HPLC analysis: Chiracel-ODH, n-heptane/*i*-PrOH =90:10, 1 mL/min, 22°C, detection at 254nm. Retention time (min): 12.78 (major) and 23.89 (minor).

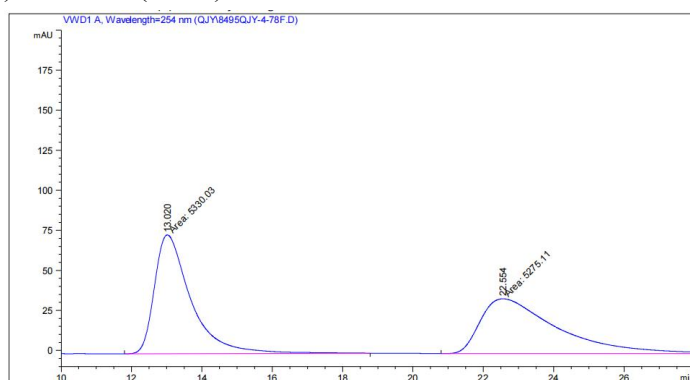

| Peak # | RetTime [min] | Type | Width [min] | Area [mAU*s] | Height [mAU] | Area %  |
|--------|---------------|------|-------------|--------------|--------------|---------|
| 1      | 13.020        | MM   | 1.1984      | 5330.03271   | 74.12776     | 50.2589 |
| 2      | 22.554        | MM   | 2.5697      | 5275.11182   | 34.21387     | 49.7411 |

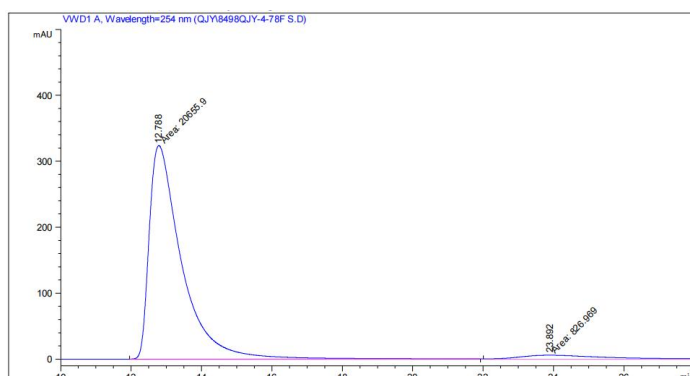

| Peak # | RetTime [min] | Type | Width [min] | Area [mAU*s] | Height [mAU] | Area %  |
|--------|---------------|------|-------------|--------------|--------------|---------|
| 1      | 12.788        | MM   | 1.0634      | 2.06559e4    | 323.73654    | 96.1506 |
| 2      | 23.892        | MM   | 2.4852      | 826.96881    | 5.54600      | 3.8494  |

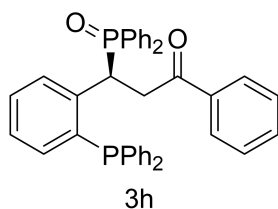

**(S)-3-(2-(diphenylphosphanyl)phenyl)-3-(diphenylphosphoryl)-1-phenylpropan-1-one(3h)**

[Purification by flash column chromatography on silica gel (eluent, DCM: MeOH= 70:1). White solid , 88% yield, 94% ee] <sup>1</sup>H NMR (400 MHz, Chloroform-*d*) δ 8.11 (m, 3H), 7.62 – 7.55 (m, 2H), 7.53 (m, 3H), 7.48 – 7.36 (m, 4H), 7.32 – 7.11 (m, 11H), 7.10 – 7.01 (m, 3H), 6.92 (dd, *J* = 7.8, 3.6 Hz, 1H), 6.74 – 6.67 (m, 2H), 6.09 – 5.97 (m, 1H), 3.84 (dddd, *J* = 17.3, 8.5, 6.6, 1.6 Hz, 1H), 3.51 (ddd, *J* = 17.4, 12.5, 3.4 Hz, 1H).

<sup>13</sup>C NMR (101 MHz, Chloroform-*d*) δ 196.00 (d, *J* = 11.9 Hz), 143.01 (d, *J* = 4.8 Hz), 142.73 (d, *J* = 4.9 Hz), 137.41 (d, *J* = 10.1 Hz), 136.84 (dd, *J* = 10.4, 7.2 Hz), 136.33, 135.78, 133.61, 133.42, 133.19, 133.00, 132.33, 132.06 (d, *J* = 2.8 Hz), 131.70, 131.62, 131.36 (d, *J* = 2.0 Hz), 131.32, 131.27 (d, *J* = 2.4 Hz), 130.76, 129.84, 129.59, 128.94, 128.83, 128.33, 128.26, 128.19 (d, *J* = 1.4 Hz), 128.11, 128.08, 127.96, 127.37 (d, *J* = 2.4 Hz), 40.16, 37.90 (dd, *J* = 67.4, 29.4 Hz).

<sup>31</sup>P NMR (162 MHz, Chloroform-*d*) δ 35.28 (d, *J* = 3.7 Hz), -19.65.

HRMS (ESI+, *m/z*): calcd for C<sub>39</sub>H<sub>33</sub>O<sub>2</sub>P<sub>2</sub> [M+H]<sup>+</sup> : 595.1950, found: 595.1948.

HPLC analysis: Chiracel-ODH, n-heptane/*i*-PrOH= 90:10, 1 mL/min, 22°C, detection at 254nm. Retention time (min): 9.38 (major) and 14.94 (minor).

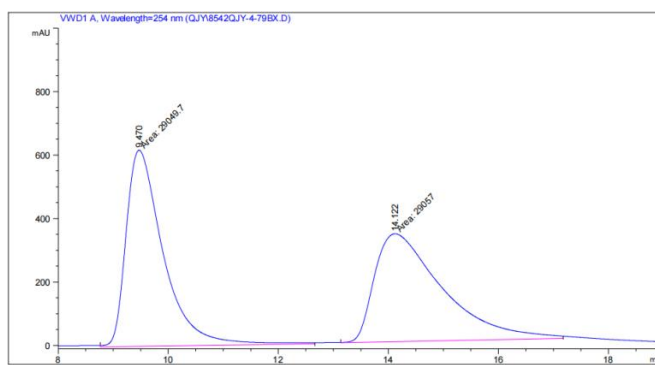

| Peak # | RetTime [min] | Type | Width [min] | Area [mAU*s] | Height [mAU] | Area %  |
|--------|---------------|------|-------------|--------------|--------------|---------|
| 1      | 9.470         | MM   | 0.7834      | 2.90497e4    | 618.01691    | 49.9937 |
| 2      | 14.122        | MM   | 1.4249      | 2.90570e4    | 339.87073    | 50.0063 |

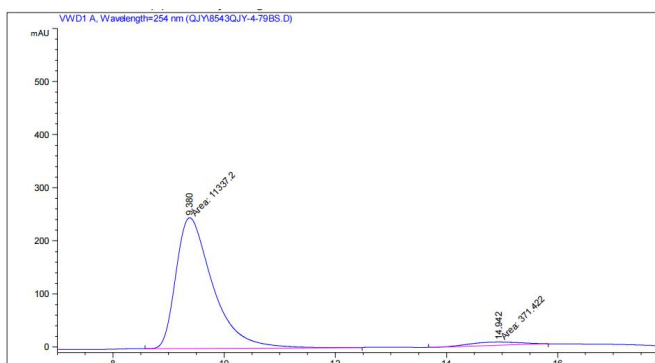

| Peak # | RetTime [min] | Type | Width [min] | Area [mAU*s] | Height [mAU] | Area %  |
|--------|---------------|------|-------------|--------------|--------------|---------|
| 1      | 9.380         | MM   | 0.7682      | 1.13372e4    | 245.97728    | 96.8278 |
| 2      | 14.942        | MM   | 1.0606      | 371.42184    | 5.83682      | 3.1722  |

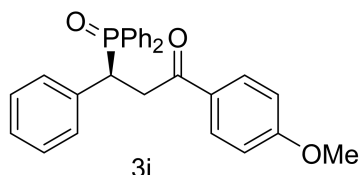

**(S)-3-(diphenylphosphoryl)-1-(4-methoxyphenyl)-3-phenylpropan-1-one(3i)**

[Purification by flash column chromatography on silica gel (eluent, DCM: MeOH = 70:1). White solid, 86% yield, 83% ee]<sup>1</sup>H NMR (400 MHz, Chloroform-*d*) δ 8.03 – 7.93 (m, 2H), 7.86 – 7.79 (m, 2H), 7.56 – 7.40 (m, 5H), 7.41 – 7.28 (m, 3H), 7.28 – 7.19 (m, 2H), 7.18 – 7.06 (m, 3H), 6.86 – 6.80 (m, 2H), 4.47 (ddd, *J* = 9.7, 6.7, 2.4 Hz, 1H), 3.98 (ddd, *J* = 17.9, 10.5, 4.1 Hz, 1H), 3.80 (s, 3H), 3.31 (ddd, *J* = 17.9, 11.2, 2.4 Hz, 1H).

<sup>13</sup>C NMR (101 MHz, Chloroform-*d*) δ 195.06 (d, *J* = 13.3 Hz), 163.62, 135.87 (d, *J* = 5.8 Hz), 132.61 (d, *J* = 3.1 Hz), 132.02 (d, *J* = 2.8 Hz), 131.40 (d, *J* = 2.5 Hz), 131.30, 131.21, 130.94, 130.85, 130.69 (d, *J* = 11.5 Hz), 130.43, 129.81 (d, *J* = 5.7 Hz), 129.40, 128.99, 128.88, 128.25 (d, *J* = 1.9 Hz), 128.11, 127.99, 126.99 (d, *J* = 2.5 Hz), 113.63, 55.44, 41.01 (d, *J* = 69.1 Hz), 38.42.

<sup>31</sup>P NMR (162 MHz, Chloroform-*d*) δ 34.65.

HRMS (ESI<sup>+</sup>, *m/z*): calcd for C<sub>28</sub>H<sub>26</sub>O<sub>3</sub>P [M+H]<sup>+</sup>: 441.1614, found: 441.1616.

HPLC analysis: Chiracel-ODH, n-heptane/*i*-PrOH = 90:10, 1 mL/min, 22°C, detection at 210nm. Retention time (min): 12.02 (major) and 16.13 (minor).

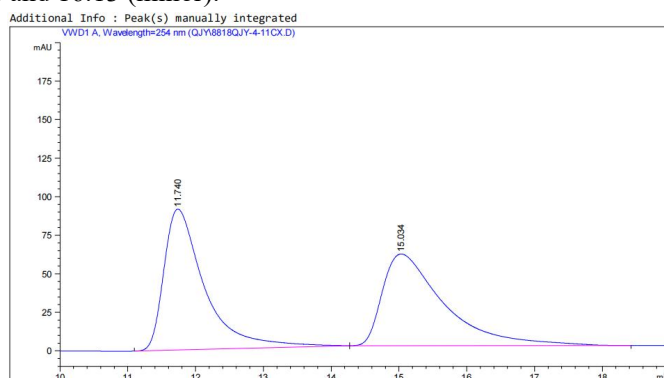

| Peak # | RetTime [min] | Type | Width [min] | Area [mAU*s] | Height [mAU] | Area %  |
|--------|---------------|------|-------------|--------------|--------------|---------|
| 1      | 11.740        | BB   | 0.6168      | 3814.57788   | 91.42477     | 50.5179 |
| 2      | 15.034        | BB   | 0.9258      | 3736.36792   | 59.48424     | 49.4821 |

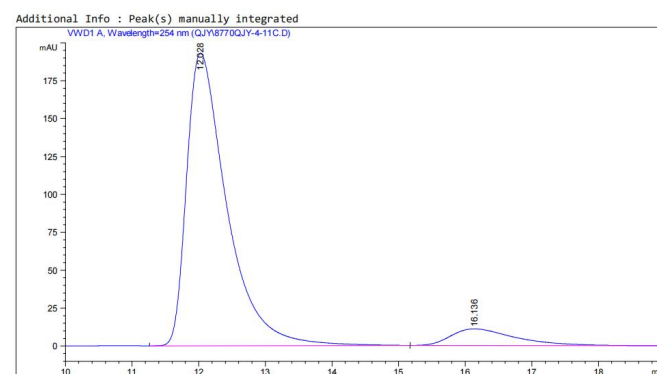

| Peak # | RetTime [min] | Type | Width [min] | Area [mAU*s] | Height [mAU] | Area %  |
|--------|---------------|------|-------------|--------------|--------------|---------|
| 1      | 12.028        | BB   | 0.6252      | 8074.15332   | 192.96614    | 91.6315 |
| 2      | 16.136        | BB   | 0.9827      | 737.39008    | 10.93597     | 8.3685  |

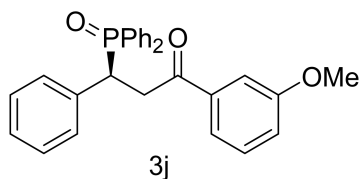

**(S)-3-(diphenylphosphoryl)-1-(3-methoxyphenyl)-3-phenylpropan-1-one(3j)**

[Purification by flash column chromatography on silica gel (eluent, DCM: MeOH = 70:1). White solid, 81% yield, 99% ee]<sup>1</sup>H NMR (400 MHz, Chloroform-*d*)  $\delta$  8.02 – 7.95 (m, 2H), 7.54 – 7.42 (m, 6H), 7.41 – 7.30 (m, 4H), 7.31 – 7.19 (m, 3H), 7.18 – 7.01 (m, 4H), 4.47 (ddd,  $J = 9.9, 6.9, 2.4$  Hz, 1H), 4.02 (ddd,  $J = 18.1, 10.4, 4.2$  Hz, 1H), 3.77 (s, 3H), 3.38 (ddd,  $J = 18.2, 11.2, 2.4$  Hz, 1H).

<sup>13</sup>C NMR (101 MHz, Chloroform-*d*)  $\delta$  195.12 (d,  $J = 13.3$  Hz), 163.68, 135.93 (d,  $J = 5.8$  Hz), 132.67 (d,  $J = 3.1$  Hz), 132.08 (d,  $J = 2.8$  Hz), 131.46 (d,  $J = 2.5$  Hz), 131.32 (d,  $J = 8.5$  Hz), 131.00, 130.91, 130.76 (d,  $J = 11.5$  Hz), 130.49, 129.87 (d,  $J = 5.7$  Hz), 129.47, 129.05, 128.94, 128.32 (d,  $J = 1.9$  Hz), 128.17, 128.05, 127.05 (d,  $J = 2.5$  Hz), 113.69, 55.51, 41.07 (d,  $J = 69.1$  Hz), 38.48.

<sup>31</sup>P NMR (162 MHz, Chloroform-*d*)  $\delta$  34.34.

HRMS (ESI<sup>+</sup>,  $m/z$ ): calcd for C<sub>28</sub>H<sub>26</sub>O<sub>3</sub>P [M+H]<sup>+</sup>: 441.1614, found: 441.1609.

HPLC analysis: Chiracel-ODH, n-heptane/*i*-PrOH = 90:10, 1 mL/min, 22°C, detection at 254nm. Retention time (min): 9.08 (major) and 12.18 (minor).

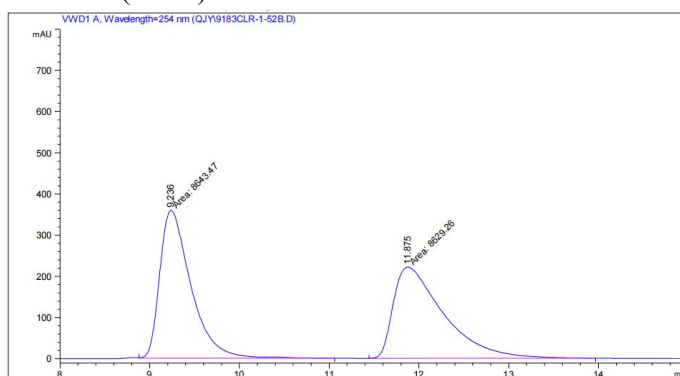

| Peak # | RetTime [min] | Type | Width [min] | Area [mAU*s] | Height [mAU] | Area %  |
|--------|---------------|------|-------------|--------------|--------------|---------|
| 1      | 9.236         | MM   | 0.4013      | 8643.47168   | 358.98538    | 50.0411 |
| 2      | 11.875        | MM   | 0.6497      | 8629.26465   | 221.37262    | 49.9589 |

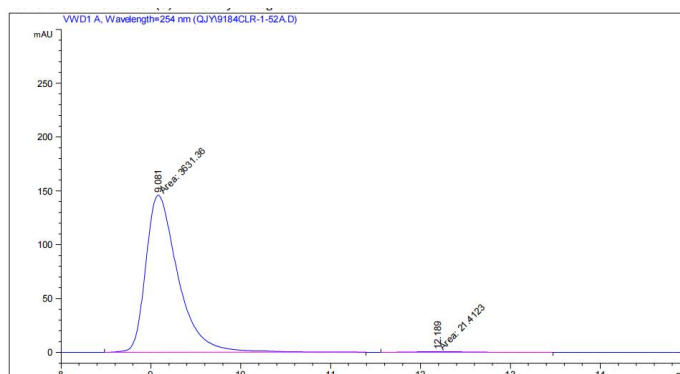

| Peak # | RetTime [min] | Type | Width [min] | Area [mAU*s] | Height [mAU] | Area %  |
|--------|---------------|------|-------------|--------------|--------------|---------|
| 1      | 9.081         | MM   | 0.4150      | 3631.36133   | 145.84474    | 99.4138 |
| 2      | 12.189        | MM   | 0.6468      | 21.41230     | 5.51766e-1   | 0.5862  |

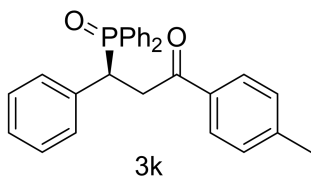

**(S)-3-(diphenylphosphoryl)-3-phenyl-1-(p-tolyl)propan-1-one (3k)**

[Purification by flash column chromatography on silica gel (eluent, DCM: MeOH = 70:1). White solid, 85% yield, 97% ee] <sup>1</sup>H NMR (400 MHz, Chloroform-*d*) δ 8.03 – 7.94 (m, 2H), 7.76 – 7.73 (m, 2H), 7.52 (m, 3H), 7.49 – 7.43 (m, 2H), 7.40 – 7.31 (m, 3H), 7.24 (m, 2H), 7.18 – 7.06 (m, 5H), 4.48 (ddd, *J* = 10.4, 6.8, 2.4 Hz, 1H), 4.01 (ddd, *J* = 18.1, 10.4, 4.2 Hz, 1H), 3.35 (ddd, *J* = 18.1, 11.2, 2.4 Hz, 1H), 2.34 (s, 3H).

<sup>13</sup>C NMR (101 MHz, Chloroform-*d*) δ 196.26 (d, *J* = 13.3 Hz), 144.31, 135.88 (d, *J* = 5.6 Hz), 133.88, 132.08 (d, *J* = 2.8 Hz), 131.46 (d, *J* = 2.8 Hz), 131.30 (d, *J* = 8.5 Hz), 131.00, 130.91, 129.86 (d, *J* = 5.6 Hz), 129.25, 129.05, 128.93, 128.31 (d, *J* = 2.1 Hz), 128.27, 128.16, 128.05, 127.06 (d, *J* = 2.5 Hz), 41.01 (d, *J* = 69.1 Hz), 38.77, 21.65.

<sup>31</sup>P NMR (162 MHz, Chloroform-*d*) δ 34.55.

HRMS (ESI<sup>+</sup>, *m/z*): calcd for C<sub>28</sub>H<sub>26</sub>O<sub>2</sub>P [M+H]<sup>+</sup> :425.1665, found: 425.1663.

HPLC analysis: Chiracel-ODH, n-heptane/*i*-PrOH = 90:10, 1 mL/min, 22°C, detection at 254nm. Retention time (min): 7.72 (major) and 9.97 (minor).

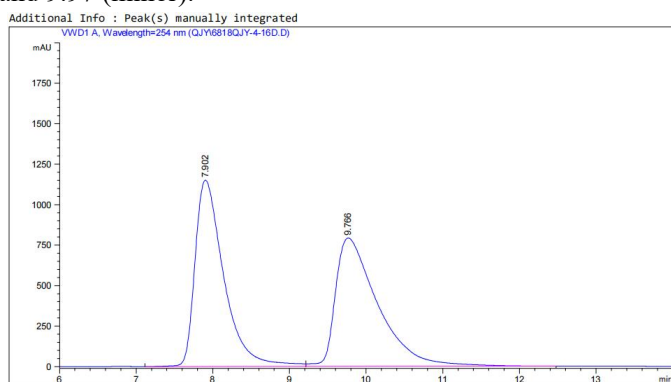

| Peak # | RetTime [min] | Type | Width [min] | Area [mAU*s] | Height [mAU] | Area %  |
|--------|---------------|------|-------------|--------------|--------------|---------|
| 1      | 7.902         | BV   | 0.3935      | 3.00365e4    | 1150.74353   | 49.7198 |
| 2      | 9.766         | VB   | 0.5672      | 3.03750e4    | 792.42438    | 50.2802 |

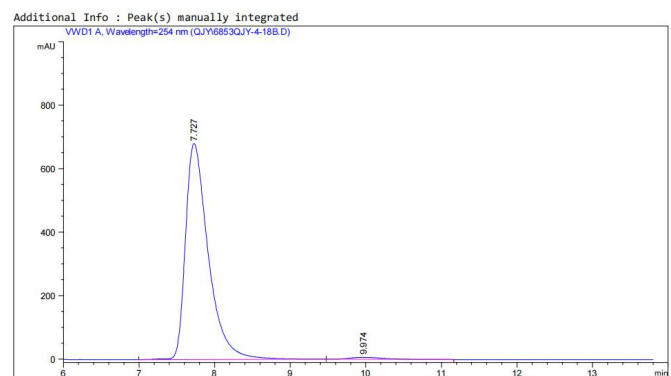

| Peak # | RetTime [min] | Type | Width [min] | Area [mAU*s] | Height [mAU] | Area %  |
|--------|---------------|------|-------------|--------------|--------------|---------|
| 1      | 7.727         | BB   | 0.3164      | 1.42403e4    | 679.74005    | 98.6284 |
| 2      | 9.974         | BB   | 0.4808      | 198.04279    | 6.31665      | 1.3716  |

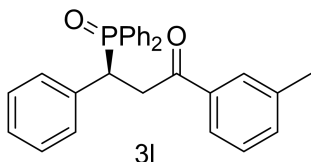

**(S)-3-(diphenylphosphoryl)-3-phenyl-1-(m-tolyl)propan-1-one (3l)**

[Purification by flash column chromatography on silica gel (eluent, DCM: MeOH = 70:1). White solid, 89% yield, 94% ee] <sup>1</sup>H NMR (400 MHz, Chloroform-*d*) δ 8.06 – 7.93 (m, 2H), 7.86 – 7.83 (m, 2H), 7.54 – 7.46 (m, 6H), 7.41 – 7.30 (m, 3H), 7.30 – 7.21 (m, 2H), 7.06 (t, *J* = 7.9 Hz, 1H), 7.02 – 6.95 (m, 1H), 6.91 (d, *J* = 2.2 Hz, 1H), 6.65 (d, *J* = 8.2 Hz, 1H), 4.47 (ddd, *J* = 9.8, 7.0, 2.4 Hz, 1H), 4.03 (ddd, *J* = 18.2, 10.4, 4.3 Hz, 1H), 3.65 (s, 3H), 3.38 (ddd, *J* = 18.1, 11.3, 2.4 Hz, 1H).

<sup>13</sup>C NMR (101 MHz, Chloroform-*d*) δ 196.56 (d, *J* = 13.2 Hz), 159.24 (d, *J* = 2.0 Hz), 137.30 (d, *J* = 5.5 Hz), 136.28, 133.35, 132.03 (d, *J* = 3.1 Hz), 131.44 (d, *J* = 2.8 Hz), 131.25 (d, *J* = 8.5 Hz), 131.01, 130.92, 130.77 (d, *J* = 8.6 Hz), 129.19 (d, *J* = 2.0 Hz), 128.98, 128.87, 128.52, 128.12, 128.08, 128.01, 122.17 (d, *J* = 5.7 Hz), 114.98 (d, *J* = 5.6 Hz), 113.15 (d, *J* = 2.5 Hz), 55.08, 41.06 (d, *J* = 69.0 Hz), 38.80.

<sup>31</sup>P NMR (162 MHz, Chloroform-*d*) δ 34.18.

HRMS (ESI<sup>+</sup>, *m/z*): calcd for C<sub>28</sub>H<sub>26</sub>O<sub>2</sub>P [M+H]<sup>+</sup>: 425.1665, found: 425.1664.

HPLC analysis: Chiracel-ODH, n-heptane/*i*-PrOH = 90:10, 1 mL/min, 22°C, detection at 254nm. Retention time (min): 7.20 (major) and 9.35 (minor).

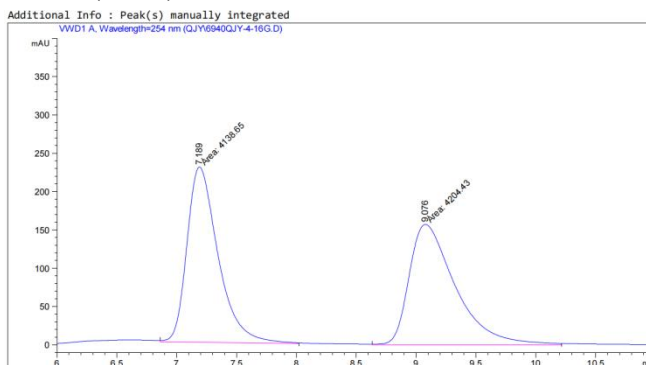

| Peak # | RetTime [min] | Type | Width [min] | Area [mAU*s] | Height [mAU] | Area %  |
|--------|---------------|------|-------------|--------------|--------------|---------|
| 1      | 7.189         | MM   | 0.3016      | 4138.65234   | 228.68080    | 49.6058 |
| 2      | 9.076         | MM   | 0.4462      | 4204.42725   | 157.04059    | 50.3942 |

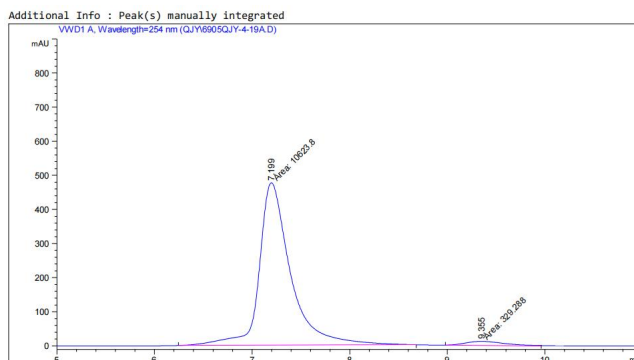

| Peak # | RetTime [min] | Type | Width [min] | Area [mAU*s] | Height [mAU] | Area %  |
|--------|---------------|------|-------------|--------------|--------------|---------|
| 1      | 7.199         | MM   | 0.3720      | 1.06238e4    | 476.03223    | 96.9936 |
| 2      | 9.355         | MM   | 0.4623      | 329.28754    | 11.87162     | 3.0064  |

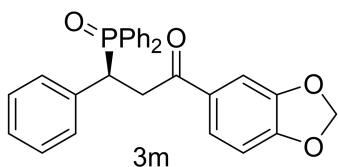

**(S)-1-(benzo[d][1,3]dioxol-5-yl)-3-(diphenylphosphoryl)-3-phenylpropan-1-one (3m)**

[Purification by flash column chromatography on silica gel (eluent, DCM: MeOH = 70:1). White solid. 94% yield, 85% ee] <sup>1</sup>H NMR (400 MHz, Chloroform-*d*) δ 8.01 – 7.91 (m, 2H), 7.56 – 7.40 (m, 6H), 7.38 – 7.21 (m, 6H), 7.18 – 7.08 (m, 3H), 6.77 (d, *J* = 8.2 Hz, 1H), 6.01 – 5.95 (m, 2H), 4.46 (ddd, *J* = 10.5, 6.7, 2.5 Hz, 1H), 3.97 (ddd, *J* = 17.9, 10.5, 4.5 Hz, 1H), 3.27 (ddd, *J* = 17.9, 11.1, 2.5 Hz, 1H).

<sup>13</sup>C NMR (101 MHz, Chloroform-*d*) δ 194.69 (d, *J* = 13.5 Hz), 151.95, 148.07, 135.82 (d, *J* = 5.7 Hz), 132.03 (d, *J* = 2.4 Hz), 131.41 (d, *J* = 2.7 Hz), 131.31, 131.23, 130.95, 130.87, 129.78 (d, *J* = 5.6 Hz), 128.94 (d, *J* = 11.2 Hz), 128.28 (d, *J* = 2.0 Hz), 128.06 (d, *J* = 11.8 Hz), 127.03 (d, *J* = 2.6 Hz), 124.58, 107.80, 101.84, 41.14 (d, *J* = 69.1 Hz), 38.56.

<sup>31</sup>P NMR (162 MHz, Chloroform-*d*) δ 34.48.

HRMS (ESI<sup>+</sup>, *m/z*): calcd for C<sub>28</sub>H<sub>24</sub>O<sub>4</sub>P [M+H]<sup>+</sup>: 455.1407, found: 455.1408.

HPLC analysis: Chiracel-ODH, n-heptane/*i*-PrOH = 90:10, 1 mL/min, 22°C, detection at 254nm. Retention time (min): 16.77(major) and 25.12 (minor).

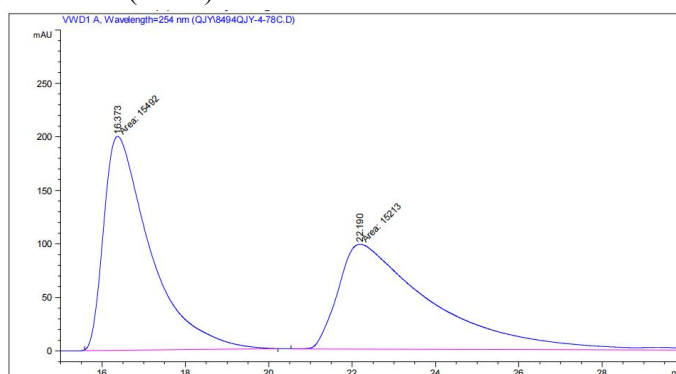

| Peak # | RetTime [min] | Type | Width [min] | Area [mAU*s] | Height [mAU] | Area %  |
|--------|---------------|------|-------------|--------------|--------------|---------|
| 1      | 16.373        | MM   | 1.2928      | 1.54920e4    | 199.72209    | 50.4543 |
| 2      | 22.190        | MM   | 2.5916      | 1.52130e4    | 97.83443     | 49.5457 |

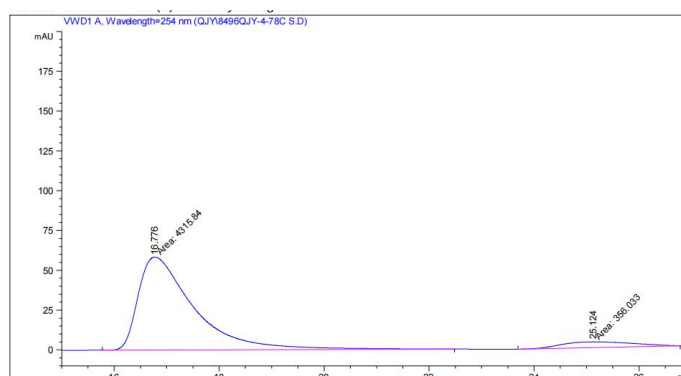

| Peak # | RetTime [min] | Type | Width [min] | Area [mAU*s] | Height [mAU] | Area %  |
|--------|---------------|------|-------------|--------------|--------------|---------|
| 1      | 16.776        | MM   | 1.2312      | 4315.83691   | 58.42198     | 92.3792 |
| 2      | 25.124        | MM   | 1.1527      | 356.03320    | 3.68489      | 7.6208  |



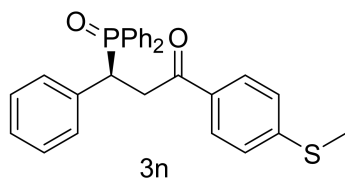

**(S)-3-(diphenylphosphoryl)-1-(4-(methylthio)phenyl)-3-phenylpropan-1-one (3n)**

[Purification by flash column chromatography on silica gel (eluent, DCM: MeOH = 70:1). White solid, 98% yield, 99% ee] <sup>1</sup>H NMR (400 MHz, Chloroform-*d*) δ 8.05 – 7.93 (m, 2H), 7.83 – 7.67 (m, 2H), 7.54 – 7.40 (m, 5H), 7.38 – 7.28 (m, 3H), 7.26 – 7.20 (m, 2H), 7.17 – 7.06 (m, 5H), 4.55 – 4.34 (m, 1H), 3.98 (ddd, *J* = 17.9, 10.4, 4.3 Hz, 1H), 3.32 (ddd, *J* = 18.0, 11.1, 2.4 Hz, 1H), 2.44 (s, 3H).

<sup>13</sup>C NMR (101 MHz, Chloroform-*d*) δ 195.64 (d, *J* = 13.4 Hz), 146.44, 135.89 (d, *J* = 5.6 Hz), 132.58, 132.10, 132.09, 131.46 (d, *J* = 2.8 Hz), 131.34, 131.25, 130.99, 130.91, 129.83 (d, *J* = 5.7 Hz), 129.05, 128.94, 128.52, 128.33 (d, *J* = 2.0 Hz), 128.17, 128.05, 127.09 (d, *J* = 2.2 Hz), 124.77, 41.07 (d, *J* = 69.1 Hz), 38.64, 14.66.

<sup>31</sup>P NMR (162 MHz, Chloroform-*d*) δ 31.14.

HRMS (ESI<sup>+</sup>, *m/z*): calcd for C<sub>28</sub>H<sub>26</sub>O<sub>2</sub>PS [M+H]<sup>+</sup>: 457.1386, found: 457.1385.

HPLC analysis: Chiracel-ODH, n-heptane/*i*-PrOH = 90:10, 1 mL/min, 22°C, detection at 254nm. Retention time (min): 14.02 (major) and 19.37 (minor).

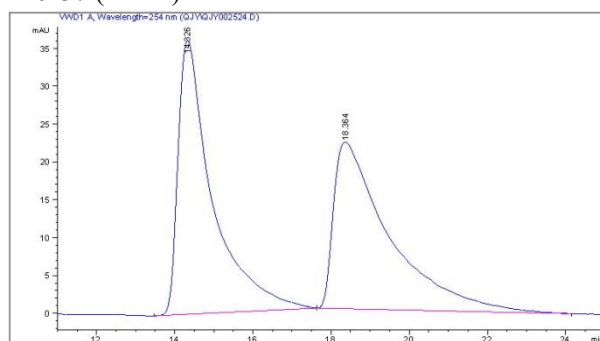

| Peak # | RetTime [min] | Type | Width [min] | Area [mAU*s] | Height [mAU] | Area %  |
|--------|---------------|------|-------------|--------------|--------------|---------|
| 1      | 14.326        | BB   | 0.8546      | 2201.73291   | 36.19795     | 50.3514 |
| 2      | 18.364        | BB   | 1.3114      | 2171.00439   | 21.99820     | 49.6486 |

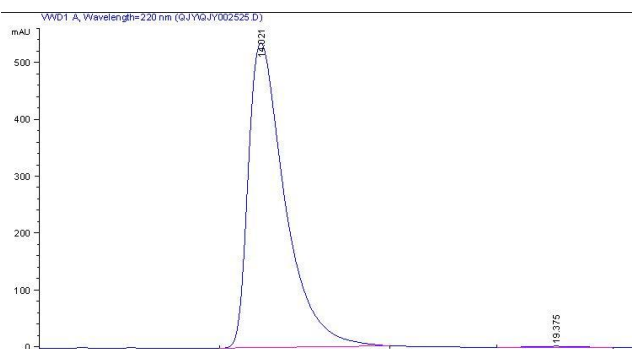

| Peak # | RetTime [min] | Type | Width [min] | Area [mAU*s] | Height [mAU] | Area %  |
|--------|---------------|------|-------------|--------------|--------------|---------|
| 1      | 14.021        | BB   | 0.6855      | 2.46792e4    | 534.65369    | 99.4047 |
| 2      | 19.375        | BB   | 0.7484      | 147.80658    | 2.35452      | 0.5953  |

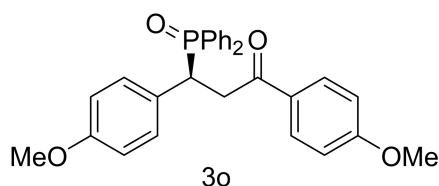

**(S)-3-(diphenylphosphoryl)-1,3-bis(4-methoxyphenyl)propan-1-one (3o)**

[Purification by flash column chromatography on silica gel (eluent, DCM: MeOH = 70:1). White solid, 85% yield, 95% ee] <sup>1</sup>H NMR (400 MHz, Chloroform-*d*) δ 8.02 – 7.93 (m, 2H), 7.83 (d, *J* = 8.9 Hz, 2H), 7.53 – 7.43 (m, 6H), 7.34 – 7.24 (m, 4H), 6.83 (d, *J* = 8.9 Hz, 2H), 6.68 (d, *J* = 8.7 Hz, 2H), 4.44 (ddd, *J* = 10.6, 6.8, 2.3 Hz, 1H), 3.94 (ddd, *J* = 17.8, 10.6, 4.2 Hz, 1H), 3.80 (s, 3H), 3.67 (s, 3H), 3.27 (ddd, *J* = 17.8, 10.9, 2.4 Hz, 1H).

<sup>13</sup>C NMR (101 MHz, Chloroform-*d*) δ 195.21 (d, *J* = 13.6 Hz), 163.60, 158.44 (d, *J* = 2.3 Hz), 132.58 (d, *J* = 2.9 Hz), 132.27, 131.98, 131.93 (d, *J* = 2.9 Hz), 131.35 (d, *J* = 2.8 Hz), 131.25, 131.17, 130.96, 130.80 (dd, *J* = 10.1, 4.5 Hz), 130.62, 130.40, 129.48, 128.95 (d, *J* = 1.4 Hz), 128.83, 128.14, 128.02, 127.75 (d, *J* = 5.7 Hz), 113.62, 55.42, 55.04, 40.10 (d, *J* = 70.1 Hz), 38.52.

<sup>31</sup>P NMR (162 MHz, Chloroform-*d*) δ 34.94.

HRMS (ESI<sup>+</sup>, *m/z*): calcd for C<sub>29</sub>H<sub>28</sub>O<sub>4</sub>P [M+H]<sup>+</sup> : 471.1720, found: 471.1717.

HPLC analysis: Chiracel-ODH, n-heptane/*i*-PrOH =90:10, 1 mL/min, 22°C, detection at 254nm. Retention time (min): 15.16 (major) and 22.754 (minor).

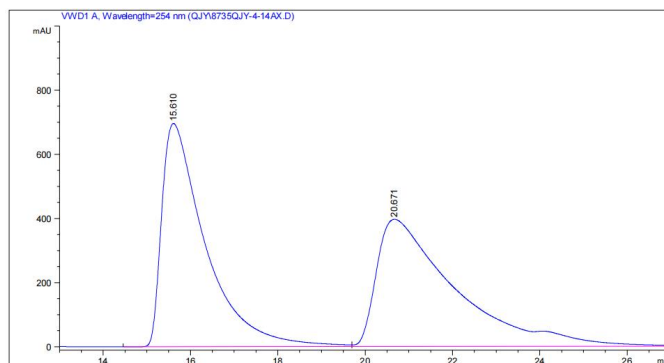

| Peak # | RetTime [min] | Type | Width [min] | Area [mAU*s] | Height [mAU] | Area %  |
|--------|---------------|------|-------------|--------------|--------------|---------|
| 1      | 15.610        | BV   | 1.0077      | 4.82205e4    | 695.66962    | 49.3610 |
| 2      | 20.671        | VV R | 1.7013      | 4.94689e4    | 396.32513    | 50.6390 |

Additional Info : Peak(s) manually integrated

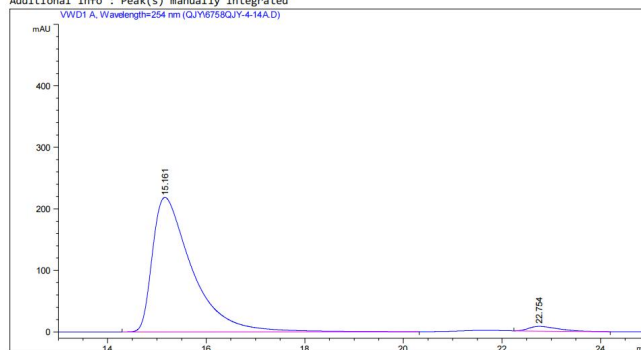

| Peak # | RetTime [min] | Type | Width [min] | Area [mAU*s] | Height [mAU] | Area %  |
|--------|---------------|------|-------------|--------------|--------------|---------|
| 1      | 15.161        | BB   | 0.8292      | 1.21805e4    | 218.55498    | 97.5576 |
| 2      | 22.754        | BBA  | 0.6126      | 304.94110    | 7.48022      | 2.4424  |

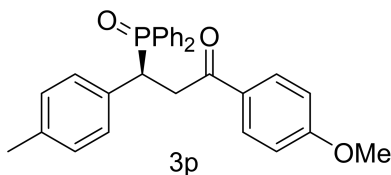

**(S)-3-(diphenylphosphoryl)-1-(4-methoxyphenyl)-3-(p-tolyl)propan-1-one (3p)<sup>[2]</sup>**

[Purification by flash column chromatography on silica gel (eluent, DCM: MeOH= 70:1). White solid, 90% yield, 98% ee] <sup>1</sup>H NMR (400 MHz, Chloroform-*d*) δ 8.07 – 7.95 (m, 2H), 7.86 (d, *J* = 8.9 Hz, 1H), 7.57 – 7.48 (m, 6H), 7.42 – 7.33 (m, 1H), 7.32 – 7.24 (m, 4H), 6.98 (d, *J* = 7.9 Hz, 2H), 6.86 (d, *J* = 8.9 Hz, 2H), 4.54 – 4.44 (ddd, *J* = 10.6, 6.8, 2.3 Hz, 1H), 3.98 (ddd, *J* = 17.8, 10.5, 4.3 Hz, 1H), 3.83 (s, 3H), 3.32 (ddd, *J* = 17.9, 11.1, 2.4 Hz, 1H), 2.22 (s, 3H).

<sup>13</sup>C NMR (101 MHz, Chloroform-*d*) δ 195.24 (d, *J* = 12.3 Hz), 163.63, 133.55, 133.01 (d, *J* = 5.4 Hz), 132.14 (d, *J* = 2.9 Hz), 131.86 (d, *J* = 6.9 Hz), 131.53 (d, *J* = 8.4 Hz), 131.23 (d, *J* = 2.8 Hz), 130.63 (d, *J* = 9.2 Hz), 130.47, 129.32, 129.03, 128.92, 128.58, 127.74, 127.62, 127.05 (d, *J* = 5.8 Hz), 125.99, 125.37 (d, *J* = 2.8 Hz), 125.26, 123.14, 113.63, 55.44, 39.74, 34.31 (d, *J* = 69.4 Hz).

<sup>31</sup>P NMR (162 MHz, Chloroform-*d*) δ 34.68.

HRMS (ESI+, *m/z*): calcd for C<sub>29</sub>H<sub>28</sub>O<sub>3</sub>P [M+H]<sup>+</sup> : 455.1776, found 455.1774.

HPLC analysis: Chiracel-ODH, n-heptane/*i*-PrOH= 90:10, 1 mL/min, 22°C, detection at 254nm. Retention time (min): 11.12 (major) and 19.077(minor).

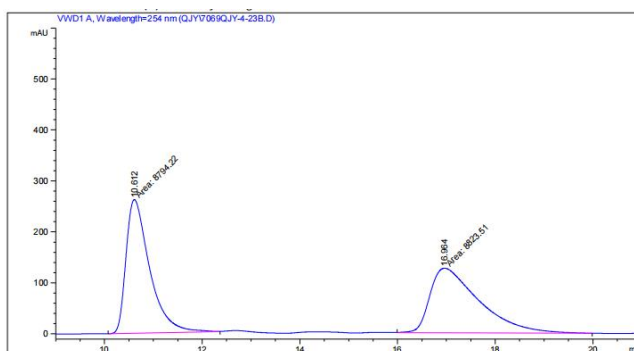

| Peak # | RetTime [min] | Type | Width [min] | Area [mAU*s] | Height [mAU] | Area %  |
|--------|---------------|------|-------------|--------------|--------------|---------|
| 1      | 10.612        | MM   | 0.5593      | 8794.21973   | 262.04874    | 49.9169 |
| 2      | 16.964        | MM   | 1.1596      | 8823.51270   | 126.81302    | 50.0831 |

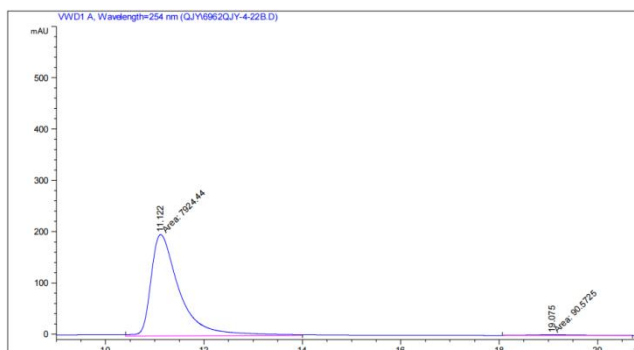

| Peak # | RetTime [min] | Type | Width [min] | Area [mAU*s] | Height [mAU] | Area %  |
|--------|---------------|------|-------------|--------------|--------------|---------|
| 1      | 11.122        | MM   | 0.6698      | 7924.43506   | 197.17471    | 98.8700 |
| 2      | 19.075        | MM   | 1.2069      | 90.57246     | 1.25072      | 1.1300  |

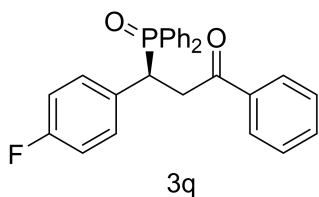

**(S)-3-(diphenylphosphoryl)-3-(4-fluorophenyl)-1-phenylpropan-1-one (3q)**

[Purification by flash column chromatography on silica gel (eluent, DCM: MeOH = 70:1). White solid, 87% yield, 97% ee] <sup>1</sup>H NMR (400 MHz, Chloroform-*d*) δ 7.98 (m, 2H), 7.90 – 7.84 (m, 2H), 7.56 – 7.41 (m, 5H), 7.41 – 7.30 (m, 3H), 7.24 (m, 2H), 7.20 – 7.06 (m, 3H), 7.04 (t, *J* = 8.6 Hz, 2H), 4.45 (ddd, *J* = 9.9, 6.9, 2.5 Hz, 1H), 3.98 (ddd, *J* = 18.0, 10.3, 4.5 Hz, 1H), 3.36 (ddd, *J* = 18.0, 11.1, 2.5 Hz, 1H).

<sup>13</sup>C NMR (101 MHz, Chloroform-*d*) δ 196.59 (d, *J* = 13.4 Hz), 161.88 (dd, *J* = 245.9, 2.7 Hz), 136.21, 133.54, 132.64 (d, *J* = 2.8 Hz), 132.20 (d, *J* = 2.8 Hz), 131.92, 131.62, 131.57 (d, *J* = 4.6 Hz), 131.42, 131.35 (d, *J* = 2.4 Hz), 131.27, 131.18, 130.91, 130.82, 130.64 (d, *J* = 7.9 Hz), 129.12, 129.01, 128.64, 128.30, 128.19, 128.12, 115.38 (d, *J* = 1.9 Hz), 115.17 (d, *J* = 1.9 Hz), 40.23 (d, *J* = 69.5 Hz), 39.04.

<sup>31</sup>P NMR (162 MHz, Chloroform-*d*) δ 34.25.

HRMS (ESI<sup>+</sup>, *m/z*): calcd for C<sub>27</sub>H<sub>23</sub>FO<sub>2</sub>P [M+H]<sup>+</sup> :429.1414, found 429.1411.

HPLC analysis: Chiracel-ODH, n-heptane/*i*-PrOH =90:10, 1 mL/min, 22°C, detection at 254nm. Retention time (min): 7.78 (major) and 9.97 (minor).

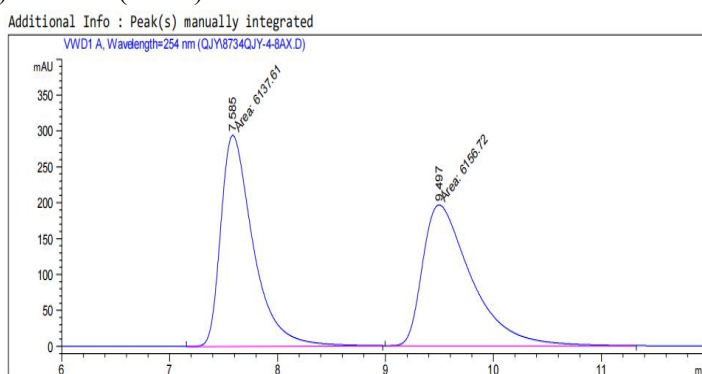

| Peak # | RetTime [min] | Type | Width [min] | Area [mAU*s] | Height [mAU] | Area %  |
|--------|---------------|------|-------------|--------------|--------------|---------|
| 1      | 7.585         | MM   | 0.3478      | 6137.60742   | 294.15753    | 49.9223 |
| 2      | 9.497         | MM   | 0.5230      | 6156.71777   | 196.18063    | 50.0777 |

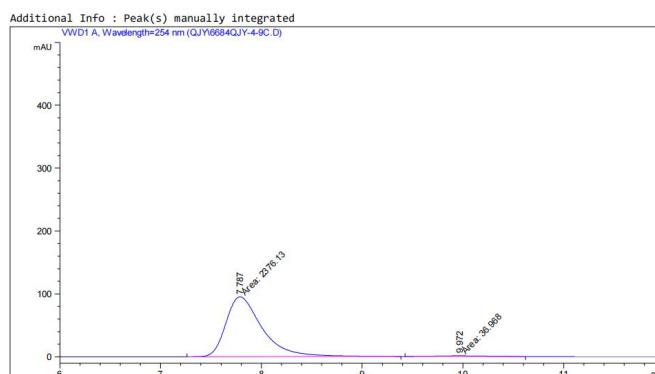

| Peak # | RetTime [min] | Type | Width [min] | Area [mAU*s] | Height [mAU] | Area %  |
|--------|---------------|------|-------------|--------------|--------------|---------|
| 1      | 7.787         | MM   | 0.4163      | 2376.13086   | 95.13705     | 98.4680 |
| 2      | 9.972         | MM   | 0.5994      | 36.96798     | 1.02799      | 1.5320  |

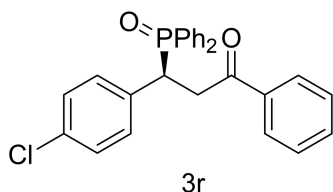

**(S)-3-(4-chlorophenyl)-3-(diphenylphosphoryl)-1-phenylpropan-1-one (3r)**

[Purification by flash column chromatography on silica gel (eluent, DCE: MeOH = 70:1). White solid, 93% yield, 98% ee] <sup>1</sup>H NMR (400 MHz, Chloroform-*d*) δ 7.97 (m, 2H), 7.87 – 7.81 (m, 2H), 7.57 – 7.48 (m, 6H), 7.38 (t, *J* = 7.7 Hz, 3H), 7.35 – 7.25 (m, 4H), 7.12 (d, *J* = 8.2 Hz, 2H), 4.46 (ddd, *J* = 9.7, 6.7, 2.4 Hz, 1H), 4.00 (ddd, *J* = 18.2, 10.6, 4.3 Hz, 1H), 3.34 (ddd, *J* = 18.2, 10.8, 2.4 Hz, 1H).

<sup>13</sup>C NMR (101 MHz, Chloroform-*d*) δ 196.52 (d, *J* = 13.4 Hz), 136.09, 134.32 (d, *J* = 5.7 Hz), 133.60, 133.04 (d, *J* = 3.1 Hz), 132.74 (d, *J* = 2.9 Hz), 132.32 (d, *J* = 2.7 Hz), 131.79 (d, *J* = 2.9 Hz), 131.17, 131.09, 131.04, 130.86, 130.77, 130.65, 129.17, 129.05 (d, *J* = 1.5 Hz), 128.64, 128.49 (d, *J* = 1.9 Hz), 128.40, 128.28, 128.11, 49.54 (dt, *J* = 43.0, 21.5 Hz), 40.41 (d, *J* = 68.9 Hz), 38.72.

<sup>31</sup>P NMR (162 MHz, CDCl<sub>3</sub>) δ 34.45.

HRMS (ESI<sup>+</sup>, *m/z*): calcd for C<sub>27</sub>H<sub>23</sub>O<sub>2</sub>ClP [M+H]<sup>+</sup> : 445.1119, found: 445.1114.

HPLC analysis: Chiracel-ODH, n-heptane/*i*-PrOH =90:10, 1 mL/min, 22°C, detection at 254nm. Retention time (min): 9.43 (major) and 11.54 (minor)

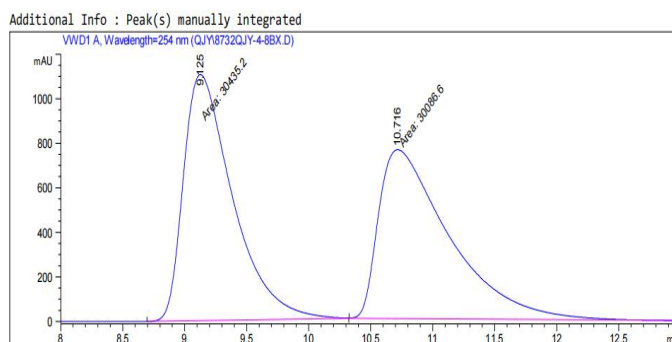

| Peak # | RetTime [min] | Type | Width [min] | Area [mAU*s] | Height [mAU] | Area %  |
|--------|---------------|------|-------------|--------------|--------------|---------|
| 1      | 9.125         | MM   | 0.4595      | 3.04352e4    | 1103.92566   | 50.2880 |
| 2      | 10.716        | MM   | 0.6613      | 3.00866e4    | 758.23993    | 49.7120 |

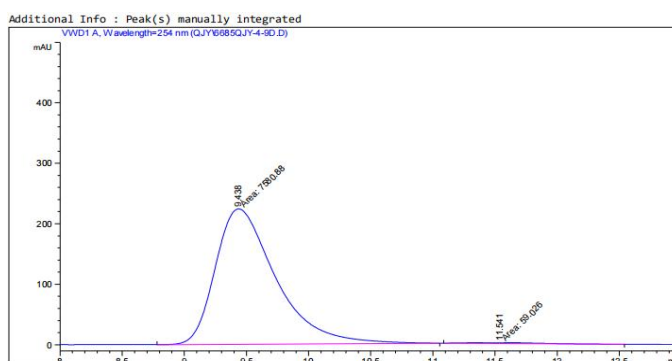

| Peak # | RetTime [min] | Type | Width [min] | Area [mAU*s] | Height [mAU] | Area %  |
|--------|---------------|------|-------------|--------------|--------------|---------|
| 1      | 9.438         | MM   | 0.5642      | 7580.88232   | 223.93806    | 99.2274 |
| 2      | 11.541        | MM   | 0.5996      | 59.02604     | 1.64083      | 0.7726  |

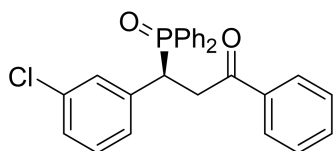

3s

**(S)-3-(3-chlorophenyl)-3-(diphenylphosphoryl)-1-phenylpropan-1-one (3s)**

[Purification by flash column chromatography on silica gel (eluent, DCE: MeOH= 70:1). White solid, 90% yield, 96% ee] <sup>1</sup>H NMR (400 MHz, Chloroform-*d*) δ 7.98 (m, 2H), 7.60 (d, *J* = 7.9 Hz, 1H), 7.54 – 7.40 (m, 6H), 7.41 – 7.33 (m, 2H), 7.36 – 7.26 (m, 2H), 7.25 – 7.19 (m, 2H), 7.18 – 7.04 (m, 4H), 4.44 (ddd, *J* = 9.8, 6.9, 2.5 Hz, 1H), 3.98 (ddd, *J* = 18.2, 10.3, 4.6 Hz, 1H), 3.36 (ddd, *J* = 18.1, 11.0, 2.5 Hz, 1H).

<sup>13</sup>C NMR (101 MHz, Chloroform-*d*) δ 195.59 (dd, *J* = 13.4, 2.0 Hz), 162.71 (d, *J* = 248.3 Hz), 138.37 (d, *J* = 6.1 Hz), 135.72 (d, *J* = 5.7 Hz), 132.15 (d, *J* = 2.7 Hz), 131.53 (d, *J* = 2.8 Hz), 131.34, 131.25, 131.01, 130.92, 130.29 (d, *J* = 7.6 Hz), 129.82, 129.77, 129.08, 128.97, 128.39 (d, *J* = 1.9 Hz), 128.19, 128.08, 127.20 (d, *J* = 2.5 Hz), 123.94 (d, *J* = 3.0 Hz), 120.56, 120.34, 114.93, 114.70, 41.08 (d, *J* = 69.0 Hz), 39.18.

<sup>31</sup>P NMR (162 MHz, Chloroform-*d*) δ 34.20.

HRMS (ESI<sup>+</sup>, *m/z*): calcd for C<sub>27</sub>H<sub>23</sub>O<sub>2</sub>ClP [M+H]<sup>+</sup> : 445.1119, found: 445.1114.

HPLC analysis: Chiracel-ODH, n-heptane/*i*-PrOH =90:10, 1 mL/min, 22°C, detection at 254nm. Retention time (min): 7.72 (major) and 9.97 (minor).

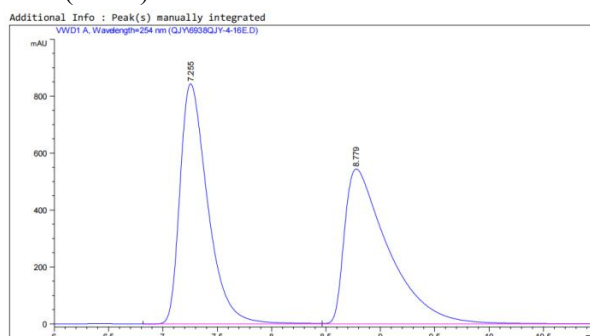

| Peak # | RetTime [min] | Type | Width [min] | Area [mAU*s] | Height [mAU] | Area %  |
|--------|---------------|------|-------------|--------------|--------------|---------|
| 1      | 7.255         | BV   | 0.2711      | 1.49664e4    | 843.14417    | 49.2908 |
| 2      | 8.779         | VV R | 0.4061      | 1.53971e4    | 544.03400    | 50.7092 |

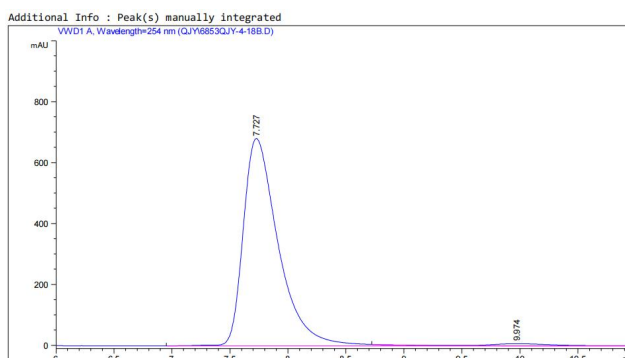

| Peak # | RetTime [min] | Type | Width [min] | Area [mAU*s] | Height [mAU] | Area %  |
|--------|---------------|------|-------------|--------------|--------------|---------|
| 1      | 7.727         | BV R | 0.3176      | 1.43140e4    | 679.92059    | 98.0609 |
| 2      | 9.974         | VB E | 0.5848      | 283.05115    | 7.04404      | 1.9391  |

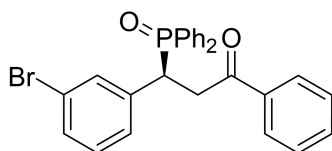

3t

**(S)-3-(3-bromophenyl)-3-(diphenylphosphoryl)-1-phenylpropan-1-one (3t)<sup>[2]</sup>**

[Purification by flash column chromatography on silica gel (eluent, DCE: MeOH = 70:1). White solid, 85% yield, 94% ee]<sup>1</sup>**H NMR** (400 MHz, Chloroform-*d*)  $\delta$  8.03 – 7.93 (m, 2H), 7.88 – 7.81 (m, 2H), 7.59 – 7.44 (m, 6H), 7.42 – 7.33 (m, 4H), 7.34 – 7.24 (m, 3H), 7.08 (dd,  $J = 4.3, 1.7$  Hz, 2H), 4.45 (ddd,  $J = 10.5, 6.9, 2.4$  Hz, 1H), 4.00 (ddd,  $J = 18.3, 10.5, 4.2$  Hz, 1H), 3.39 (ddd,  $J = 18.3, 11.0, 2.4$  Hz, 1H).

<sup>13</sup>**C NMR** (101 MHz, Chloroform-*d*)  $\delta$  196.30 (d,  $J = 13.2$  Hz), 138.13 (d,  $J = 5.5$  Hz), 136.14, 134.01 (d,  $J = 2.2$  Hz), 133.56, 132.24 (d,  $J = 2.8$  Hz), 131.72 (d,  $J = 2.6$  Hz), 131.25 (d,  $J = 8.5$  Hz), 130.90 (d,  $J = 8.9$  Hz), 130.60 (d,  $J = 21.2$  Hz), 129.95 (d,  $J = 5.6$  Hz), 129.51 (d,  $J = 2.0$  Hz), 129.07 (d,  $J = 11.3$  Hz), 128.64, 128.27 (d,  $J = 12.0$  Hz), 128.13, 127.95 (d,  $J = 5.6$  Hz), 127.34 (d,  $J = 2.5$  Hz), 40.83 (d,  $J = 68.5$  Hz), 38.85.

<sup>31</sup>**P NMR** (162 MHz, Chloroform-*d*)  $\delta$  34.48.

HRMS (ESI<sup>+</sup>,  $m/z$ ): calcd for C<sub>27</sub>H<sub>23</sub>O<sub>2</sub>BrP [M+H]<sup>+</sup>: 489.0614, found: 489.0615.

HPLC analysis: Chiracel-ODH, n-heptane/*i*-PrOH = 90:10, 1 mL/min, 22°C, detection at 254nm. Retention time (min): 7.44 (major) and 9.80 (minor)

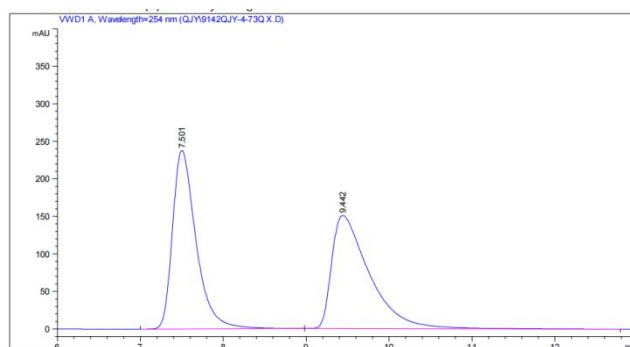

| Peak # | RetTime [min] | Type | Width [min] | Area [mAU*s] | Height [mAU] | Area %  |
|--------|---------------|------|-------------|--------------|--------------|---------|
| 1      | 7.501         | BB   | 0.2993      | 4691.63623   | 237.68604    | 49.5677 |
| 2      | 9.442         | BB   | 0.4675      | 4773.47070   | 150.69827    | 50.4323 |

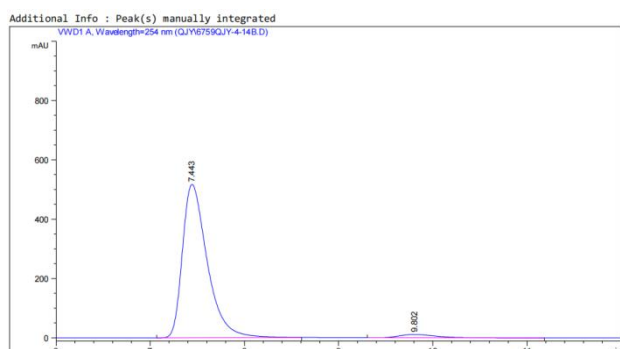

| Peak # | RetTime [min] | Type | Width [min] | Area [mAU*s] | Height [mAU] | Area %  |
|--------|---------------|------|-------------|--------------|--------------|---------|
| 1      | 7.443         | BB   | 0.2782      | 9444.05273   | 516.84033    | 96.8966 |
| 2      | 9.802         | BB   | 0.4109      | 302.47235    | 11.20563     | 3.1034  |

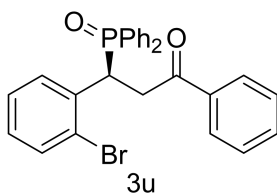

**(S)-3-(2-bromophenyl)-3-(diphenylphosphoryl)-1-phenylpropan-1-one (3v)**

[Purification by flash column chromatography on silica gel (eluent, DCE: MeOH = 70:1). White solid, 90% yield, 99% ee]  $^1\text{H NMR}$  (400 MHz, Chloroform-*d*)  $\delta$  8.12 – 8.02 (m, 2H), 7.89 – 7.81 (m, 2H), 7.58 (m, 3H), 7.53 – 7.44 (m, 1H), 7.43 – 7.24 (m, 6H), 7.19 (td,  $J = 7.7, 3.0$  Hz, 2H), 6.98 (t,  $J = 7.7$  Hz, 1H), 5.10 (ddd,  $J = 10.0, 6.7, 2.8$  Hz, 1H), 4.06 (ddd,  $J = 18.1, 10.5, 5.3$  Hz, 1H), 3.44 (ddd,  $J = 18.2, 9.9, 2.8$  Hz, 1H).

$^{13}\text{C NMR}$  (101 MHz, Chloroform-*d*)  $\delta$  196.27 (d,  $J = 13.2$  Hz), 136.14, 135.76 (d,  $J = 5.2$  Hz), 133.42, 132.74 (d,  $J = 2.0$  Hz), 132.38 (d,  $J = 2.8$  Hz), 131.71 (d,  $J = 2.9$  Hz), 131.57, 131.48, 131.20, 131.10, 130.68 (d,  $J = 42.5$  Hz), 129.95 (d,  $J = 3.8$  Hz), 129.14, 129.03, 128.59, 128.19, 127.92, 127.80, 127.74 (d,  $J = 2.5$  Hz), 126.63 (d,  $J = 7.4$  Hz), 39.79 (d,  $J = 67.6$  Hz), 39.27.

$^{31}\text{P NMR}$  (162 MHz, Chloroform-*d*)  $\delta$  34.69.

HRMS (ESI<sup>+</sup>,  $m/z$ ): calcd for  $\text{C}_{27}\text{H}_{23}\text{O}_2\text{BrP}$   $[\text{M}+\text{H}]^+$ : 489.0614, found: 489.0617

HPLC analysis: Chiracel-ODH, n-heptane/*i*-PrOH = 90:10, 1 mL/min, 22°C, detection at 254 nm. Retention time (min): 8.62 (major) and 13.24 (minor)

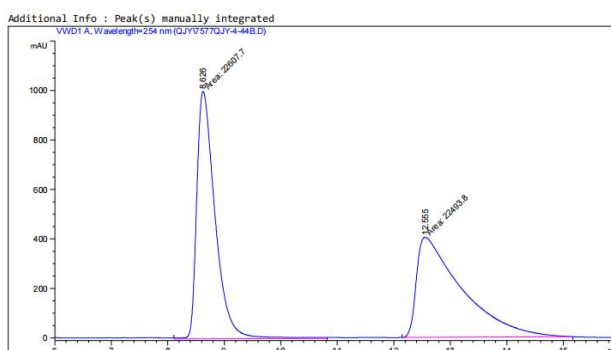

| Peak # | RetTime [min] | Type | Width [min] | Area [mAU*s] | Height [mAU] | Area %  |
|--------|---------------|------|-------------|--------------|--------------|---------|
| 1      | 8.626         | MM   | 0.3768      | 2.26077e4    | 999.97961    | 50.1262 |
| 2      | 12.555        | MM   | 0.9269      | 2.24938e4    | 404.44171    | 49.8738 |

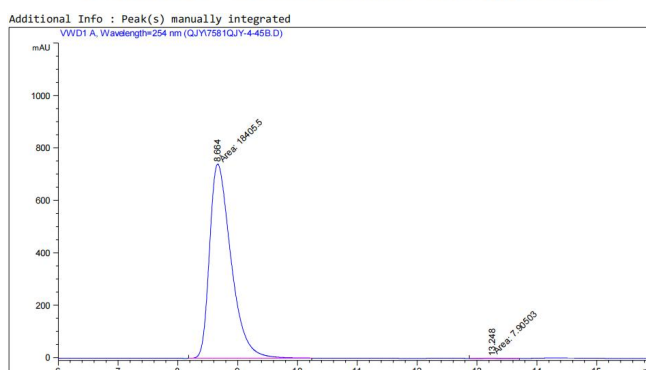

| Peak # | RetTime [min] | Type | Width [min] | Area [mAU*s] | Height [mAU] | Area %  |
|--------|---------------|------|-------------|--------------|--------------|---------|
| 1      | 8.664         | MM   | 0.4145      | 1.84055e4    | 740.09576    | 99.9571 |
| 2      | 13.248        | MM   | 0.3819      | 7.90503      | 3.45020e-1   | 0.0429  |



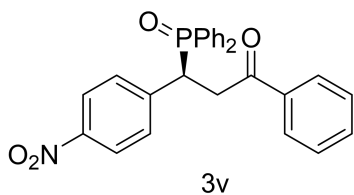

**(S)-3-(diphenylphosphoryl)-3-(4-nitrophenyl)-1-phenylpropan-1-one (3v)<sup>[2]</sup>**

[Purification by flash column chromatography on silica gel (eluent, DCE: MeOH = 70:1). Yellow solid, 85% yield, 87% ee]<sup>1</sup>**H NMR** (400 MHz, Chloroform-*d*)  $\delta$  8.00 – 7.85 (m, 4H), 7.84 – 7.74 (m, 2H), 7.57 – 7.41 (m, 8H), 7.38 – 7.29 (m, 3H), 7.28 – 7.19 (m, 2H), 4.52 (ddd, *J* = 9.3, 6.6, 2.3 Hz, 1H), 3.99 (ddd, *J* = 18.4, 10.7, 3.9 Hz, 1H), 3.37 (ddd, *J* = 18.4, 10.4, 2.4 Hz, 1H).

<sup>13</sup>**C NMR** (101 MHz, Chloroform-*d*)  $\delta$  194.98 (d, *J* = 13.0 Hz), 145.76 (d, *J* = 2.6 Hz), 143.08 (d, *J* = 5.4 Hz), 134.79, 132.76, 131.45 (d, *J* = 2.8 Hz), 130.94 (d, *J* = 2.8 Hz), 130.12, 130.04, 129.67 (d, *J* = 5.7 Hz), 129.60 (d, *J* = 2.1 Hz), 128.23, 128.12, 127.68, 127.49, 127.37, 127.05, 122.35 (d, *J* = 1.9 Hz), 40.27 (d, *J* = 66.9 Hz), 37.81.

<sup>31</sup>**P NMR** (162 MHz, Chloroform-*d*)  $\delta$  33.28.

HRMS (ESI<sup>+</sup>, *m/z*): calcd for C<sub>27</sub>H<sub>22</sub>NO<sub>4</sub>P [M+H]<sup>+</sup>: 455.1286, found: 455.1285.

HPLC analysis: Chiracel-ODH, n-heptane/*i*-PrOH = 90:10, 1 mL/min, 22°C, detection at 254nm. Retention time (min): 11.42 (major) and 20.25 (minor)

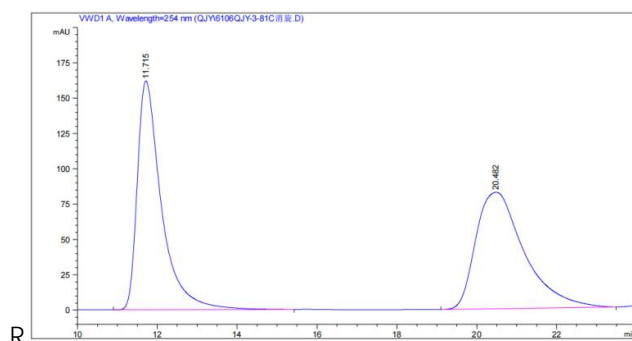

| Peak # | RetTime [min] | Type | Width [min] | Area [mAU*s] | Height [mAU] | Area %  |
|--------|---------------|------|-------------|--------------|--------------|---------|
| 1      | 11.715        | BB   | 0.6228      | 6800.93604   | 161.98839    | 49.5664 |
| 2      | 20.482        | BB   | 1.2632      | 6919.92188   | 82.44920     | 50.4336 |

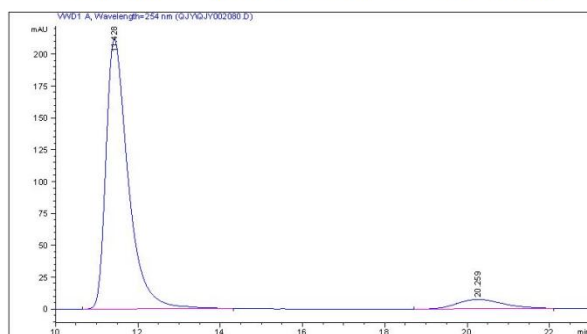

| Peak # | RetTime [min] | Type | Width [min] | Area [mAU*s] | Height [mAU] | Area %  |
|--------|---------------|------|-------------|--------------|--------------|---------|
| 1      | 11.428        | BB   | 0.5659      | 7927.85059   | 211.68414    | 93.3443 |
| 2      | 20.259        | BB   | 1.1355      | 565.27972    | 7.22721      | 6.6557  |

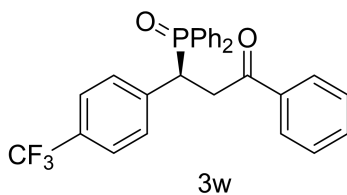

**(S)-3-(diphenylphosphoryl)-1-phenyl-3-(4-(trifluoromethyl)phenyl)propan-1-one (3w)**

[Purification by flash column chromatography on silica gel (eluent, DCE: MeOH =70:1). White solid, 92% yield, 95% ee] <sup>1</sup>H NMR (400 MHz, Chloroform-*d*) δ 8.06 – 7.95 (m, 2H), 7.90 – 7.81 (m, 2H), 7.58 – 7.49 (m, 6H), 7.52 – 7.44 (m, 2H), 7.44 – 7.32 (m, 5H), 7.32 – 7.23 (m, 2H), 4.54 (ddd, *J* = 10.6, 6.8, 2.4 Hz, 1H), 4.04 (ddd, *J* = 18.3, 10.6, 4.2 Hz, 1H), 3.41 (ddd, *J* = 18.3, 10.9, 2.4 Hz, 1H).

<sup>13</sup>C NMR (101 MHz, Chloroform-*d*) δ 196.27 (d, *J* = 13.2 Hz), 140.43 – 140.14 (m), 136.03, 133.66, 132.35 (d, *J* = 2.7 Hz), 131.81 (d, *J* = 2.9 Hz), 131.55, 131.26, 131.17, 130.84, 130.75, 130.55, 130.28, 130.14 (d, *J* = 5.5 Hz), 129.20, 129.09, 128.68, 128.39, 128.28, 128.12, 125.20, 41.03 (d, *J* = 67.9 Hz), 38.86.

<sup>31</sup>P NMR (162 MHz, Chloroform-*d*) δ 34.23.

HRMS (ESI<sup>+</sup>, *m/z*): calcd for C<sub>28</sub>H<sub>23</sub>O<sub>2</sub>F<sub>3</sub>P [M+H]<sup>+</sup> : 479.1382, found: 479.1380.

HPLC analysis: Chiracel-ODH, n-heptane/*i*-PrOH= 90:10, 1 mL/min, 22°C, detection at 254nm. Retention time (min): 6.39 (major) and 9.22(minor)

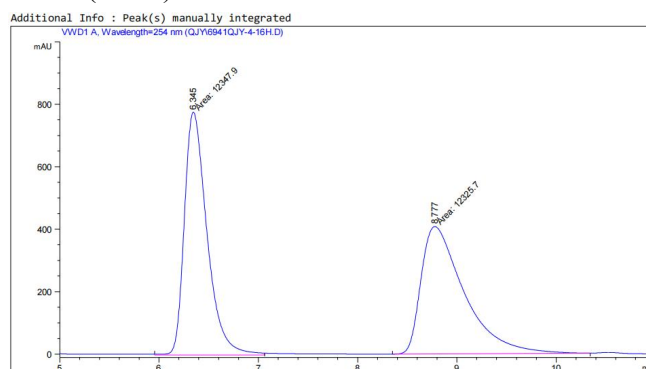

| Peak # | RetTime [min] | Type | Width [min] | Area [mAU*s] | Height [mAU] | Area %  |
|--------|---------------|------|-------------|--------------|--------------|---------|
| 1      | 6.345         | MM   | 0.2647      | 1.23479e4    | 777.58331    | 50.0450 |
| 2      | 8.777         | MM   | 0.5040      | 1.23257e4    | 407.62524    | 49.9550 |

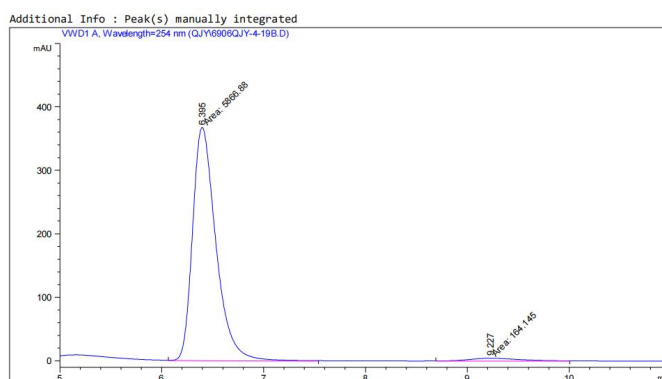

| Peak # | RetTime [min] | Type | Width [min] | Area [mAU*s] | Height [mAU] | Area %  |
|--------|---------------|------|-------------|--------------|--------------|---------|
| 1      | 6.395         | MM   | 0.2661      | 5866.88428   | 367.50113    | 97.2783 |
| 2      | 9.227         | MM   | 0.6106      | 164.14453    | 4.48067      | 2.7217  |

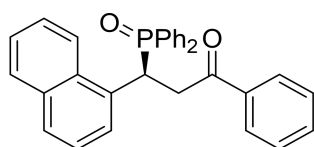

3x

**(S)-3-(diphenylphosphoryl)-3-(naphthalen-1-yl)-1-phenylpropan-1-one (3x)<sup>[2]</sup>**

[Purification by flash column chromatography on silica gel (eluent, DCM: MeOH = 70:1). White solid, 91% yield, 96% ee]<sup>1</sup>**H NMR** (400 MHz, Chloroform-*d*)  $\delta$  8.09 (d,  $J$  = 8.6 Hz, 1H), 7.94 (m, 3H), 7.72 – 7.65 (m, 2H), 7.58 – 7.45 (m, 2H), 7.41 (m, 3H), 7.38 – 7.23 (m, 3H), 7.25 – 7.10 (m, 5H), 6.94 (t,  $J$  = 7.5 Hz, 1H), 6.81 (td,  $J$  = 7.7, 2.9 Hz, 2H), 5.33 (ddd,  $J$  = 9.8, 7.3, 3.0 Hz, 1H), 4.00 (ddd,  $J$  = 18.2, 9.3, 5.5 Hz, 1H), 3.55 (ddd,  $J$  = 18.3, 11.6, 2.9 Hz, 1H).

<sup>13</sup>C NMR (101 MHz, Chloroform-*d*)  $\delta$  196.76 (d,  $J$  = 12.2 Hz), 136.12, 133.49, 133.32, 132.83 (d,  $J$  = 5.4 Hz), 132.11 (d,  $J$  = 2.8 Hz), 132.03 (d,  $J$  = 5.8 Hz), 131.72 (d,  $J$  = 3.9 Hz), 131.50, 131.42, 131.21 (d,  $J$  = 2.8 Hz), 130.74 (d,  $J$  = 2.8 Hz), 130.62, 130.53, 128.99, 128.88, 128.55, 128.47, 128.09, 127.77 (d,  $J$  = 2.5 Hz), 127.69, 127.58, 126.99 (d,  $J$  = 5.5 Hz), 125.95, 125.32 (d,  $J$  = 2.8 Hz), 125.22, 123.00, 40.14, 34.18 (d,  $J$  = 69.3 Hz).

<sup>31</sup>P NMR (162 MHz, CDCl<sub>3</sub>)  $\delta$  34.76.

HRMS (ESI<sup>+</sup>, *m/z*): calcd for C<sub>31</sub>H<sub>26</sub>O<sub>2</sub>P [M+H]<sup>+</sup> : 461.1592, found: 461.1596.

HPLC analysis: Chiracel-ODH, n-heptane/*i*-PrOH =90:10, 1 mL/min, 22°C, detection at 254nm. Retention time (min): 9.16 (major) and 14.20 (minor).

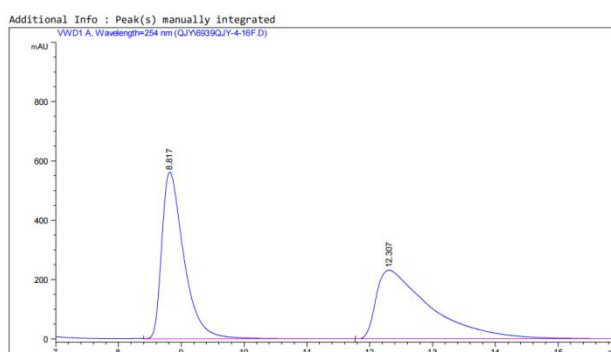

| Peak # | RetTime [min] | Type | Width [min] | Area [mAU*s] | Height [mAU] | Area %  |
|--------|---------------|------|-------------|--------------|--------------|---------|
| 1      | 8.817         | VB   | 0.3702      | 1.37848e4    | 561.83118    | 49.7638 |
| 2      | 12.307        | BBA  | 0.8339      | 1.39156e4    | 231.31133    | 50.2362 |

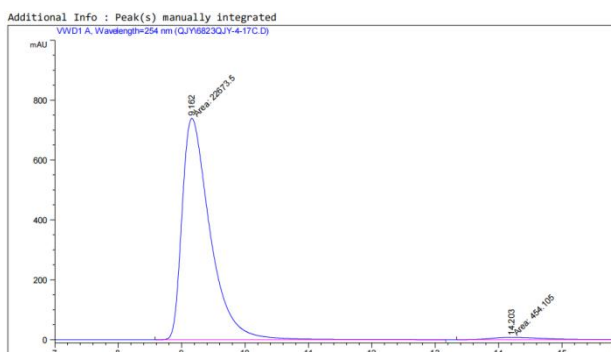

| Peak # | RetTime [min] | Type | Width [min] | Area [mAU*s] | Height [mAU] | Area %  |
|--------|---------------|------|-------------|--------------|--------------|---------|
| 1      | 9.162         | MM   | 0.5115      | 2.26735e4    | 738.75372    | 98.0365 |
| 2      | 14.203        | MM   | 0.9727      | 454.10510    | 7.78059      | 1.9635  |

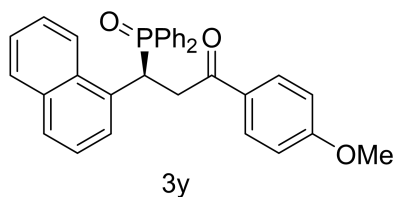

**(S)-3-(diphenylphosphoryl)-1-(4-methoxyphenyl)-3-(naphthalen-1-yl)propan-1-one (3y)**

[Purification by flash column chromatography on silica gel (eluent, DCM: MeOH = 70:1). Yellow solid, 86% yield, 90% ee]<sup>1</sup>H NMR (400 MHz, Chloroform-*d*)  $\delta$  8.14 (d,  $J$  = 8.6 Hz, 1H), 8.03 – 7.94 (m, 3H), 7.72 (d,  $J$  = 8.9 Hz, 2H), 7.61 – 7.52 (m, 2H), 7.45 (m, 3H), 7.38 – 7.28 (m, 2H), 7.25 – 7.15 (m, 3H), 6.97 (td,  $J$  = 7.3, 1.5 Hz, 1H), 6.85 (td,  $J$  = 7.7, 2.9 Hz, 2H), 6.71 (d,  $J$  = 8.9 Hz, 2H), 5.38 (ddd,  $J$  = 9.8, 7.2, 2.9 Hz, 1H), 4.01 (ddd,  $J$  = 18.0, 9.3, 5.5 Hz, 1H), 3.69 (s, 3H), 3.53 (ddd,  $J$  = 18.1, 11.6, 2.9 Hz, 1H).

<sup>13</sup>C NMR (101 MHz, Chloroform-*d*)  $\delta$  195.24 (d,  $J$  = 12.3 Hz), 163.63, 133.55, 133.01 (d,  $J$  = 5.4 Hz), 132.14 (d,  $J$  = 3.1 Hz), 131.86 (d,  $J$  = 6.9 Hz), 131.57, 131.49, 131.23 (d,  $J$  = 2.8 Hz), 130.89, 130.68, 130.58, 130.47, 129.32, 129.03, 128.92, 128.58, 127.77 (d,  $J$  = 5.5 Hz), 127.62, 127.05 (d,  $J$  = 5.8 Hz), 125.99, 125.37 (d,  $J$  = 2.8 Hz), 125.26, 123.14, 113.63, 55.44, 39.74, 34.31 (d,  $J$  = 69.4 Hz).

<sup>31</sup>P NMR (162 MHz, CDCl<sub>3</sub>)  $\delta$  34.66.

HRMS (ESI<sup>+</sup>, *m/z*): calcd for C<sub>32</sub>H<sub>28</sub>O<sub>3</sub>P [M+H]<sup>+</sup> : 491.1771, found: 491.1776.

HPLC analysis: Chiracel-ODH, n-heptane/*i*-PrOH = 90:10, 1 mL/min, 22°C, detection at 254nm. Retention time (min): 15.17 (major) and 19.84 (minor)

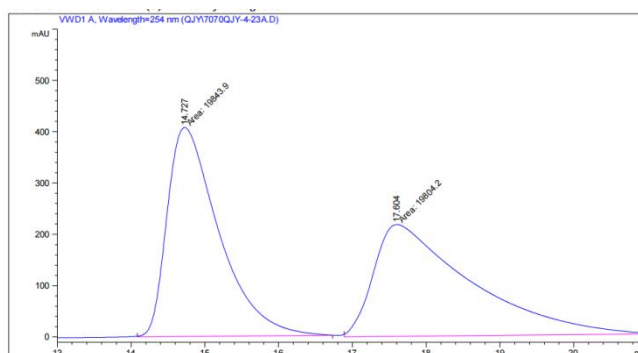

| Peak # | RetTime [min] | Type | Width [min] | Area [mAU*s] | Height [mAU] | Area %  |
|--------|---------------|------|-------------|--------------|--------------|---------|
| 1      | 14.727        | MM   | 0.8123      | 1.98439e4    | 407.14825    | 50.0501 |
| 2      | 17.604        | MM   | 1.5143      | 1.98042e4    | 217.97450    | 49.9499 |

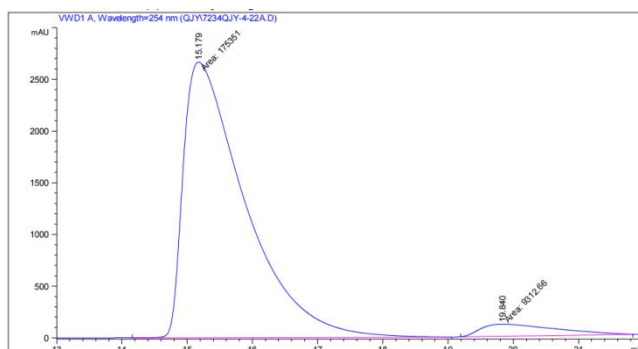

| Peak # | RetTime [min] | Type | Width [min] | Area [mAU*s] | Height [mAU] | Area %  |
|--------|---------------|------|-------------|--------------|--------------|---------|
| 1      | 15.179        | MM   | 1.0964      | 1.75351e5    | 2665.57568   | 94.9570 |
| 2      | 19.840        | MM   | 1.3338      | 9312.65820   | 116.37004    | 5.0430  |

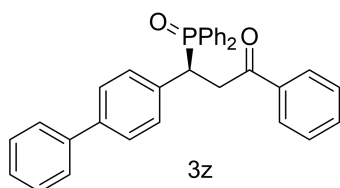

**(S)-3-([1,1'-biphenyl]-4-yl)-3-(diphenylphosphoryl)-1-phenylpropan-1-one (3z)**

[Purification by flash column chromatography on silica gel (eluent, DCM: MeOH = 70:1). White solid, 84% yield, 97% ee]<sup>1</sup>H NMR (400 MHz, Chloroform-*d*)  $\delta$  8.04 (m, 2H), 7.90 (d,  $J = 7.2$  Hz, 2H), 7.59 – 7.47 (m, 11H), 7.44 – 7.37 (m, 6H), 7.34 – 7.26 (m, 3H), 4.57 (ddd,  $J = 9.8, 6.9, 2.4$  Hz, 1H), 4.11 (ddd,  $J = 18.2, 10.5, 4.3$  Hz, 1H), 3.45 (ddd,  $J = 18.2, 11.0, 2.4$  Hz, 1H).

<sup>13</sup>C NMR (101 MHz, Chloroform-*d*)  $\delta$  196.69 (d,  $J = 13.3$  Hz), 140.57, 139.71 (d,  $J = 2.7$  Hz), 136.31, 134.97 (d,  $J = 5.8$  Hz), 133.48, 132.65 (d,  $J = 2.9$  Hz), 132.13 (d,  $J = 2.8$  Hz), 131.56 (d,  $J = 2.8$  Hz), 131.36, 131.27, 131.06, 130.97, 130.74 (d,  $J = 11.5$  Hz), 130.25, 130.19, 129.09, 129.02, 128.97, 128.90, 128.72, 128.62, 128.25, 128.16, 128.14, 127.23, 126.99 (d,  $J = 2.1$  Hz), 126.93, 40.74 (d,  $J = 68.9$  Hz), 38.95.

<sup>31</sup>P NMR (162 MHz, CDCl<sub>3</sub>)  $\delta$  34.56.

HRMS (ESI<sup>+</sup>, *m/z*): calcd for C<sub>33</sub>H<sub>28</sub>O<sub>2</sub>P [M+H]<sup>+</sup> : 487,1821, found:487.1824.

HPLC analysis: Chiracel-ODH, *n*-heptane/*i*-PrOH = 90:10, 1 mL/min, 22°C, detection at 254nm. Retention time (min):10.54 (major) and 14.25 (minor)

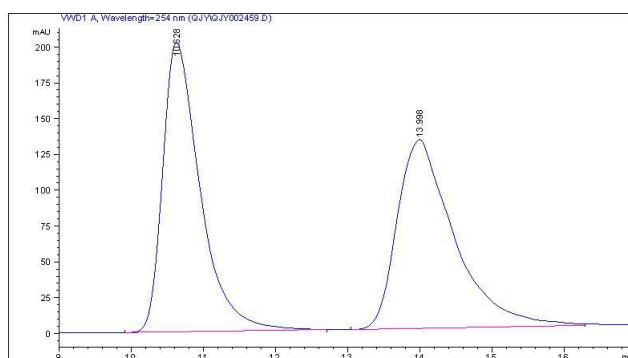

| Peak # | RetTime [min] | Type | Width [min] | Area [mAU*s] | Height [mAU] | Area %  |
|--------|---------------|------|-------------|--------------|--------------|---------|
| 1      | 10.628        | BB   | 0.5373      | 7268.51855   | 201.75163    | 50.0824 |
| 2      | 13.998        | BV   | 0.7921      | 7244.61475   | 131.82991    | 49.9176 |

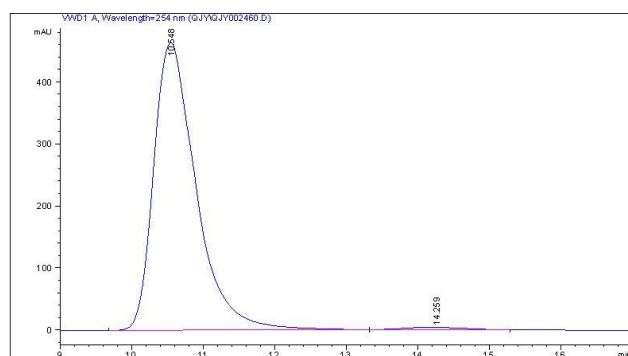

| Peak # | RetTime [min] | Type | Width [min] | Area [mAU*s] | Height [mAU] | Area %  |
|--------|---------------|------|-------------|--------------|--------------|---------|
| 1      | 10.548        | BB   | 0.6057      | 1.90353e4    | 463.90405    | 98.8576 |
| 2      | 14.259        | BB   | 0.6798      | 219.96745    | 4.06184      | 1.1424  |

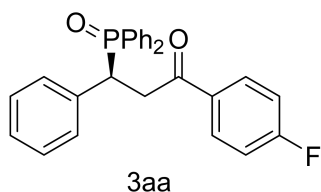

**(S)-3-(diphenylphosphoryl)-1-(4-fluorophenyl)-3-phenylpropan-1-one (3aa)**

[Purification by flash column chromatography on silica gel (eluent, DCM: MeOH = 70:1). White solid, 89% yield, 96% ee] <sup>1</sup>H NMR (400 MHz, Chloroform-*d*) δ 7.98 (m, 2H), 7.90 – 7.84 (m, 2H), 7.56 – 7.41 (m, 5H), 7.41 – 7.30 (m, 3H), 7.24 (m, 2H), 7.20 – 7.06 (m, 3H), 7.04 (t, *J* = 8.6 Hz, 2H), 4.45 (ddd, *J* = 9.9, 6.9, 2.5 Hz, 1H), 3.98 (ddd, *J* = 18.0, 10.3, 4.5 Hz, 1H), 3.36 (ddd, *J* = 18.0, 11.1, 2.5 Hz, 1H).

<sup>13</sup>C NMR (101 MHz, Chloroform-*d*) δ 195.20 (d, *J* = 13.4 Hz), 167.13, 164.59, 135.80 (d, *J* = 5.6 Hz), 132.79, 132.13 (d, *J* = 2.8 Hz), 131.84 (d, *J* = 22.3 Hz), 131.51 (d, *J* = 2.8 Hz), 131.34, 131.25, 131.00, 130.91, 130.87, 130.78, 129.83, 129.77, 129.06, 128.95, 128.37 (d, *J* = 1.9 Hz), 128.18, 128.07, 127.16 (d, *J* = 2.5 Hz), 115.81, 115.59, 41.09 (d, *J* = 69.0 Hz), 38.86.

<sup>31</sup>P NMR (162 MHz, CDCl<sub>3</sub>) δ 34.25.

HRMS (ESI<sup>+</sup>, *m/z*): calcd for C<sub>27</sub>H<sub>23</sub>O<sub>2</sub>FP [M+H]<sup>+</sup> : 429.1414, found: 429.1418.

HPLC analysis: Chiracel-ODH, n-heptane/*i*-PrOH = 90:10, 1 mL/min, 22°C, detection at 254nm. Retention time (min): 8.67 (major) and 10.73(minor).

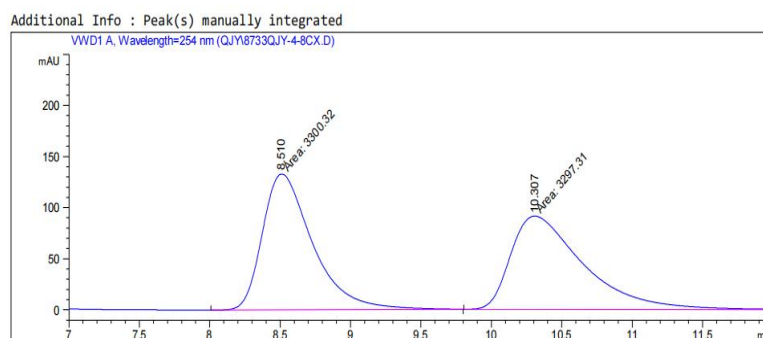

| Peak # | RetTime [min] | Type | Width [min] | Area [mAU*s] | Height [mAU] | Area %  |
|--------|---------------|------|-------------|--------------|--------------|---------|
| 1      | 8.510         | MM   | 0.4136      | 3300.32349   | 133.00629    | 50.0228 |
| 2      | 10.307        | MM   | 0.6019      | 3297.31470   | 91.29690     | 49.9772 |

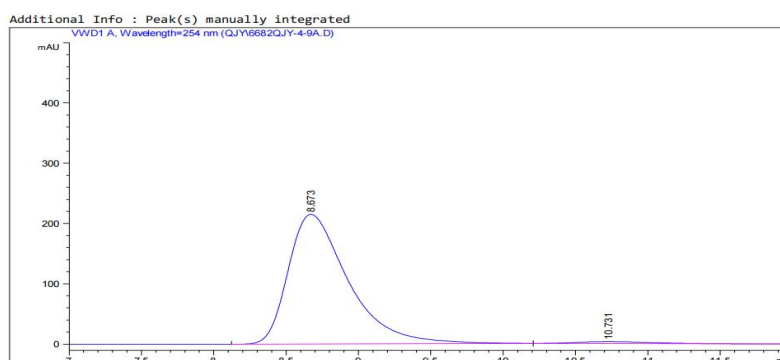

| Peak # | RetTime [min] | Type | Width [min] | Area [mAU*s] | Height [mAU] | Area %  |
|--------|---------------|------|-------------|--------------|--------------|---------|
| 1      | 8.673         | BB   | 0.4346      | 6185.82861   | 215.01453    | 98.0406 |
| 2      | 10.731        | BB   | 0.5900      | 123.62520    | 3.14936      | 1.9594  |

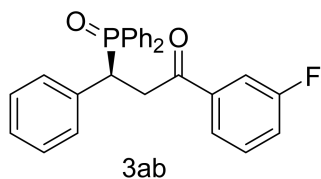

**(S)-3-(diphenylphosphoryl)-1-(3-fluorophenyl)-3-phenylpropan-1-one(3ab)**

[Purification by flash column chromatography on silica gel (eluent, DCM: MeOH =70:1). White soild, 90% yield, 98% ee] <sup>1</sup>H NMR (400 MHz, Chloroform-*d*) δ 8.02 – 7.94 (m, 2H), 7.89 – 7.80 (m, 2H), 7.50 (m, 7H), 7.41 – 7.33 (m, 4H), 7.33 – 7.24 (m, 2H), 7.23 (m, 1H), 7.02 (t, *J* = 7.8 Hz, 1H), 4.44 (ddd, *J* = 9.8, 6.9, 2.4 Hz, 1H), 3.99 (ddd, *J* = 18.3, 10.4, 4.2 Hz, 1H), 3.39 (ddd, *J* = 18.3, 11.0, 2.4 Hz, 1H).

<sup>13</sup>C NMR (101 MHz, Chloroform-*d*) δ 196.29 (d, *J* = 13.1 Hz), 138.39 (d, *J* = 5.4 Hz), 136.13, 133.57, 132.85 (d, *J* = 5.7 Hz), 132.26 (d, *J* = 2.8 Hz), 131.74 (d, *J* = 2.8 Hz), 131.53 (d, *J* = 27.5 Hz), 131.30, 131.21, 130.95, 130.86, 130.56 (d, *J* = 22.2 Hz), 130.26 (d, *J* = 2.5 Hz), 129.81 (d, *J* = 2.0 Hz), 129.13, 129.02, 128.65, 128.36 (d, *J* = 4.1 Hz), 128.22, 128.14, 122.23 (d, *J* = 2.2 Hz), 40.82 (d, *J* = 68.4 Hz), 38.82.

<sup>31</sup>P NMR (162 MHz, CDCl<sub>3</sub>) δ 34.08.

HRMS (ESI<sup>+</sup>, *m/z*): calcd for C<sub>27</sub>H<sub>23</sub>O<sub>2</sub>FP [M+H]<sup>+</sup> : 429.1414, found: 429.1411.

HPLC analysis: Chiracel-ODH, n-heptane/*i*-PrOH= 90:10, 1 mL/min, 22°C, detection at 254nm. Retention time (min): 7.69 (major) and 9.98 (minor)

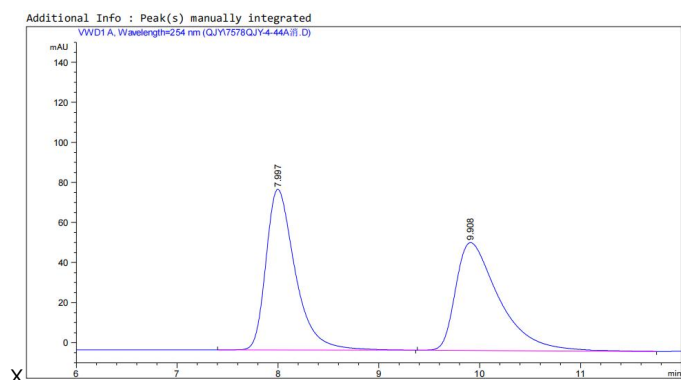

| Peak # | RetTime [min] | Type | Width [min] | Area [mAU*s] | Height [mAU] | Area %  |
|--------|---------------|------|-------------|--------------|--------------|---------|
| 1      | 7.997         | BB   | 0.3045      | 1611.79956   | 80.18473     | 50.1043 |
| 2      | 9.908         | BB   | 0.4459      | 1605.08850   | 53.82476     | 49.8957 |

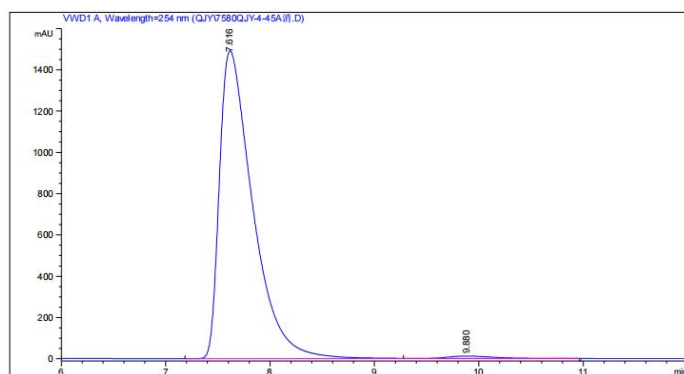

| Peak # | RetTime [min] | Type | Width [min] | Area [mAU*s] | Height [mAU] | Area %  |
|--------|---------------|------|-------------|--------------|--------------|---------|
| 1      | 7.616         | BV R | 0.3321      | 3.29937e4    | 1491.26257   | 98.8961 |
| 2      | 9.880         | VB E | 0.4630      | 368.28882    | 12.00197     | 1.1039  |

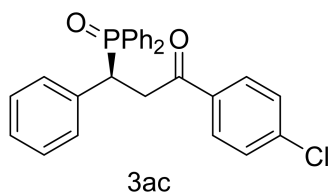

**(S)-1-(4-chlorophenyl)-3-(diphenylphosphoryl)-3-phenylpropan-1-one (3ac)**

[Purification by flash column chromatography on silica gel (eluent, DCM:MeOH = 70:1). White solid, 87% yield, 96% ee] <sup>1</sup>H NMR (400 MHz, Chloroform-*d*) δ 8.01 – 7.91 (m, 2H), 7.76 (d, *J* = 8.6 Hz, 2H), 7.51 (m, 3H), 7.46 – 7.39 (m, 2H), 7.35 – 7.27 (m, 5H), 7.23 (m, 2H), 7.17 – 7.07 (m, 3H), 4.43 (ddd, *J* = 9.8, 6.8, 2.6 Hz, 1H), 3.97 (ddd, *J* = 18.1, 10.4, 4.7 Hz, 1H), 3.32 (ddd, *J* = 18.1, 11.0, 2.6 Hz, 1H).

<sup>13</sup>C NMR (101 MHz, Chloroform-*d*) δ 195.67 (d, *J* = 13.4 Hz), 139.90, 135.55 (d, *J* = 5.8 Hz), 134.61, 132.72 (d, *J* = 2.9 Hz), 132.23 (d, *J* = 2.7 Hz), 131.62 (d, *J* = 2.4 Hz), 131.29, 131.20, 130.97, 130.88, 130.73 (d, *J* = 11.6 Hz), 129.78, 129.72, 129.57, 129.12, 129.01, 128.89, 128.39 (d, *J* = 2.1 Hz), 128.23, 128.11, 127.23 (d, *J* = 2.5 Hz), 41.07 (d, *J* = 69.0 Hz), 38.76.

<sup>31</sup>P NMR (162 MHz, CDCl<sub>3</sub>) δ 34.12.

HRMS (ESI<sup>+</sup>, *m/z*): calcd for C<sub>27</sub>H<sub>23</sub>O<sub>2</sub>ClP [M+H]<sup>+</sup>: 445.1119, found: 445.1114.

HPLC analysis: Chiracel-ODH, n-heptane/*i*-PrOH = 90:10, 1 mL/min, 22°C, detection at 254nm. Retention time (min): 7.75 (major) and 10.46 (minor).

Additional Info : Peak(s) manually integrated

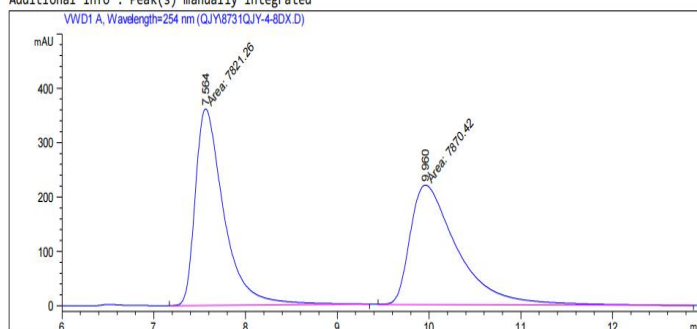

| Peak # | RetTime [min] | Type | Width [min] | Area [mAU*s] | Height [mAU] | Area %  |
|--------|---------------|------|-------------|--------------|--------------|---------|
| 1      | 7.564         | MM   | 0.3611      | 7821.26221   | 361.01724    | 49.8434 |
| 2      | 9.960         | MM   | 0.5975      | 7870.42090   | 219.52318    | 50.1566 |

Additional Info : Peak(s) manually integrated

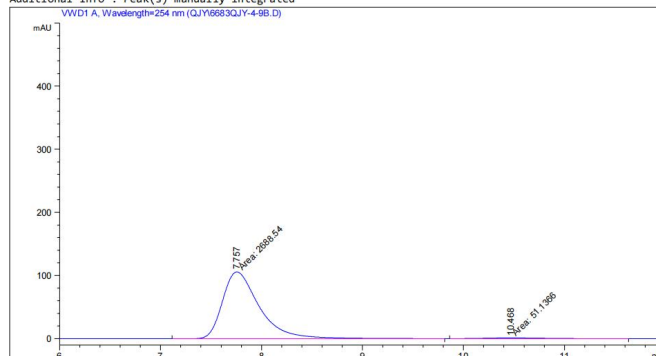

| Peak # | RetTime [min] | Type | Width [min] | Area [mAU*s] | Height [mAU] | Area %  |
|--------|---------------|------|-------------|--------------|--------------|---------|
| 1      | 7.757         | MM   | 0.4235      | 2688.53760   | 105.81068    | 98.1335 |
| 2      | 10.468        | MM   | 0.6948      | 51.13657     | 1.22672      | 1.8665  |



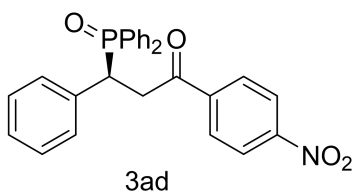

**(S)-3-(diphenylphosphoryl)-1-(4-nitrophenyl)-3-phenylpropan-1-one (3ad)<sup>[2]</sup>**

[Purification by flash column chromatography on silica gel (eluent, DCM: MeOH = 70:1). Yellow solid, 86% yield, 98% ee]<sup>1</sup>**H NMR** (400 MHz, Chloroform-*d*)  $\delta$  8.25 – 8.17 (m, 2H), 8.03 – 7.91 (m, 4H), 7.60 – 7.48 (m, 3H), 7.51 – 7.41 (m, 2H), 7.36 (m, 3H), 7.30 – 7.22 (m, 2H), 7.21 – 7.08 (m, 3H), 4.43 (ddd,  $J = 10.0, 7.0, 2.8$  Hz, 1H), 4.02 (ddd,  $J = 18.1, 10.2, 5.1$  Hz, 1H), 3.45 (ddd,  $J = 18.1, 10.7, 2.8$  Hz, 1H).

<sup>13</sup>**C NMR** (101 MHz, Chloroform-*d*)  $\delta$  195.61 (d,  $J = 13.3$  Hz), 150.34, 140.68, 135.48 (d,  $J = 5.6$  Hz), 132.27 (d,  $J = 2.7$  Hz), 131.66 (d,  $J = 2.8$  Hz), 131.54 (d,  $J = 3.4$  Hz), 131.33, 131.25, 131.02, 130.93, 130.57 (d,  $J = 3.0$  Hz), 129.74, 129.69, 129.18, 129.13, 129.02, 128.48 (d,  $J = 2.0$  Hz), 128.25, 128.13, 127.36 (d,  $J = 2.5$  Hz), 123.80, 41.23 (d,  $J = 68.6$  Hz), 39.56.

<sup>31</sup>**P NMR** (162 MHz, CDCl<sub>3</sub>)  $\delta$  34.08.

HRMS (ESI<sup>+</sup>,  $m/z$ ): calcd for C<sub>27</sub>H<sub>22</sub>O<sub>4</sub>NP [M+H]<sup>+</sup> : 456.1286, found: 456.1247.

HPLC analysis: Chiracel-ODH, n-heptane/*i*-PrOH =90:10, 1 mL/min, 22°C, detection at 254nm. Retention time (min): 27.19 (major) and 33.64 (minor)

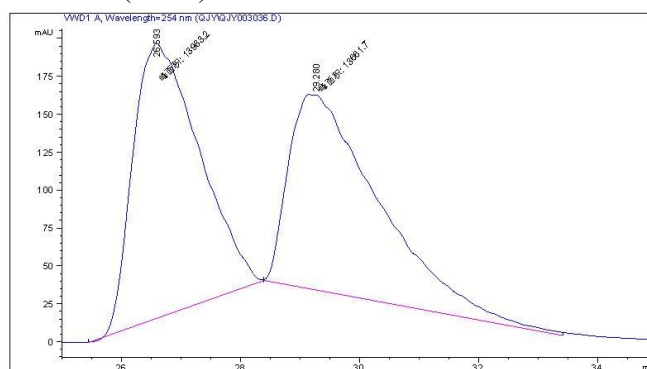

| Peak # | RetTime [min] | Type | Width [min] | Area [mAU*s] | Height [mAU] | Area %  |
|--------|---------------|------|-------------|--------------|--------------|---------|
| 1      | 26.593        | MM   | 1.2849      | 1.39832e4    | 181.38112    | 50.5815 |
| 2      | 29.280        | MM   | 1.7683      | 1.36617e4    | 128.76357    | 49.4185 |

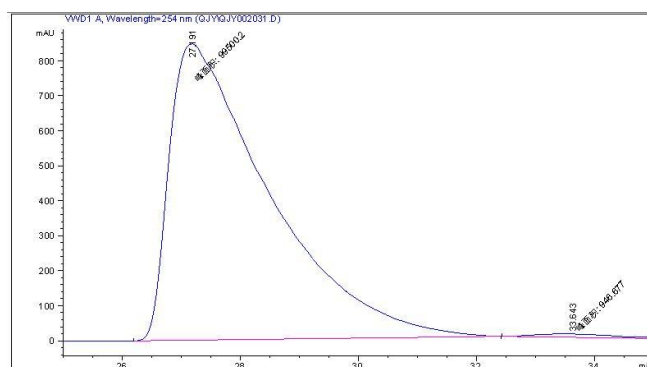

| Peak # | RetTime [min] | Type | Width [min] | Area [mAU*s] | Height [mAU] | Area %  |
|--------|---------------|------|-------------|--------------|--------------|---------|
| 1      | 27.191        | MM   | 1.9597      | 9.95002e4    | 846.23236    | 99.0575 |
| 2      | 33.643        | MM   | 1.6812      | 946.67712    | 9.38499      | 0.9425  |

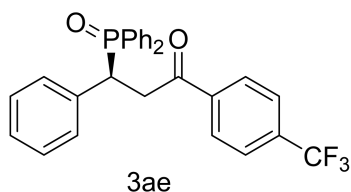

**(S)-3-(diphenylphosphoryl)-3-phenyl-1-(4-(trifluoromethyl)phenyl)propan-1-one (3ae)**

[Purification by flash column chromatography on silica gel (eluent, DCM: MeOH =70:1). White solid, 95% yield, 96% ee] <sup>1</sup>H NMR (400 MHz, Chloroform-*d*) δ 8.05 – 7.96 (m, 2H), 7.93 (d, *J* = 8.2 Hz, 2H), 7.63 (d, *J* = 8.2 Hz, 2H), 7.55 – 7.44 (m, 5H), 7.41 – 7.31 (m, 3H), 7.25 (m, 2H), 7.19 – 7.09 (m, 3H), 4.46 (ddd, *J* = 9.9, 6.9, 2.6 Hz, 1H), 4.03 (ddd, *J* = 18.2, 10.3, 4.8 Hz, 1H), 3.43 (ddd, *J* = 18.2, 10.9, 2.6 Hz, 1H).

<sup>13</sup>C NMR (101 MHz, Chloroform-*d*) δ 195.99 (d, *J* = 13.3 Hz), 138.92, 135.62 (d, *J* = 5.6 Hz), 134.57 (d, *J* = 32.7 Hz), 132.20 (d, *J* = 2.7 Hz), 131.76, 131.59 (d, *J* = 3.0 Hz), 131.33, 131.25, 131.01, 130.93, 130.78 (d, *J* = 3.3 Hz), 130.68, 129.79, 129.73, 129.10, 128.99, 128.48, 128.43 (d, *J* = 1.9 Hz), 128.22, 128.10, 127.26 (d, *J* = 2.3 Hz), 125.64 (q, *J* = 3.8 Hz), 41.12 (d, *J* = 68.8 Hz), 39.31.

<sup>31</sup>P NMR (162 MHz, CDCl<sub>3</sub>) δ 34.25.

HRMS (ESI<sup>+</sup>, *m/z*): calcd for C<sub>28</sub>H<sub>23</sub>O<sub>2</sub>F<sub>3</sub>P [M+H]<sup>+</sup> : 479.1382, found: 479.1380.

HPLC analysis: Chiracel-ODH, n-heptane/*i*-PrOH =90:10, 1 mL/min, 22°C, detection at 254nm. Retention time (min): 8.51 (major) and 9.85 (minor).

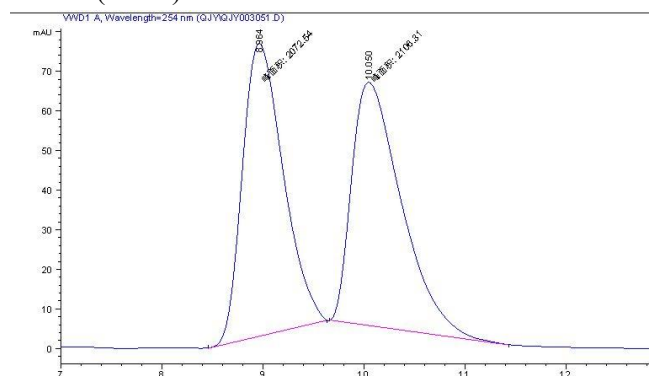

| Peak # | RetTime [min] | Type | Width [min] | Area [mAU*s] | Height [mAU] | Area %  |
|--------|---------------|------|-------------|--------------|--------------|---------|
| 1      | 8.964         | MM   | 0.4676      | 2072.53955   | 73.86913     | 49.5959 |
| 2      | 10.050        | MM   | 0.5720      | 2106.31079   | 61.37356     | 50.4041 |

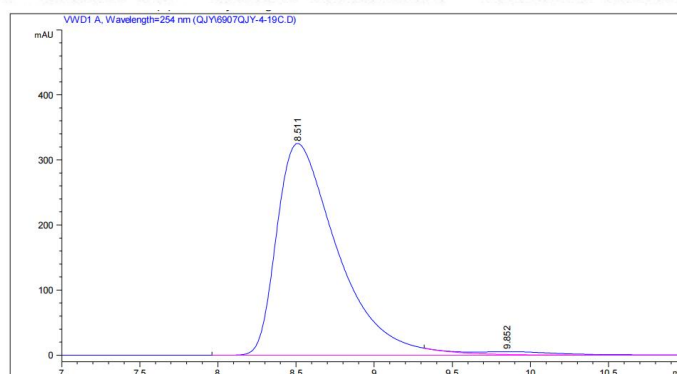

| Peak # | RetTime [min] | Type | Width [min] | Area [mAU*s] | Height [mAU] | Area %  |
|--------|---------------|------|-------------|--------------|--------------|---------|
| 1      | 8.511         | BV R | 0.4096      | 8855.49121   | 325.26755    | 97.9521 |
| 2      | 9.852         | VB E | 0.5925      | 185.14598    | 4.37681      | 2.0479  |

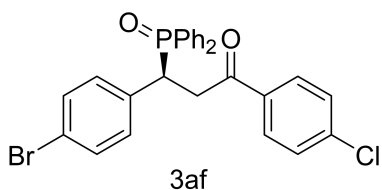

**(S)-3-(4-bromophenyl)-1-(4-chlorophenyl)-3-(diphenylphosphoryl)propan-1-one(3af)**

[Purification by flash column chromatography on silica gel (eluent, DCM: MeOH =70:1). White solid, 97% yield, 98% ee] <sup>1</sup>H NMR (400 MHz, Chloroform-*d*) δ 8.10 – 7.91 (m, 2H), 7.89 – 7.81 (m, 2H), 7.60 – 7.42 (m, 5H), 7.40 – 7.33 (m, 1H), 7.29-7.20 (m, 6H), 7.03 (t, *J* = 8.6 Hz, 2H), 4.68 – 4.31 (m, 1H), 3.93 (ddd, *J* = 18.1, 10.5, 4.4 Hz, 1H), 3.34 (ddd, *J* = 18.2, 10.7, 2.5 Hz, 1H).

<sup>13</sup>C NMR (101 MHz, Chloroform-*d*) δ 194.99 (d, *J* = 13.5 Hz), 167.23, 164.69, 134.74 (d, *J* = 5.6 Hz), 132.56 (d, *J* = 2.9 Hz), 132.40 (d, *J* = 2.7 Hz), 131.89 (d, *J* = 2.9 Hz), 131.48 (d, *J* = 2.0 Hz), 131.40, 131.35, 131.17, 131.08, 130.92, 130.84 (d, *J* = 3.3 Hz), 130.77, 130.11 (d, *J* = 13.1 Hz), 129.21, 129.10, 128.45, 128.33, 121.33 (d, *J* = 3.1 Hz), 115.90, 115.68, 49.54 (dt, *J* = 43.0, 21.5 Hz), 40.52 (d, *J* = 68.8 Hz), 38.53.

<sup>31</sup>P NMR (162 MHz, CDCl<sub>3</sub>) δ 34.24.

HRMS (ESI<sup>+</sup>, *m/z*): calcd for C<sub>27</sub>H<sub>22</sub>O<sub>2</sub>BrClP [M+H]<sup>+</sup> : 523.0151, found: 523.0152.

HPLC analysis: Chiracel-ODH, n-heptane/*i*-PrOH =90:10, 1 mL/min, 22°C, detection at 254nm. Retention time (min): 8.08 (major) and 10.69 (minor).

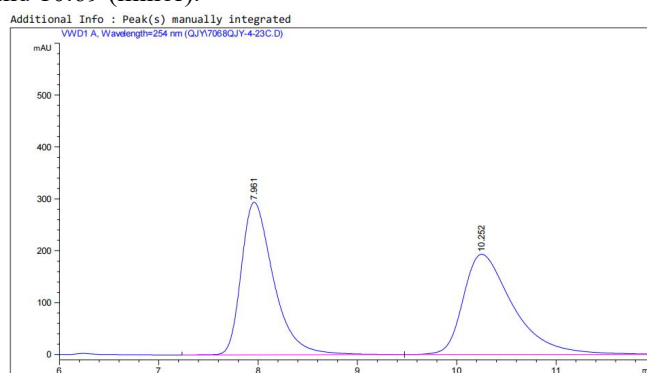

| Peak # | RetTime [min] | Type | Width [min] | Area [mAU*s] | Height [mAU] | Area %  |
|--------|---------------|------|-------------|--------------|--------------|---------|
| 1      | 7.961         | BB   | 0.3430      | 6625.76563   | 293.94424    | 49.3381 |
| 2      | 10.252        | BB   | 0.5277      | 6803.53223   | 193.27744    | 50.6619 |

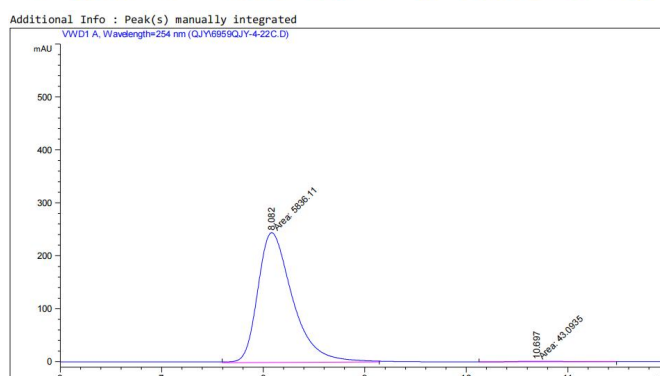

| Peak # | RetTime [min] | Type | Width [min] | Area [mAU*s] | Height [mAU] | Area %  |
|--------|---------------|------|-------------|--------------|--------------|---------|
| 1      | 8.082         | MM   | 0.3970      | 5836.11230   | 245.01759    | 99.2670 |
| 2      | 10.697        | MM   | 0.5951      | 43.09346     | 1.20698      | 0.7330  |

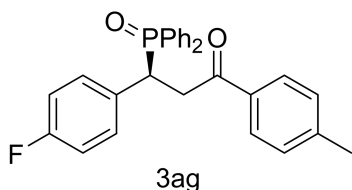

**(S)-3-(diphenylphosphoryl)-3-(4-fluorophenyl)-1-(p-tolyl)propan-1-one (3ag)**

[Purification by flash column chromatography on silica gel (eluent, DCM: MeOH = 70:1). White solid, 94% yield, 95% ee] <sup>1</sup>H NMR (400 MHz, Chloroform-*d*) δ 8.02 – 7.93 (m, 2H), 7.74 (d, *J* = 8.3 Hz, 2H), 7.54 – 7.45 (m, 5H), 7.41 – 7.31 (m, 3H), 7.30 – 7.24 (m, 2H), 7.17 (d, *J* = 8.0 Hz, 2H), 6.83 (t, *J* = 8.7 Hz, 2H), 4.46 (ddd, *J* = 10.6, 6.7, 2.3 Hz, 1H), 3.96 (ddd, *J* = 18.1, 10.6, 4.1 Hz, 1H), 3.32 (ddd, *J* = 18.0, 10.8, 2.4 Hz, 1H).

<sup>13</sup>C NMR (101 MHz, Chloroform-*d*) δ 196.18 (d, *J* = 13.5 Hz), 163.08 (d, *J* = 2.6 Hz), 160.63 (d, *J* = 2.6 Hz), 144.46, 133.79, 132.16 (d, *J* = 2.8 Hz), 131.70 (dd, *J* = 5.6, 3.2 Hz), 131.59, 131.56, 131.42, 131.36 (d, *J* = 2.4 Hz), 131.27, 131.19, 130.91, 130.82, 129.30, 129.10, 128.99, 128.29, 128.24, 128.17, 115.35 (d, *J* = 1.9 Hz), 115.14 (d, *J* = 2.0 Hz), 40.25 (d, *J* = 69.5 Hz), 38.85, 21.65.

<sup>31</sup>P NMR (162 MHz, CDCl<sub>3</sub>) δ 34.44.

HRMS (ESI<sup>+</sup>, *m/z*): calcd for C<sub>28</sub>H<sub>25</sub>FO<sub>2</sub>P [M+H]<sup>+</sup> : 443.1571, found 443.1574.

HPLC analysis: Chiracel-ODH, n-heptane/*i*-PrOH = 90:10, 1 mL/min, 22°C, detection at 254nm. Retention time (min): 7.64(major) and 8.94 (minor).

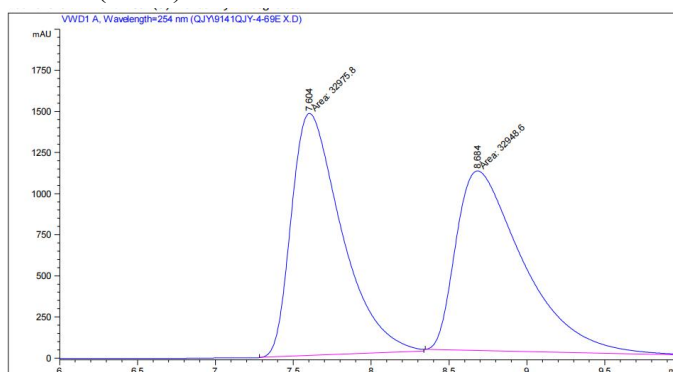

| Peak # | RetTime [min] | Type | Width [min] | Area [mAU*s] | Height [mAU] | Area %  |
|--------|---------------|------|-------------|--------------|--------------|---------|
| 1      | 7.501         | BB   | 0.2993      | 4691.63623   | 237.68604    | 49.5677 |
| 2      | 9.442         | BB   | 0.4675      | 4773.47070   | 150.69827    | 50.4323 |

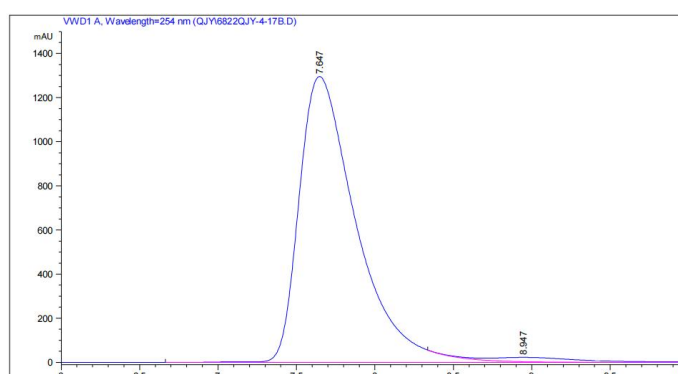

| Peak # | RetTime [min] | Type | Width [min] | Area [mAU*s] | Height [mAU] | Area %  |
|--------|---------------|------|-------------|--------------|--------------|---------|
| 1      | 7.647         | WV R | 0.3794      | 3.27503e4    | 1296.07996   | 97.2331 |
| 2      | 8.947         | VB E | 0.6559      | 931.95990    | 19.80801     | 2.7669  |

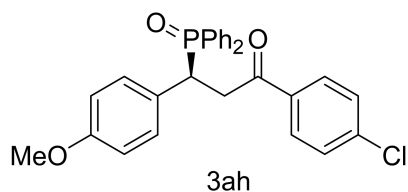

**(S)-1-(4-chlorophenyl)-3-(diphenylphosphoryl)-3-(4-methoxyphenyl)propan-1-one (3ah)**

[Purification by flash column chromatography on silica gel (eluent, DCM: MeOH = 70:1). White solid, 93% yield, 97% ee]<sup>1</sup>H NMR (400 MHz, Chloroform-*d*) δ 8.00 – 7.92 (m, 2H), 7.76 (d, *J* = 8.6 Hz, 2H), 7.54 – 7.45 (m, 5H), 7.40 – 7.22 (m, 7H), 6.69 (d, *J* = 8.7 Hz, 2H), 4.40 (ddd, *J* = 9.9, 6.9, 2.5 Hz, 1H), 3.92 (ddd, *J* = 17.9, 10.5, 4.5 Hz, 1H), 3.68 (s, 3H), 3.31 (ddd, *J* = 18.0, 10.6, 2.5 Hz, 1H).

<sup>13</sup>C NMR (101 MHz, Chloroform-*d*) δ 195.73 (d, *J* = 13.6 Hz), 158.53 (d, *J* = 2.3 Hz), 139.79, 134.65, 132.02 (d, *J* = 2.3 Hz), 131.84, 131.44 (d, *J* = 2.7 Hz), 131.25, 131.16, 130.98, 130.89, 130.77, 130.71, 129.49, 128.99, 128.88, 128.82, 128.18, 128.06, 127.50 (d, *J* = 5.7 Hz), 113.76 (d, *J* = 1.8 Hz), 55.06, 40.13 (d, *J* = 69.9 Hz), 38.98.

<sup>31</sup>P NMR (162 MHz, CDCl<sub>3</sub>) δ 34.24.

HRMS (ESI<sup>+</sup>, *m/z*): calcd for C<sub>28</sub>H<sub>25</sub>O<sub>3</sub>ClP [M+H]<sup>+</sup> : 475.1224, found: 475.1221.

HPLC analysis: Chiracel-ODH, n-heptane/*i*-PrOH =90:10, 1 mL/min, 22°C, detection at 254nm. Retention time (min): 11.76 (major) and 15.09 (minor).

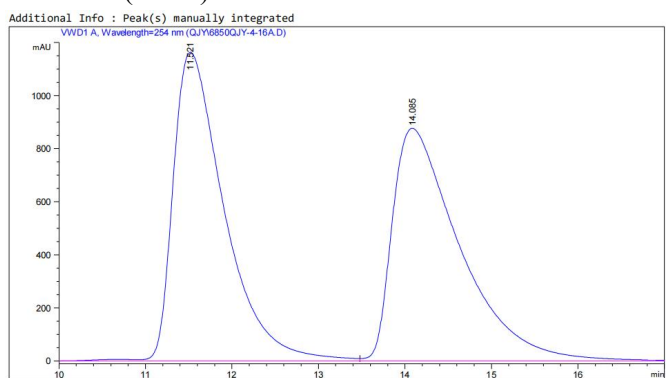

| Peak # | RetTime [min] | Type | Width [min] | Area [mAU*s] | Height [mAU] | Area %  |
|--------|---------------|------|-------------|--------------|--------------|---------|
| 1      | 11.521        | VV R | 0.6151      | 4.77359e4    | 1162.39478   | 50.0109 |
| 2      | 14.085        | VBA  | 0.8073      | 4.77151e4    | 876.19025    | 49.9891 |

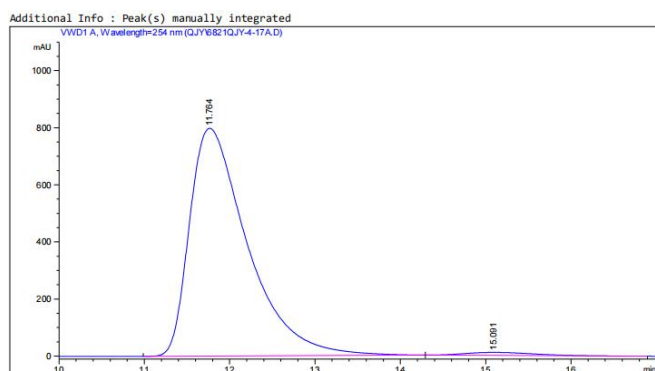

| Peak # | RetTime [min] | Type | Width [min] | Area [mAU*s] | Height [mAU] | Area %  |
|--------|---------------|------|-------------|--------------|--------------|---------|
| 1      | 11.764        | BB   | 0.7118      | 3.75904e4    | 797.64685    | 98.3911 |
| 2      | 15.091        | BBA  | 0.8711      | 614.67249    | 10.83122     | 1.6089  |

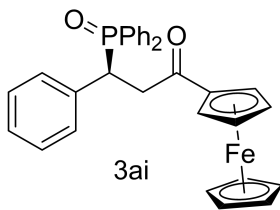

[Purification by flash column chromatography on silica gel (eluent, DCM: MeOH = 70:1). Red solid, 92% yield, 88% ee].  $^1\text{H NMR}$  (400 MHz, Chloroform-*d*)  $\delta$  8.10 – 7.94 (m, 2H), 7.56 – 7.42 (m, 7H), 7.35 – 7.29 (m, 1H), 7.28 – 7.16 (m, 4H), 7.16 – 7.09 (m, 1H), 4.72 (dt,  $J = 2.6, 1.3$  Hz, 1H), 4.66 (dt,  $J = 2.6, 1.3$  Hz, 1H), 4.48 (ddd,  $J = 10.9, 6.3, 1.7$  Hz, 1H), 4.42 (ddq,  $J = 5.1, 2.6, 1.2$  Hz, 2H), 3.74 (s, 5H), 3.71 – 3.64 (m, 1H), 3.05 (ddd,  $J = 18.1, 11.7, 1.7$  Hz, 1H).

$^{13}\text{C NMR}$  (101 MHz, Chloroform-*d*)  $\delta$  200.27 (d,  $J = 14.3$  Hz), 136.41 (d,  $J = 5.4$  Hz), 132.08 (d,  $J = 2.7$  Hz), 131.40 (d,  $J = 2.6$  Hz), 131.32, 131.24, 130.93, 130.84, 130.12 (d,  $J = 5.9$  Hz), 129.08, 128.97, 128.47 (d,  $J = 1.7$  Hz), 128.19, 128.07, 127.34 (d,  $J = 2.4$  Hz), 78.26, 72.51, 69.59, 69.47, 68.86, 40.65, 40.56, 39.95.

$^{31}\text{P NMR}$  (162 MHz,  $\text{CDCl}_3$ )  $\delta$  34.67.

HRMS (ESI<sup>+</sup>,  $m/z$ ): calcd for  $\text{C}_{31}\text{H}_{28}\text{O}_2\text{FeP}$   $[\text{M}+\text{H}]^+$  : 519.1171, found: 519.1171.

HPLC analysis: Chiracel-ODH, n-heptane/*i*-PrOH = 90:10, 1 mL/min, 22°C, detection at 254nm. Retention time (min): 11.80 (major) and 14.23 (minor)

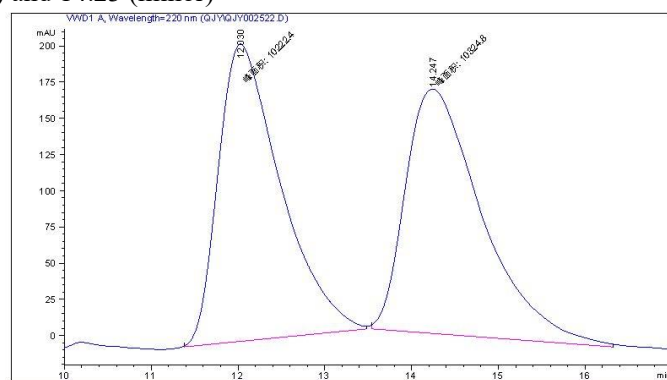

| Peak # | RetTime [min] | Type | Width [min] | Area [mAU*s] | Height [mAU] | Area %  |
|--------|---------------|------|-------------|--------------|--------------|---------|
| 1      | 12.030        | MM   | 0.8300      | 1.02224e4    | 205.27940    | 49.7509 |
| 2      | 14.247        | MM   | 1.0201      | 1.03248e4    | 168.69176    | 50.2491 |

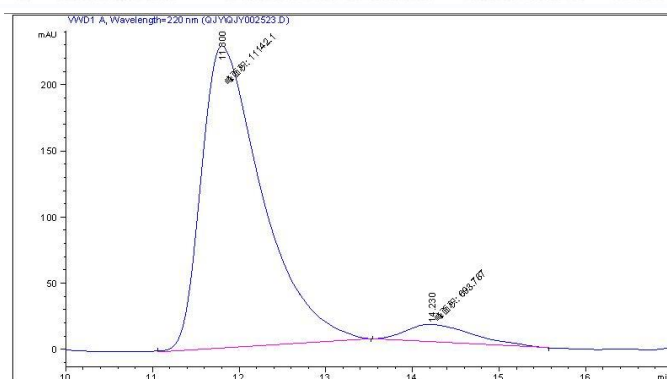

| Peak # | RetTime [min] | Type | Width [min] | Area [mAU*s] | Height [mAU] | Area %  |
|--------|---------------|------|-------------|--------------|--------------|---------|
| 1      | 11.800        | MM   | 0.8134      | 1.11421e4    | 228.29538    | 94.1383 |
| 2      | 14.230        | MM   | 0.8912      | 693.78741    | 12.97483     | 5.8617  |

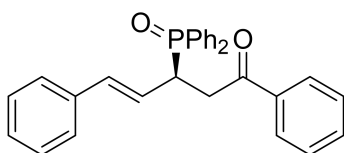

3aj

**(*S, E*)-3-(diphenylphosphoryl)-1,5-diphenylpent-4-en-1-one (3aj)**

[Purification by flash column chromatography on silica gel (eluent, DCM: MeOH = 70:1). Yellow soild, 84% yield, 99% ee]. <sup>1</sup>H NMR (400 MHz, Chloroform-*d*) δ 7.95 – 7.87 (m, 3H), 7.84 – 7.77 (m, 2H), 7.71 (dd, *J* = 13.7, 6.9 Hz, 1H), 7.55 – 7.38 (m, 9H), 7.23 – 7.11 (m, 5H), 6.41 (dd, *J* = 15.8, 4.0 Hz, 1H), 6.12 (ddd, *J* = 15.6, 9.1, 6.2 Hz, 1H), 4.17 (q, *J* = 9.3 Hz, 1H), 3.67 (ddd, *J* = 17.8, 10.2, 4.2 Hz, 1H), 3.29 (ddd, *J* = 17.6, 11.4, 2.4 Hz, 1H).

<sup>13</sup>C NMR (101 MHz, Chloroform-*d*) δ 135.53, 135.42, 134.36 (d, *J* = 11.6 Hz), 132.40, 131.59, 131.04, 130.82, 130.37, 130.28, 130.18, 130.10, 129.70 (d, *J* = 11.3 Hz), 127.95, 127.83, 127.60, 127.51, 127.39, 127.34, 127.13, 126.55, 125.27, 122.22 (d, *J* = 7.4 Hz), 37.85 (d, *J* = 71.5 Hz), 36.01.

<sup>31</sup>P NMR (162 MHz, CDCl<sub>3</sub>) δ 34.38.

HRMS (ESI<sup>+</sup>, *m/z*): calcd for C<sub>29</sub>H<sub>26</sub>O<sub>2</sub>P [M+H]<sup>+</sup> : 437.1665, found: 437.1668.

HPLC analysis: Chiracel-ADH, n-heptane/*i*-PrOH= 70:30, 1 mL/min, 22°C, detection at 228nm. Retention time (min): 24.05 (minor) and 25.80 (major).

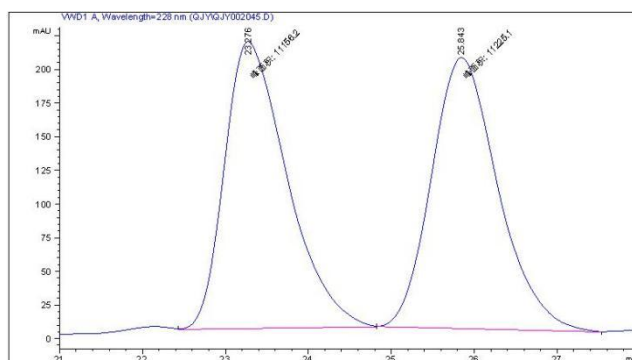

| Peak # | RetTime [min] | Type | Width [min] | Area [mAU*s] | Height [mAU] | Area %  |
|--------|---------------|------|-------------|--------------|--------------|---------|
| 1      | 23.276        | MM   | 0.8725      | 1.11562e4    | 213.10361    | 49.8460 |
| 2      | 25.843        | MM   | 0.9290      | 1.12251e4    | 201.37524    | 50.1540 |

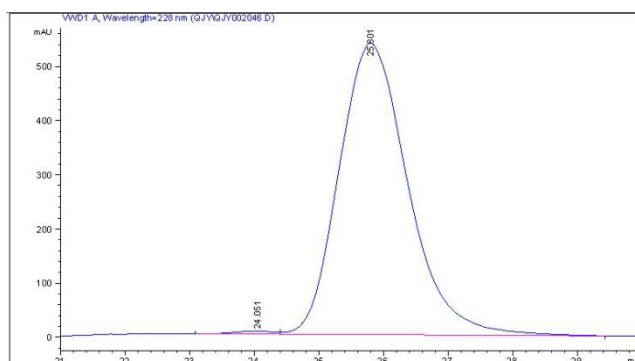

| Peak # | RetTime [min] | Type | Width [min] | Area [mAU*s] | Height [mAU] | Area %  |
|--------|---------------|------|-------------|--------------|--------------|---------|
| 1      | 24.051        | BV   | 0.5651      | 212.00438    | 5.00553      | 0.5302  |
| 2      | 25.801        | VB   | 1.1518      | 3.97706e4    | 538.42078    | 99.4698 |

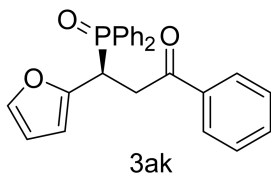

**(S)-3-(diphenylphosphoryl)-3-(furan-2-yl)-1-phenylpropan-1-one (3ak)<sup>[2]</sup>**

[Purification by flash column chromatography on silica gel (eluent, DCM: MeOH = 70:1). White solid, 93% yield, 98% ee]. <sup>1</sup>H NMR (400 MHz, Chloroform-*d*) δ 7.93 – 7.86 (m, 4H), 7.62 – 7.44 (m, 7H), 7.44 – 7.35 (m, 4H), 7.17 (d, *J* = 2.1 Hz, 1H), 6.19 – 6.15 (m, 1H), 6.06 (t, *J* = 3.3 Hz, 1H), 4.73 (td, *J* = 10.4, 2.7 Hz, 1H), 3.95 (ddd, *J* = 18.0, 10.7, 4.5 Hz, 1H), 3.42 (ddd, *J* = 18.0, 10.0, 2.7 Hz, 1H).

<sup>13</sup>C NMR (101 MHz, Chloroform-*d*) δ 196.40 (d, *J* = 12.5 Hz), 148.96 (d, *J* = 6.7 Hz), 141.87 (d, *J* = 2.9 Hz), 136.18, 133.48, 132.63 (d, *J* = 2.9 Hz), 132.22 (d, *J* = 2.8 Hz), 131.90 (d, *J* = 2.9 Hz), 131.35 (d, *J* = 3.8 Hz), 131.26 (d, *J* = 4.0 Hz), 130.73 (d, *J* = 11.5 Hz), 128.98 (d, *J* = 5.5 Hz), 128.86 (d, *J* = 4.1 Hz), 128.62, 128.35, 128.21 (d, *J* = 4.9 Hz), 110.75 (d, *J* = 2.8 Hz), 108.84 (d, *J* = 6.2 Hz), 36.43, 35.90 (d, *J* = 70.6 Hz).

<sup>31</sup>P NMR (162 MHz, Chloroform-*d*) δ 32.80.

HRMS (ESI<sup>+</sup>, *m/z*): calcd for C<sub>25</sub>H<sub>22</sub>O<sub>3</sub>P [M+H]<sup>+</sup> : 401.1301, found 401.1299.

HPLC analysis: Chiracel-ODH, n-heptane/*i*-PrOH = 90:10, 1 mL/min, 22°C, detection at 254nm. Retention time (min): 10.82(major) and 15.01 (minor)

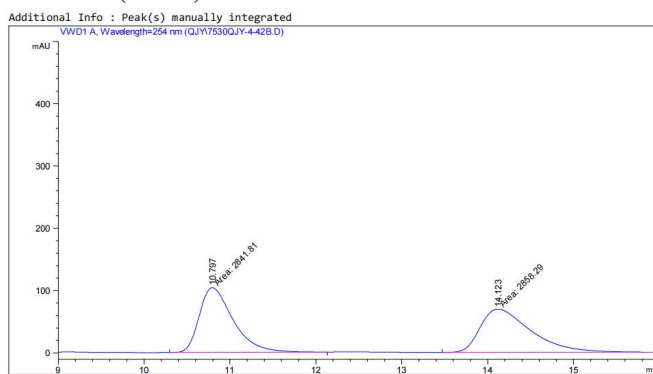

| Peak # | RetTime [min] | Type | Width [min] | Area [mAU*s] | Height [mAU] | Area %  |
|--------|---------------|------|-------------|--------------|--------------|---------|
| 1      | 10.797        | MM   | 0.4560      | 2841.81323   | 103.86420    | 49.8555 |
| 2      | 14.123        | MM   | 0.6850      | 2858.28906   | 69.54278     | 50.1445 |

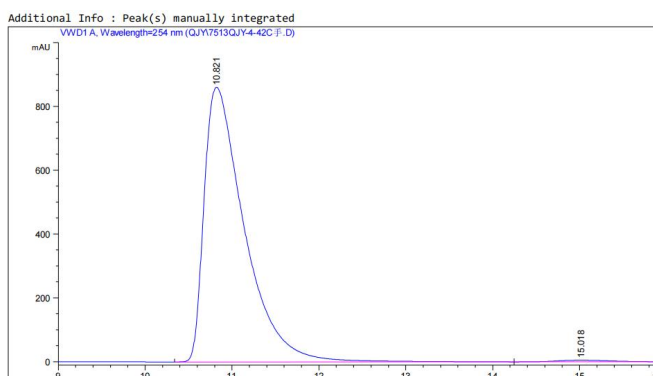

| Peak # | RetTime [min] | Type | Width [min] | Area [mAU*s] | Height [mAU] | Area %  |
|--------|---------------|------|-------------|--------------|--------------|---------|
| 1      | 10.821        | BB   | 0.4802      | 2.76686e4    | 860.33020    | 99.0533 |
| 2      | 15.018        | BB   | 0.7109      | 264.45032    | 5.49071      | 0.9467  |



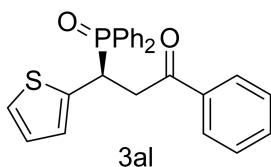

**(S)-3-(diphenylphosphoryl)-1-phenyl-3-(thiophen-2-yl)propan-1-one (3aI)<sup>[2]</sup>**

[Purification by flash column chromatography on silica gel (eluent, DCM: MeOH = 70:1). White solid, 93% yield, 98% ee] <sup>1</sup>H NMR (400 MHz, Chloroform-*d*)  $\delta$  7.92 – 7.85 (m, 2H), 7.78 (d, *J* = 7.7 Hz, 2H), 7.54 – 7.48 (m, 2H), 7.46 – 7.40 (m, 4H), 7.37 – 7.26 (m, 3H), 7.28 – 7.19 (m, 2H), 6.97 – 6.91 (m, 2H), 6.71 (t, *J* = 4.2 Hz, 1H), 4.76 (ddd, *J* = 10.2, 7.8, 2.5 Hz, 1H), 3.89 (ddd, *J* = 17.7, 10.3, 4.0 Hz, 1H), 3.27 (ddd, *J* = 17.9, 10.4, 2.6 Hz, 1H).

<sup>13</sup>C NMR (101 MHz, Chloroform-*d*)  $\delta$  195.24 (d, *J* = 12.8 Hz), 136.45 (d, *J* = 6.5 Hz), 132.44, 131.56 (d, *J* = 2.9 Hz), 131.15 (d, *J* = 2.9 Hz), 130.67 (d, *J* = 2.9 Hz), 130.23, 130.14, 130.02, 129.93, 129.70, 129.58, 128.01, 127.91 (d, *J* = 3.8 Hz), 127.80, 127.53, 127.24, 127.12, 127.10, 126.34 (d, *J* = 6.4 Hz), 125.69 (d, *J* = 2.5 Hz), 123.87 (d, *J* = 2.9 Hz), 38.80 (d, *J* = 1.6 Hz), 35.42 (d, *J* = 70.9 Hz).

<sup>31</sup>P NMR (162 MHz, Chloroform-*d*)  $\delta$  33.30.

HRMS (ESI<sup>+</sup>, *m/z*): calcd for C<sub>25</sub>H<sub>22</sub>O<sub>2</sub>PS [M+H]<sup>+</sup> : 417.1073, found 417.1077.

HPLC analysis: Chiracel-ODH, n-heptane/*i*-PrOH =90:10, 1 mL/min, 22°C, detection at 254nm. Retention time (min): 10.03(major) and 15.03(minor)

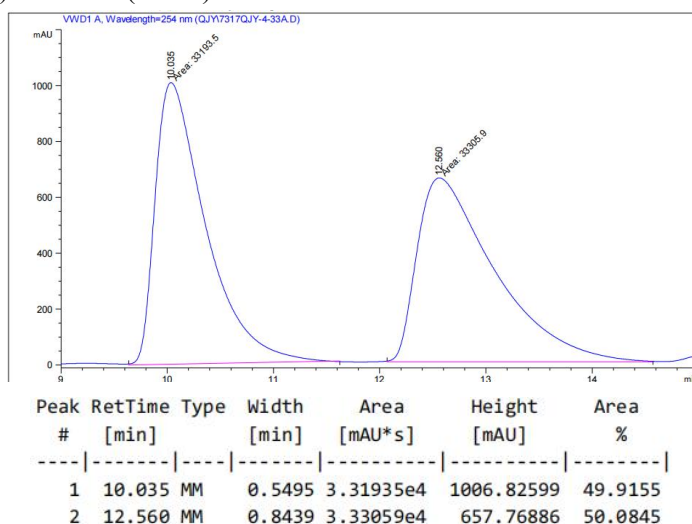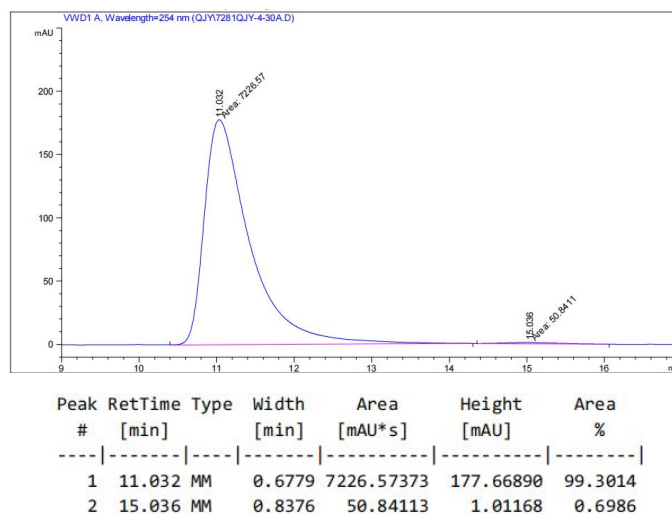

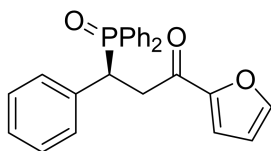

3am

**(S)-3-(diphenylphosphoryl)-1-(furan-2-yl)-3-phenylpropan-1-one (3am)**

[Purification by flash column chromatography on silica gel (eluent, DCM: MeOH = 70:1). White solid, 90% yield, 99% ee] <sup>1</sup>H NMR (400 MHz, Chloroform-*d*) δ 8.03 – 7.88 (m, 2H), 7.51 (m, 3H), 7.47 – 7.40 (m, 3H), 7.36 – 7.27 (m, 3H), 7.22 (td, *J* = 7.5, 3.1 Hz, 2H), 7.16 – 7.04 (m, 4H), 6.40 (dd, *J* = 3.6, 1.7 Hz, 1H), 4.39 (ddd, *J* = 10.2, 6.9, 2.8 Hz, 1H), 3.85 (ddd, *J* = 17.5, 10.7, 5.1 Hz, 1H), 3.17 (ddd, *J* = 17.6, 10.7, 2.8 Hz, 1H).

<sup>13</sup>C NMR (101 MHz, Chloroform-*d*) δ 185.68 (d, *J* = 14.1 Hz), 152.06 (d, *J* = 1.6 Hz), 146.85, 135.33 (d, *J* = 5.6 Hz), 132.15 (d, *J* = 2.7 Hz), 131.55 (d, *J* = 2.8 Hz), 131.35, 131.26, 130.98, 130.89, 130.78 (d, *J* = 1.5 Hz), 130.60 (d, *J* = 13.2 Hz), 129.83 (d, *J* = 5.6 Hz), 129.05, 128.93, 128.33 (d, *J* = 1.9 Hz), 128.20, 128.08, 127.19 (d, *J* = 2.5 Hz), 118.13, 112.32, 40.82 (d, *J* = 69.2 Hz), 38.49.

<sup>31</sup>P NMR (162 MHz, CDCl<sub>3</sub>) δ 34.46.

HRMS (ESI<sup>+</sup>, *m/z*): calcd for C<sub>25</sub>H<sub>22</sub>O<sub>3</sub>P[M+H]<sup>+</sup> : 401.1301, found: 401.1299.

HPLC analysis: Chiracel-ODH, n-heptane/*i*-PrOH = 90:10, 1 mL/min, 22°C, detection at 254nm. Retention time (min): 12.90 (major) and 18.25 (minor)

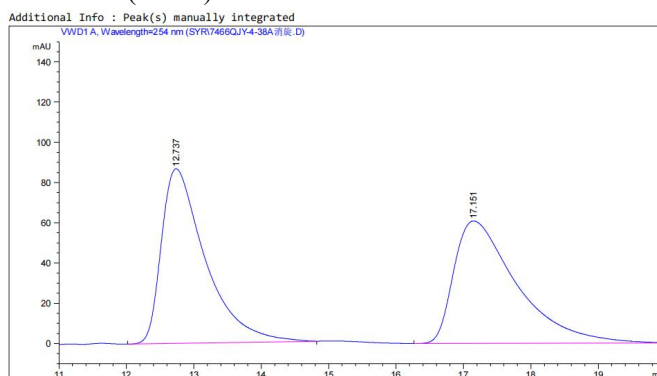

| Peak # | RetTime [min] | Type | Width [min] | Area [mAU*s] | Height [mAU] | Area %  |
|--------|---------------|------|-------------|--------------|--------------|---------|
| 1      | 12.737        | BB   | 0.6698      | 3925.57568   | 86.77723     | 49.8494 |
| 2      | 17.151        | BB   | 0.9642      | 3949.30225   | 60.85100     | 50.1506 |

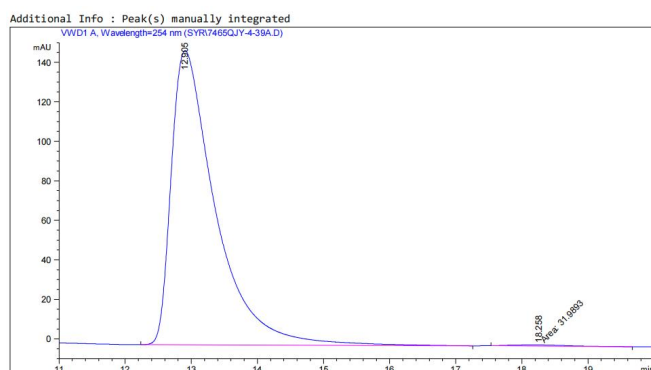

| Peak # | RetTime [min] | Type | Width [min] | Area [mAU*s] | Height [mAU] | Area %  |
|--------|---------------|------|-------------|--------------|--------------|---------|
| 1      | 12.905        | BB   | 0.6859      | 6915.37988   | 148.87871    | 99.5395 |
| 2      | 18.258        | MM   | 0.9252      | 31.98934     | 5.76284e-1   | 0.4605  |

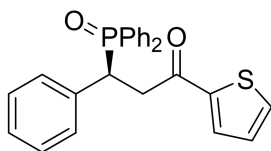

3an

**(S)-3-(diphenylphosphoryl)-3-phenyl-1-(thiophen-2-yl)propan-1-one (3an)**

[Purification by flash column chromatography on silica gel (eluent, DCM: MeOH = 70:1). White solid, 89% yield, 96% ee] <sup>1</sup>H NMR (400 MHz, Chloroform-*d*) δ 7.99 (m, 2H), 7.64 (d, *J* = 3.8 Hz, 1H), 7.57 – 7.49 (m, 4H), 7.47 – 7.41 (m, 2H), 7.40 – 7.30 (m, 3H), 7.23 (td, *J* = 7.7, 2.9 Hz, 2H), 7.17 – 7.06 (m, 3H), 7.06 – 6.99 (m, 1H), 4.42 (ddd, *J* = 9.9, 6.8, 2.6 Hz, 1H), 3.93 (ddd, *J* = 17.6, 10.6, 4.5 Hz, 1H), 3.31 (ddd, *J* = 17.6, 10.8, 2.6 Hz, 1H).

<sup>13</sup>C NMR (101 MHz, Chloroform-*d*) δ 189.73 (d, *J* = 13.9 Hz), 143.58 (d, *J* = 1.6 Hz), 135.28 (d, *J* = 5.6 Hz), 134.34, 132.73, 132.23 (d, *J* = 2.7 Hz), 131.61 (d, *J* = 3.0 Hz), 131.30, 131.21, 130.94, 130.85, 130.72 (d, *J* = 11.5 Hz), 129.78 (d, *J* = 5.6 Hz), 129.09 (d, *J* = 6.2 Hz), 128.97 (d, *J* = 7.7 Hz), 128.36 (d, *J* = 1.9 Hz), 128.23, 128.11, 127.23 (d, *J* = 2.5 Hz), 49.58 (dt, *J* = 42.9, 21.4 Hz), 41.19 (d, *J* = 69.1 Hz), 39.22.

<sup>31</sup>P NMR (162 MHz, CDCl<sub>3</sub>) δ 34.25.

HRMS (ESI<sup>+</sup>, *m/z*): calcd for C<sub>25</sub>H<sub>22</sub>O<sub>2</sub>PS [M+H]<sup>+</sup> : 417.1073, found: 417.1068.

HPLC analysis: Chiracel-ODH, n-heptane/*i*-PrOH = 90:10, 1 mL/min, 22°C, detection at 254nm. Retention time (min): 9.54(major) and 12.61 (minor)

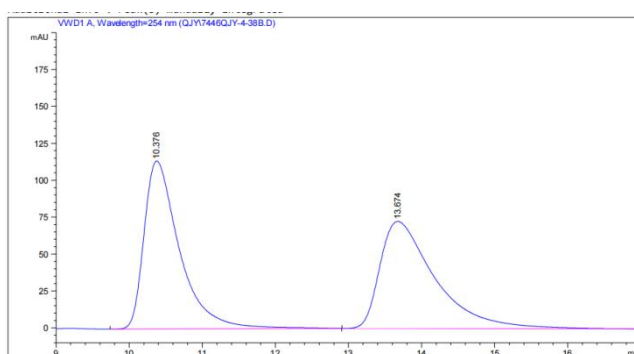

| Peak # | RetTime [min] | Type | Width [min] | Area [mAU*s] | Height [mAU] | Area %  |
|--------|---------------|------|-------------|--------------|--------------|---------|
| 1      | 10.376        | BB   | 0.5048      | 3840.66528   | 113.76929    | 50.1667 |
| 2      | 13.674        | BB   | 0.7797      | 3815.14063   | 72.53152     | 49.8333 |

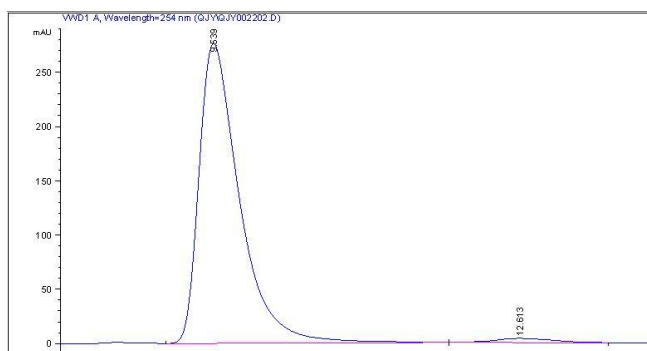

| Peak # | RetTime [min] | Type | Width [min] | Area [mAU*s] | Height [mAU] | Area %  |
|--------|---------------|------|-------------|--------------|--------------|---------|
| 1      | 9.539         | BB   | 0.4236      | 7788.19971   | 276.48401    | 98.0783 |
| 2      | 12.613        | BB   | 0.5545      | 152.59601    | 3.88254      | 1.9217  |

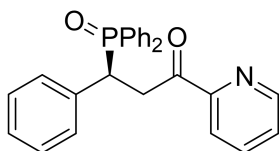

3ao

**(S)-3-(diphenylphosphoryl)-3-phenyl-1-(pyridin-2-yl)propan-1-one (3ao)<sup>[2]</sup>**

[Purification by flash column chromatography on silica gel (eluent, DCM: MeOH = 70:1), White solid, 94% yield, 99% ee]<sup>1</sup>H NMR (400 MHz, Chloroform-*d*)  $\delta$  8.06 – 7.86 (m, 2H), 7.74 (d, *J* = 8.8 Hz, 2H), 7.59 – 7.48 (m, 3H), 7.45 – 7.33 (m, 3H), 7.33 – 7.21 (m, 4H), 7.18 – 7.05 (m, 3H), 6.83 (d, *J* = 8.8 Hz, 2H), 4.50 (ddd, *J* = 10.4, 6.6, 2.5 Hz, 1H), 3.98 (ddd, *J* = 17.8, 10.4, 4.7 Hz, 1H), 3.26 (ddd, *J* = 17.8, 11.2, 2.5 Hz, 1H).

<sup>13</sup>C NMR (101 MHz, Chloroform-*d*)  $\delta$  195.20 (d, *J* = 13.4 Hz), 135.80 (d, *J* = 5.6 Hz), 132.79, 132.13 (d, *J* = 2.8 Hz), 131.96, 131.73, 131.51 (d, *J* = 2.8 Hz), 131.34, 131.26, 130.98 (d, *J* = 4.6 Hz), 130.91, 130.87, 130.78, 129.80 (d, *J* = 5.7 Hz), 129.06, 128.95, 128.37 (d, *J* = 1.9 Hz), 128.18, 128.07, 127.16 (d, *J* = 2.5 Hz), 115.81, 115.59, 41.09 (d, *J* = 69.0 Hz), 38.86.

<sup>31</sup>P NMR (162 MHz, CDCl<sub>3</sub>)  $\delta$  33.70.

HRMS (ESI<sup>+</sup>, *m/z*): calcd for C<sub>26</sub>H<sub>23</sub>NO<sub>2</sub>P [M+H]<sup>+</sup> : 412.1461, found: 412.1469.

HPLC analysis: Chiracel-ODH, n-heptane/*i*-PrOH =90:10, 1 mL/min, 22°C, detection at 254nm. Retention time (min): 8.62 (major) and 10.40 (minor)

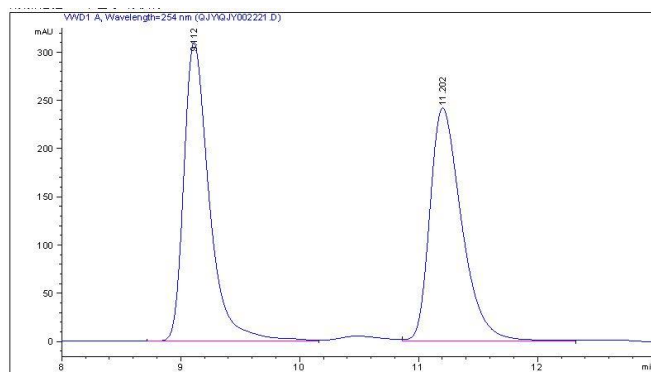

| Peak # | RetTime [min] | Type | Width [min] | Area [mAU*s] | Height [mAU] | Area %  |
|--------|---------------|------|-------------|--------------|--------------|---------|
| 1      | 9.112         | BV   | 0.2249      | 4615.63574   | 309.64758    | 50.9032 |
| 2      | 11.202        | VB   | 0.2821      | 4451.83301   | 241.49976    | 49.0968 |

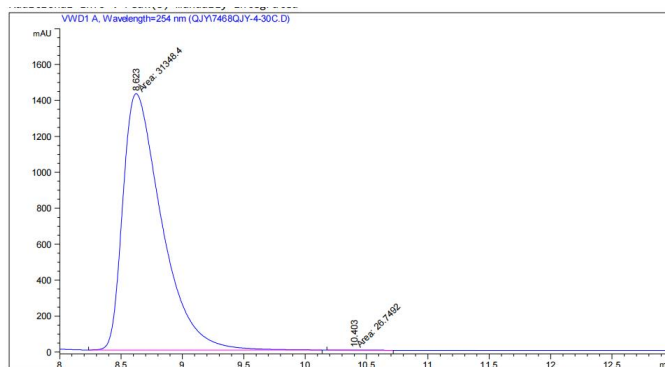

| Peak # | RetTime [min] | Type | Width [min] | Area [mAU*s] | Height [mAU] | Area %  |
|--------|---------------|------|-------------|--------------|--------------|---------|
| 1      | 8.623         | MM   | 0.3664      | 3.13484e4    | 1425.93701   | 99.9147 |
| 2      | 10.403        | MM   | 0.3043      | 26.74918     | 1.46518      | 0.0853  |

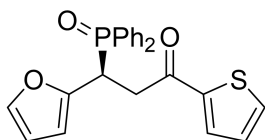

3ap

**(S)-3-(diphenylphosphoryl)-3-(furan-2-yl)-1-(thiophen-2-yl)propan-1-one (3ap)**

[Purification by flash column chromatography on silica gel (eluent, DCM: MeOH = 70:1). White solid, 90% yield, 98% ee]<sup>1</sup>H NMR (400 MHz, Chloroform-*d*)  $\delta$  7.95 – 7.86 (m, 2H), 7.71 (dd,  $J$  = 3.8, 1.2 Hz, 1H), 7.62 – 7.44 (m, 7H), 7.41 – 7.34 (m, 2H), 7.18 (m, 1H), 7.09 (dd,  $J$  = 5.0, 3.8 Hz, 1H), 6.20 – 6.14 (m, 1H), 6.09 (t,  $J$  = 3.2 Hz, 1H), 4.73 – 4.63 (m, 1H), 3.87 (ddd,  $J$  = 17.5, 10.8, 4.7 Hz, 1H), 3.33 (ddd,  $J$  = 17.5, 9.8, 2.8 Hz, 1H).

<sup>13</sup>C NMR (101 MHz, Chloroform-*d*)  $\delta$  189.32 (d,  $J$  = 13.0 Hz), 141.97 (d,  $J$  = 2.9 Hz), 134.32, 132.62 (d,  $J$  = 3.5 Hz), 132.25 (d,  $J$  = 2.7 Hz), 131.91 (d,  $J$  = 2.8 Hz), 131.35, 131.25 (d,  $J$  = 1.7 Hz), 131.15, 130.75, 130.64, 128.98 (d,  $J$  = 2.4 Hz), 128.86, 128.29 (d,  $J$  = 11.7 Hz), 110.73 (d,  $J$  = 2.6 Hz), 108.98 (d,  $J$  = 5.9 Hz), 36.96, 36.00 (d,  $J$  = 70.3 Hz).

<sup>31</sup>P NMR (162 MHz, Chloroform-*d*)  $\delta$  32.46.

HRMS (ESI<sup>+</sup>,  $m/z$ ): calcd for C<sub>23</sub>H<sub>20</sub>O<sub>3</sub>PS [M+H]<sup>+</sup>: 407.0865, found: 407.0868.

HPLC analysis: Chiracel-ODH, n-heptane/*i*-PrOH = 90:10, 1 mL/min, 22°C, detection at 254nm. Retention time (min): 14.68 (major) and 19.07(minor)

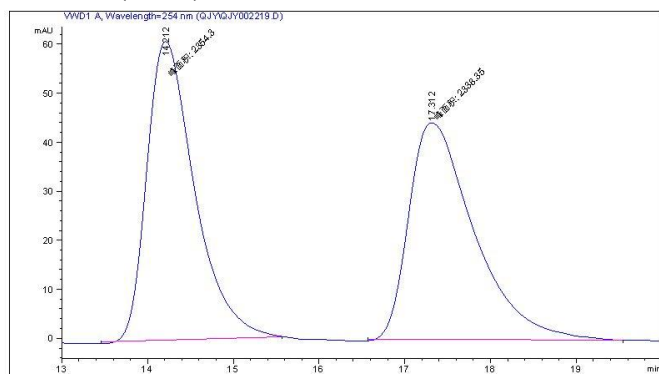

| Peak # | RetTime [min] | Type | Width [min] | Area [mAU*s] | Height [mAU] | Area %  |
|--------|---------------|------|-------------|--------------|--------------|---------|
| 1      | 14.212        | MM   | 0.6444      | 2354.29712   | 60.88744     | 50.1699 |
| 2      | 17.312        | MM   | 0.8822      | 2338.34839   | 44.17653     | 49.8301 |

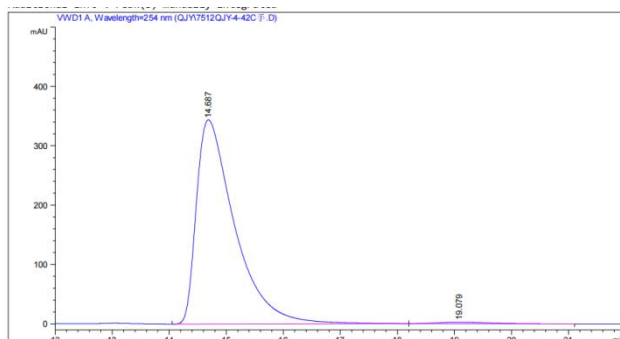

| Peak # | RetTime [min] | Type | Width [min] | Area [mAU*s] | Height [mAU] | Area %  |
|--------|---------------|------|-------------|--------------|--------------|---------|
| 1      | 14.687        | BB   | 0.6928      | 1.60280e4    | 343.89383    | 99.0574 |
| 2      | 19.079        | BB   | 0.8606      | 152.52225    | 2.38031      | 0.9426  |

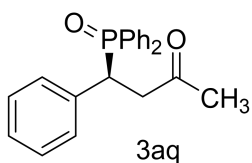

**(S)-4-(diphenylphosphoryl)-4-phenylbutan-2-one (3aq)<sup>[2]</sup>**

[Purification by flash column chromatography on silica gel (eluent, DCM: MeOH = 7:1). White solid, 84% yield, 93% ee] <sup>1</sup>H NMR (400 MHz, Chloroform-*d*) δ 7.98 – 7.89 (m, 2H), 7.54 (m, 3H), 7.43 (dd, *J* = 11.3, 7.7 Hz, 2H), 7.38 – 7.19 (m, 5H), 7.16 (m, 3H), 4.22 (ddd, *J* = 10.1, 7.0, 2.8 Hz, 1H), 3.34 (ddd, *J* = 18.0, 10.2, 5.3 Hz, 1H), 2.94 (ddd, *J* = 18.1, 11.1, 2.9 Hz, 1H), 1.96 (s, 3H).

<sup>13</sup>C NMR (101 MHz, Chloroform-*d*) δ 205.40 (d, *J* = 12.8 Hz), 135.66 (d, *J* = 5.6 Hz), 132.06 (d, *J* = 2.7 Hz), 131.67 (d, *J* = 11.1 Hz), 131.46 (d, *J* = 2.8 Hz), 131.29, 131.21, 130.94, 130.86, 130.74 (d, *J* = 1.6 Hz), 129.67 (d, *J* = 5.7 Hz), 128.95, 128.84, 128.32 (d, *J* = 2.0 Hz), 128.12, 128.00, 127.12 (d, *J* = 2.5 Hz), 43.43, 40.97 (d, *J* = 68.7 Hz), 30.62.

<sup>31</sup>P NMR (162 MHz, Chloroform-*d*) δ 33.84.

HRMS (ESI<sup>+</sup>, *m/z*): calcd for C<sub>22</sub>H<sub>22</sub>O<sub>2</sub>P [M+H]<sup>+</sup>: 349.1352, found: 349.1352.

HPLC analysis: Chiralcel-ADH, n-heptane/*i*-PrOH = 70:30, 0.5 mL/min, 22°C, detection at 228nm. Retention time (min): 18.25 (minor) and 27.85 (major)

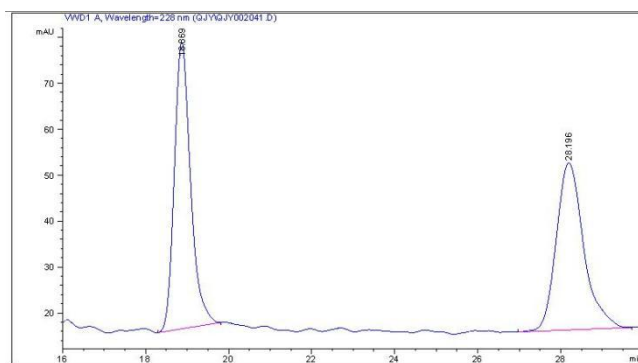

| Peak # | RetTime [min] | Type | Width [min] | Area [mAU*s] | Height [mAU] | Area %  |
|--------|---------------|------|-------------|--------------|--------------|---------|
| 1      | 18.869        | BB   | 0.4157      | 1703.32458   | 62.35729     | 50.5669 |
| 2      | 28.196        | BB   | 0.6921      | 1665.13440   | 36.36980     | 49.4331 |

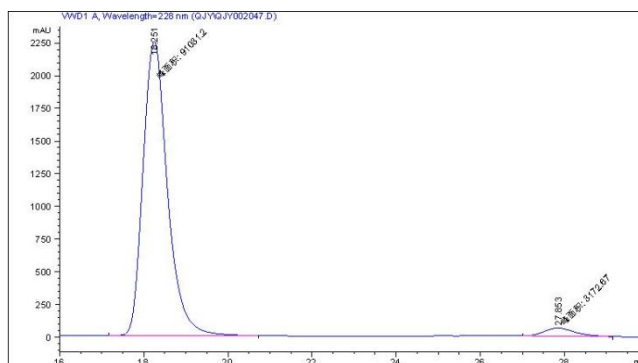

| Peak # | RetTime [min] | Type | Width [min] | Area [mAU*s] | Height [mAU] | Area %  |
|--------|---------------|------|-------------|--------------|--------------|---------|
| 1      | 18.251        | MM   | 0.6733      | 9.10312e4    | 2253.44946   | 96.6321 |
| 2      | 27.853        | MM   | 0.8425      | 3172.66870   | 62.76096     | 3.3679  |

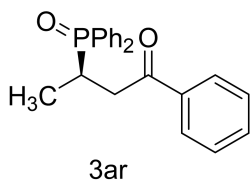

**(S)-3-(diphenylphosphoryl)-1-phenylbutan-1-one (3ar)**

[Purification by flash column chromatography on silica gel (eluent, DCM: MeOH = 70:1). colorless oi, 78% yield, 85% ee]  $^1\text{H NMR}$  (400 MHz, Chloroform-*d*)  $\delta$  7.95 – 7.88 (m, 2H), 7.86 (m, 4H), 7.57 – 7.47 (m, 4H), 7.51 – 7.39 (m, 5H), 3.45 – 3.27 (m, 2H), 3.16 – 3.03 (m, 1H), 1.21 (dd,  $J = 16.5, 6.6$  Hz, 3H).

$^{13}\text{C NMR}$  (101 MHz, Chloroform-*d*)  $\delta$  197.58 (d,  $J = 14.1$  Hz), 136.50, 133.46, 132.03 (d,  $J = 6.8$  Hz), 131.88 (d,  $J = 2.6$  Hz), 131.78 (d,  $J = 2.7$  Hz), 131.01, 130.92, 130.82, 128.93, 128.80 (d,  $J = 3.5$  Hz), 128.67, 128.63, 128.12, 38.02, 27.53 (d,  $J = 74.1$  Hz), 13.03 (d,  $J = 2.8$  Hz).

$^{31}\text{P NMR}$  (162 MHz, Chloroform-*d*)  $\delta$  37.46.

HRMS (ESI<sup>+</sup>, *m/z*): calcd for C<sub>22</sub>H<sub>22</sub>O<sub>2</sub>P [M+H]<sup>+</sup> : 349.1352, found: 349.1352.

HPLC analysis: Chiracel-ASH, n-heptane/*i*-PrOH =90:10, 1 mL/min, 22°C, detection at 254nm. Retention time (min): 13.76 (major) and 24.74 (minor)

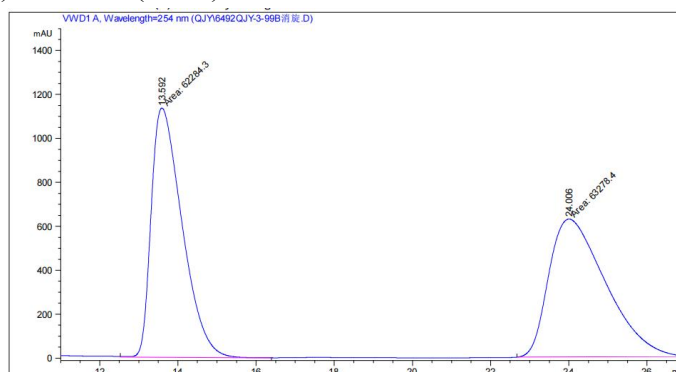

| Peak # | RetTime [min] | Type | Width [min] | Area [mAU*s] | Height [mAU] | Area %  |
|--------|---------------|------|-------------|--------------|--------------|---------|
| 1      | 13.592        | MM   | 0.9153      | 6.22843e4    | 1134.12805   | 49.6041 |
| 2      | 24.006        | MM   | 1.6815      | 6.32784e4    | 627.21631    | 50.3959 |

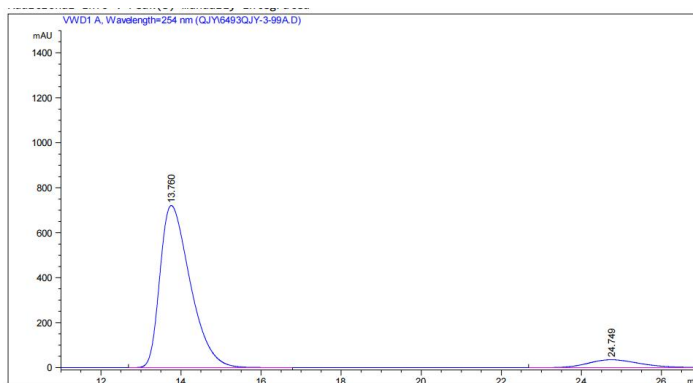

| Peak # | RetTime [min] | Type | Width [min] | Area [mAU*s] | Height [mAU] | Area %  |
|--------|---------------|------|-------------|--------------|--------------|---------|
| 1      | 13.760        | BB   | 0.8070      | 3.77680e4    | 721.18488    | 92.2721 |
| 2      | 24.749        | BB   | 1.3766      | 3163.10474   | 35.02539     | 7.7279  |

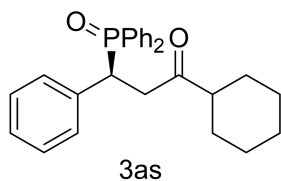

**(S)-1-cyclohexyl-3-(diphenylphosphoryl)-3-phenylpropan-1-one (3as)<sup>[3]</sup>**

[Purification by flash column chromatography on silica gel (eluent, DCM: MeOH = 70:1). White solid 91% yield, 92% ee] <sup>1</sup>H NMR (400 MHz, Chloroform-*d*) δ 8.03 – 7.87 (m, 2H), 7.56 – 7.49 (m, 3H), 7.47 – 7.40 (m, 2H), 7.33 – 7.26 (m, 3H), 7.22 (td, *J* = 7.7, 2.6 Hz, 2H), 7.20 – 7.09 (m, 3H), 4.26 (ddd, *J* = 10.0, 6.7, 2.9 Hz, 1H), 3.37 (ddd, *J* = 17.9, 10.0, 5.2 Hz, 1H), 2.89 (ddd, *J* = 17.9, 11.3, 3.0 Hz, 1H), 2.10 (ddd, *J* = 11.1, 7.7, 3.4 Hz, 1H), 1.70 – 1.47 (m, 5H), 1.17 – 0.92 (m, 5H).

<sup>13</sup>C NMR (101 MHz, Chloroform-*d*) δ 210.68 (d, *J* = 12.0 Hz), 136.03 (d, *J* = 5.3 Hz), 132.23 – 131.79 (m), 131.40 (d, *J* = 3.2 Hz), 131.29, 131.14, 130.96, 130.88, 129.76 (d, *J* = 5.5 Hz), 128.93, 128.82, 128.28 (d, *J* = 1.6 Hz), 128.13, 128.02, 127.03 (d, *J* = 2.2 Hz), 51.11, 41.50 – 40.31 (m), 27.78 (d, *J* = 3.8 Hz), 25.66, 25.38 (d, *J* = 10.0 Hz).

<sup>31</sup>P NMR (162 MHz, CDCl<sub>3</sub>) δ 34.55.

HRMS (ESI<sup>+</sup>, *m/z*): calcd for C<sub>27</sub>H<sub>30</sub>O<sub>2</sub>P [M+H]<sup>+</sup>: 417.1978, found: 417.1975.

HPLC analysis: Chiracel-ODH, n-heptane/*i*-PrOH = 90:10, 1 mL/min, 22°C, detection at 254nm. Retention time (min): 7.81 (major) and 9.07 (minor).

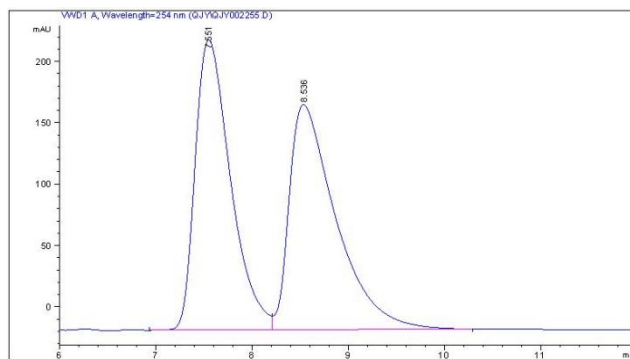

| Peak # | RetTime [min] | Type | Width [min] | Area [mAU*s] | Height [mAU] | Area %  |
|--------|---------------|------|-------------|--------------|--------------|---------|
| 1      | 7.551         | BV   | 0.3937      | 6031.98975   | 236.41457    | 49.3736 |
| 2      | 8.536         | VB   | 0.5006      | 6185.04639   | 183.34062    | 50.6264 |

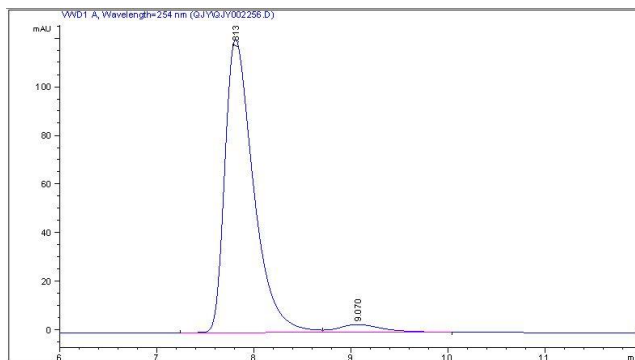

| Peak # | RetTime [min] | Type | Width [min] | Area [mAU*s] | Height [mAU] | Area %  |
|--------|---------------|------|-------------|--------------|--------------|---------|
| 1      | 7.813         | BV   | 0.3108      | 2466.03271   | 120.47008    | 95.9194 |
| 2      | 9.070         | VB   | 0.4622      | 104.91032    | 3.30607      | 4.0806  |



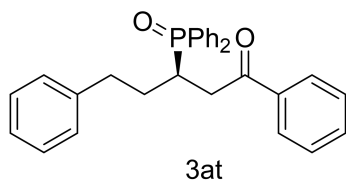

**(S)-3-(diphenylphosphoryl)-1,5-diphenylpentan-1-one (3at)**

[Purification by flash column chromatography on silica gel(eluent, DCM: MeOH = 70:1). colorless oil, 87% yield, 99% ee]<sup>1</sup>H NMR (400 MHz, Chloroform-*d*)  $\delta$  7.87 (d,  $J$  = 7.3 Hz, 2H), 7.85 – 7.73 (m, 4H), 7.57 – 7.33 (m, 9H), 7.26 – 7.06 (m, 3H), 6.98 (d,  $J$  = 6.9 Hz, 2H), 3.54 – 3.44 (m, 1H), 3.43 – 3.22 (m, 2H), 2.67 (ddd,  $J$  = 14.9, 10.2, 5.1 Hz, 1H), 2.44 (ddd,  $J$  = 13.7, 10.1, 6.7 Hz, 1H), 2.12 – 1.85 (m, 2H).

<sup>13</sup>C NMR (101 MHz, Chloroform-*d*)  $\delta$  197.55 (d,  $J$  = 10.5 Hz), 141.16, 136.29, 133.47, 132.46 (d,  $J$  = 3.2 Hz), 131.77 (d,  $J$  = 2.8 Hz), 131.51 (d,  $J$  = 2.3 Hz), 130.99 (d,  $J$  = 1.9 Hz), 130.91 (d,  $J$  = 1.9 Hz), 128.82 (d,  $J$  = 2.7 Hz), 128.70 (d,  $J$  = 2.6 Hz), 128.65, 128.46, 128.35, 128.11, 126.00, 37.02, 33.86 (d,  $J$  = 10.3 Hz), 31.79, 31.07, 30.64 (d,  $J$  = 1.5 Hz).

<sup>31</sup>P NMR (162 MHz, CDCl<sub>3</sub>)  $\delta$  34.55.

HRMS (ESI<sup>+</sup>,  $m/z$ ): calcd for C<sub>29</sub>H<sub>28</sub>O<sub>2</sub>P [M+H]<sup>+</sup> : 439.1821, found: 439.1824.

HPLC analysis: Chiracel-ODH, n-heptane/*i*-PrOH= 90:10, 1 mL/min, 22°C, detection at 254nm. Retention time (min): 9.89(minor) and 13.30(minor).

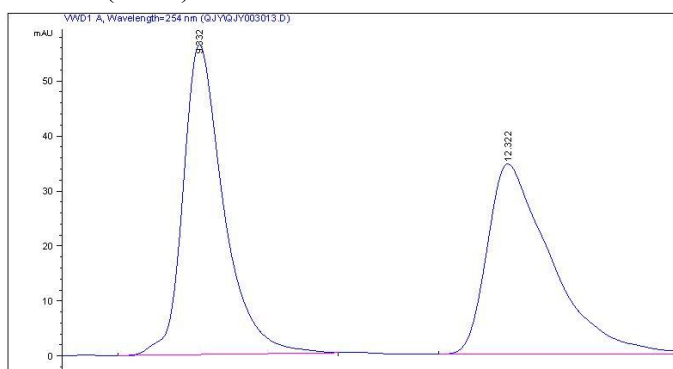

| Peak # | RetTime [min] | Type | Width [min] | Area [mAU*s] | Height [mAU] | Area %  |
|--------|---------------|------|-------------|--------------|--------------|---------|
| 1      | 9.332         | BB   | 0.4084      | 1537.26294   | 56.32273     | 50.7832 |
| 2      | 12.322        | BB   | 0.6030      | 1489.84802   | 34.55276     | 49.2168 |

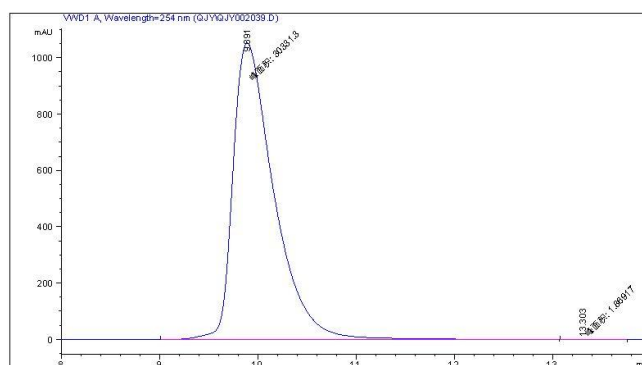

| Peak # | RetTime [min] | Type | Width [min] | Area [mAU*s] | Height [mAU] | Area %   |
|--------|---------------|------|-------------|--------------|--------------|----------|
| 1      | 9.891         | MM   | 0.4807      | 3.03313e4    | 1051.64954   | 99.9938  |
| 2      | 13.303        | MM   | 0.3407      | 1.86917      | 9.14463e-2   | 6.162e-3 |

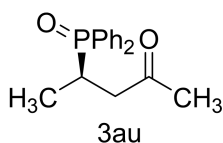

**(S)-4-(diphenylphosphoryl)pentan-2-one(3au)**

[Purification by flash column chromatography on silica gel (eluent, DCM: MeOH= 70:1). colorless oil., 72% yield, 91% ee]  $^1\text{H NMR}$  (400 MHz, Chloroform-*d*)  $\delta$  7.83 – 7.72 (m, 4H), 7.55 – 7.40 (m, 6H), 3.13 – 3.02 (m, 1H), 2.76 – 2.56 (m, 2H), 2.06 (s, 3H), 1.10 (dd,  $J = 16.4, 7.0$  Hz, 3H).

$^{13}\text{C NMR}$  (101 MHz, Chloroform-*d*)  $\delta$  206.20 (d,  $J = 13.4$  Hz), 131.86 (d,  $J = 2.9$  Hz), 131.77 (d,  $J = 2.7$  Hz), 131.00, 130.91, 130.83, 128.88, 128.76 (d,  $J = 2.2$  Hz), 128.63, 42.83, 30.60, 27.23 (d,  $J = 73.9$  Hz), 12.97 (d,  $J = 2.9$  Hz).

$^{31}\text{P NMR}$  (162 MHz,  $\text{CDCl}_3$ )  $\delta$  34.65.

HRMS (ESI<sup>+</sup>,  $m/Z$ ): calcd for  $\text{C}_{17}\text{H}_{20}\text{O}_2\text{P}$   $[\text{M}+\text{H}]^+$  : 287.1195, found: 287.1195.

HPLC analysis: Chiralcel-ADH, n-heptane/*i*-PrOH=90:10, 1 mL/min, 22°C, detection at 254nm. Retention time (min): 21.03(minor) and 23.54(major)

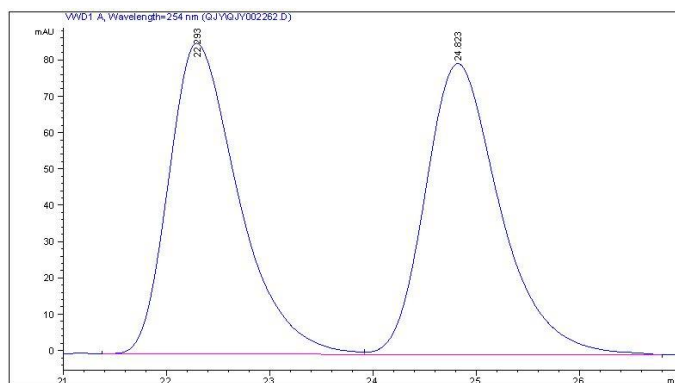

| Peak # | RetTime [min] | Type | Width [min] | Area [mAU*s] | Height [mAU] | Area %  |
|--------|---------------|------|-------------|--------------|--------------|---------|
| 1      | 22.293        | BV   | 0.7062      | 4013.60522   | 85.57813     | 49.9916 |
| 2      | 24.823        | VB   | 0.7584      | 4014.95630   | 80.01646     | 50.0084 |

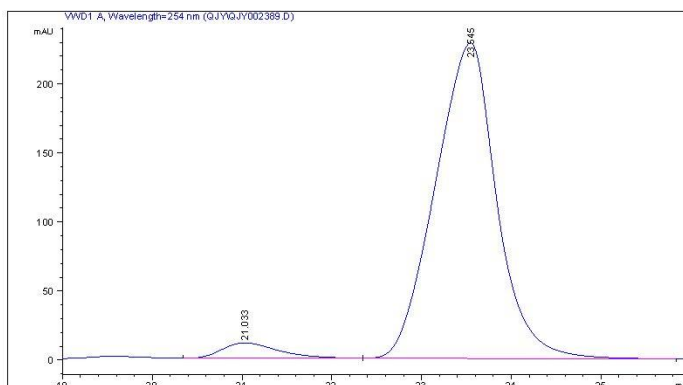

| Peak # | RetTime [min] | Type | Width [min] | Area [mAU*s] | Height [mAU] | Area %  |
|--------|---------------|------|-------------|--------------|--------------|---------|
| 1      | 21.033        | BB   | 0.6507      | 485.96890    | 11.23368     | 4.2998  |
| 2      | 23.545        | BB   | 0.7215      | 1.08161e4    | 228.38295    | 95.7002 |

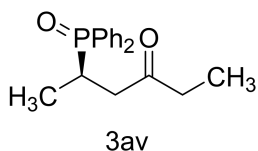

**(S)-5-(diphenylphosphoryl)hexan-3-one(3av)**

[Purification by flash column chromatography on silica gel (eluent, DCM: MeOH = 70:1). colorless oil, 85% yield, 92% ee] <sup>1</sup>H NMR (400 MHz, Chloroform-*d*) δ 7.82 – 7.71 (m, 4H), 7.50 – 7.39 (m, 6H), 3.11-3.08 (m, 1H), 2.67 – 2.54 (m, 2H), 2.29 (q, *J* = 7.3 Hz, 2H), 1.08 (dd, *J* = 16.4, 7.0 Hz, 3H), 0.93 (t, *J* = 7.3 Hz, 3H)..

<sup>13</sup>C NMR (101 MHz, Chloroform-*d*) δ 207.99 (d, *J* = 12.9 Hz), 130.79 (d, *J* = 2.8 Hz), 130.71 (d, *J* = 2.7 Hz), 129.89 (dd, *J* = 8.8, 4.7 Hz), 127.82, 127.71, 127.60, 40.48, 35.69, 26.24 (d, *J* = 73.9 Hz), 11.95 (d, *J* = 2.9 Hz), 6.62.

<sup>31</sup>P NMR (162 MHz, CDCl<sub>3</sub>) δ 34.94.

HRMS (ESI<sup>+</sup>, *m/z*): calcd for C<sub>18</sub>H<sub>22</sub>O<sub>2</sub>P [M+H]<sup>+</sup> : 301.1352, found: 301.1353.

HPLC analysis: Chiracel-ADH, n-heptane/*i*-PrOH =90:10, 1 mL/min, 22°C, detection at 254nm. Retention time (min): 19.31 (minor) and 21.95 (major)

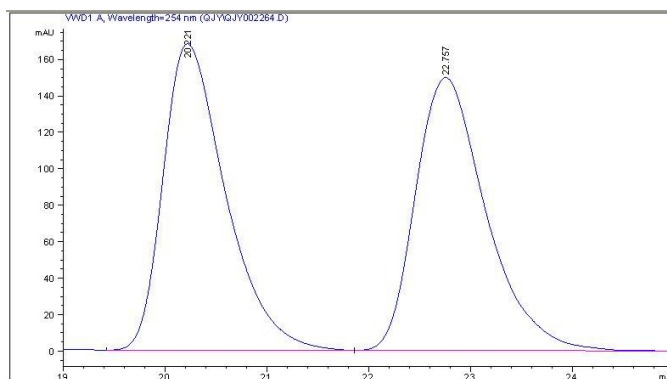

| Peak # | RetTime [min] | Type | Width [min] | Area [mAU*s] | Height [mAU] | Area %  |
|--------|---------------|------|-------------|--------------|--------------|---------|
| 1      | 20.221        | BB   | 0.6474      | 7181.36377   | 168.10245    | 49.9157 |
| 2      | 22.757        | BB   | 0.7433      | 7205.61719   | 149.77527    | 50.0843 |

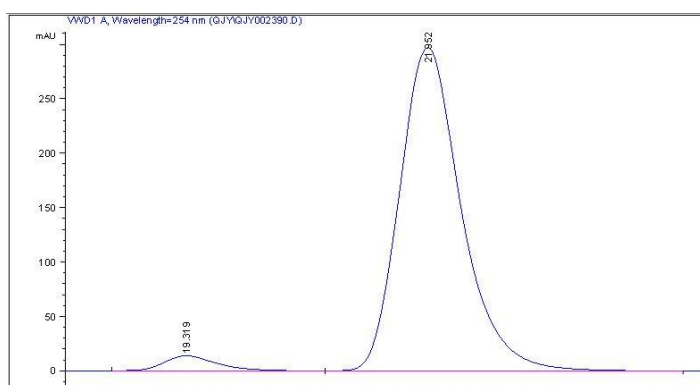

| Peak # | RetTime [min] | Type | Width [min] | Area [mAU*s] | Height [mAU] | Area %  |
|--------|---------------|------|-------------|--------------|--------------|---------|
| 1      | 19.319        | BB   | 0.5867      | 525.87927    | 13.58196     | 3.6665  |
| 2      | 21.952        | BB   | 0.7102      | 1.38171e4    | 296.76974    | 96.3335 |

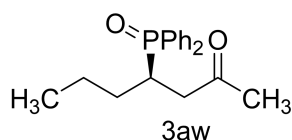

**(S)-4-(diphenylphosphoryl)heptan-2-one (3aw)**

[Purification by flash column chromatography on silica gel (eluent, DCM: MeOH= 70:1). colorless oil., 84% yield, 99% ee] <sup>1</sup>H NMR (400 MHz, Chloroform-*d*) δ 7.87 – 7.72 (m, 4H), 7.54 – 7.38 (m, 6H), 3.18 (ddd, *J* = 10.4, 7.6, 3.9 Hz, 1H), 2.76 (ddd, *J* = 19.6, 16.0, 3.8 Hz, 1H), 2.63 (ddd, *J* = 18.8, 7.5 Hz, 1H), 1.98 (s, 3H), 1.69 – 1.39 (m, 2H), 1.27 (m, 1H), 1.12 (m, 1H), 0.78 (t, *J* = 7.3 Hz, 3H).

<sup>13</sup>C NMR (101 MHz, Chloroform-*d*) δ 206.10 (d, *J* = 9.7 Hz), 132.50, 131.74 (dd, *J* = 4.7, 2.8 Hz), 131.54, 130.99, 130.91 (d, *J* = 1.9 Hz), 130.84, 128.77, 128.65 (d, *J* = 1.3 Hz), 41.74, 31.50, 30.77, 30.67 (d, *J* = 1.9 Hz), 30.08, 20.89 (d, *J* = 11.5 Hz), 13.98.

<sup>31</sup>P NMR (162 MHz, Chloroform-*d*) δ 34.53.

HRMS (ESI<sup>+</sup>, *m/z*): calcd for C<sub>19</sub>H<sub>24</sub>O<sub>2</sub>P [M+H]<sup>+</sup> : 315.1508, found: 315.1508.

HPLC analysis: Chiracel-ADH, n-heptane/*i*-PrOH= 90:10, 1 mL/min, 22°C, detection at 254nm. Retention time (min): 23.05(minor) and 24.55 (major)

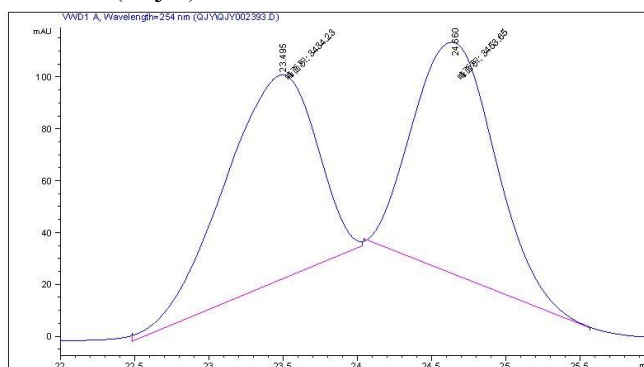

| Peak # | RetTime [min] | Type | Width [min] | Area [mAU*s] | Height [mAU] | Area %  |
|--------|---------------|------|-------------|--------------|--------------|---------|
| 1      | 23.495        | MM   | 0.7267      | 3434.22656   | 78.76094     | 49.8590 |
| 2      | 24.660        | MM   | 0.6440      | 3453.64600   | 89.37630     | 50.1410 |

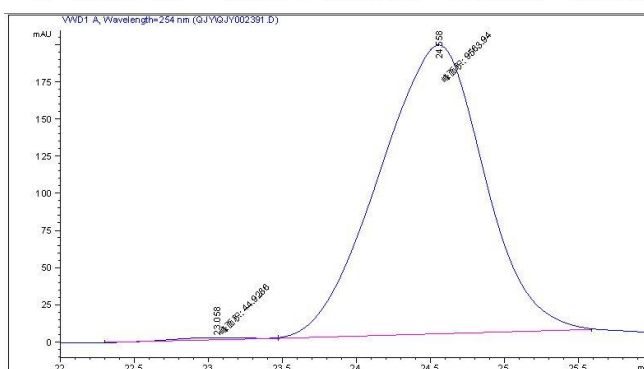

| Peak # | RetTime [min] | Type | Width [min] | Area [mAU*s] | Height [mAU] | Area %  |
|--------|---------------|------|-------------|--------------|--------------|---------|
| 1      | 23.058        | MM   | 0.5386      | 44.92859     | 1.39030      | 0.4676  |
| 2      | 24.558        | MM   | 0.8213      | 9563.94043   | 194.07855    | 99.5324 |

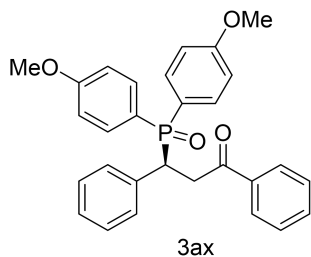

**(S)-3-(bis(4-methoxyphenyl)phosphoryl)-1,3-diphenylpropan-1-one(3ax)<sup>[2]</sup>**

[Purification by flash column chromatography on silica gel (eluent, DCM: MeOH = 70:1). White solid, 85% yield, 97% ee] <sup>1</sup>H NMR (400 MHz, Chloroform-*d*) δ 7.91 – 7.80 (m, 4H), 7.50 – 7.45 (m, 1H), 7.39 – 7.25 (m, 6H), 7.19 – 7.08 (m, 3H), 7.02 – 6.96 (m, 2H), 6.76 – 6.69 (m, 2H), 4.36 (ddd, *J* = 10.0, 7.2, 2.5 Hz, 1H), 3.97 (ddd, *J* = 18.1, 10.3, 4.4 Hz, 1H), 3.80 (s, 3H), 3.71 (s, 3H), 3.39 (ddd, *J* = 18.1, 11.2, 2.4 Hz, 1H)..

<sup>13</sup>C NMR (101 MHz, Chloroform-*d*) δ 196.89 (d, *J* = 13.3 Hz), 136.47 – 136.20 (m), 133.35, 133.16, 133.06, 132.88, 132.76 (d, *J* = 3.3 Hz), 132.62, 129.85 (d, *J* = 5.5 Hz), 128.55, 128.30 (d, *J* = 1.9 Hz), 128.12, 126.98 (d, *J* = 2.5 Hz), 114.53 (d, *J* = 2.3 Hz), 114.40 (d, *J* = 4.0 Hz), 113.66, 113.53, 55.38 (d, *J* = 5.8 Hz), 55.20, 41.53 (d, *J* = 69.7 Hz), 39.07.

<sup>31</sup>P NMR (162 MHz, Chloroform-*d*) δ 34.56.

HRMS (ESI<sup>+</sup>, *m/z*): calcd for C<sub>29</sub>H<sub>28</sub>O<sub>4</sub>P [M+H]<sup>+</sup> : 471.1647, found: 470.1643.

HPLC analysis: Chiracel-ODH, n-heptane/*i*-PrOH = 70:30, 0.6 mL/min, 22°C, detection at 254nm. Retention time (min): 10.58(major) and 13.42 (minor)

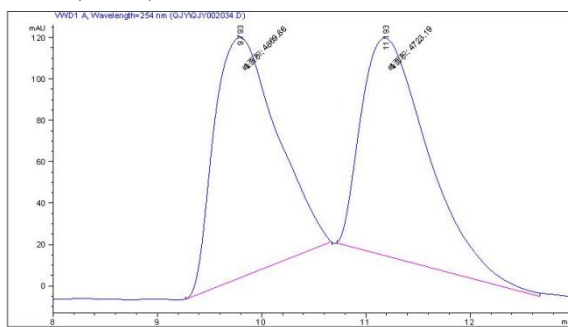

| Peak # | RetTime [min] | Type | Width [min] | Area [mAU*s] | Height [mAU] | Area %  |
|--------|---------------|------|-------------|--------------|--------------|---------|
| 1      | 9.793         | MM   | 0.6991      | 4869.85693   | 116.09930    | 50.7644 |
| 2      | 11.193        | MM   | 0.7477      | 4723.19336   | 105.28025    | 49.2356 |

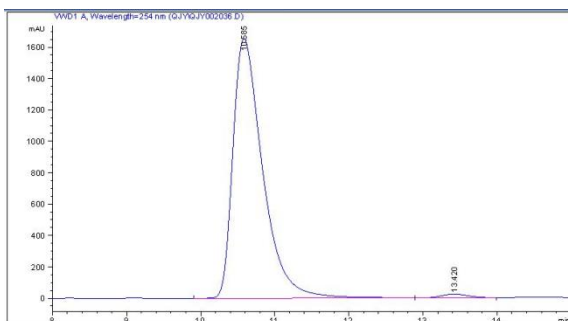

| Peak # | RetTime [min] | Type | Width [min] | Area [mAU*s] | Height [mAU] | Area %  |
|--------|---------------|------|-------------|--------------|--------------|---------|
| 1      | 10.585        | BB   | 0.4236      | 4.62206e4    | 1656.04065   | 98.5990 |
| 2      | 13.420        | BV   | 0.4068      | 656.75177    | 24.97425     | 1.4010  |

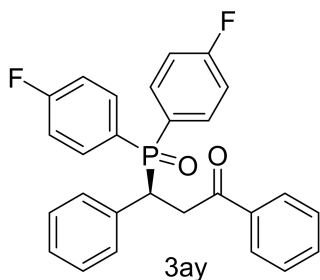

**(S)-3-(bis(4-fluorophenyl)phosphoryl)-1,3-diphenylpropan-1-one (3ay)**

[Purification by flash column chromatography on silica gel (eluent, DCM: MeOH =70:1). White solid, 82% yield, 99% ee]<sup>1</sup>H NMR (400 MHz, Chloroform-*d*)  $\delta$  7.96 (m, 2H), 7.86 – 7.82 (m, 2H), 7.53 – 7.47 (m, 1H), 7.44 – 7.33 (m, 6H), 7.24 – 7.09 (m, 5H), 6.94 (td,  $J$  = 8.8, 2.2 Hz, 2H), 4.43 (ddd,  $J$  = 9.7, 6.8, 2.6 Hz, 1H), 3.99 (ddd,  $J$  = 18.2, 10.0, 4.8 Hz, 1H), 3.38 (ddd,  $J$  = 18.2, 11.8, 2.6 Hz, 1H).

<sup>13</sup>C NMR (101 MHz, Chloroform-*d*)  $\delta$  196.44 (d,  $J$  = 12.9 Hz), 136.17, 135.61 (d,  $J$  = 5.6 Hz), 133.89, 133.80, 133.70, 133.56, 133.48, 133.39 (d,  $J$  = 1.6 Hz), 133.29, 129.78 (d,  $J$  = 5.8 Hz), 128.64, 128.51 (d,  $J$  = 2.0 Hz), 128.12, 127.34 (d,  $J$  = 2.5 Hz), 116.51 (dd,  $J$  = 21.4, 12.3 Hz), 115.60 (dd,  $J$  = 21.4, 13.0 Hz), 41.18 (d,  $J$  = 70.3 Hz), 38.89.

<sup>31</sup>P NMR (162 MHz, Chloroform-*d*)  $\delta$  34.57.

HRMS (ESI<sup>+</sup>, *m/z*): calcd for C<sub>27</sub>H<sub>22</sub>O<sub>2</sub>F<sub>2</sub>P [M+H]<sup>+</sup> :447.1320, found: 447.1316.

HPLC analysis: Chiracel-ODH, n-heptane/*i*-PrOH =90:10, 1 mL/min, 22°C, detection at 254nm. Retention time (min): 5.93 (major) and 8.59 (minor)

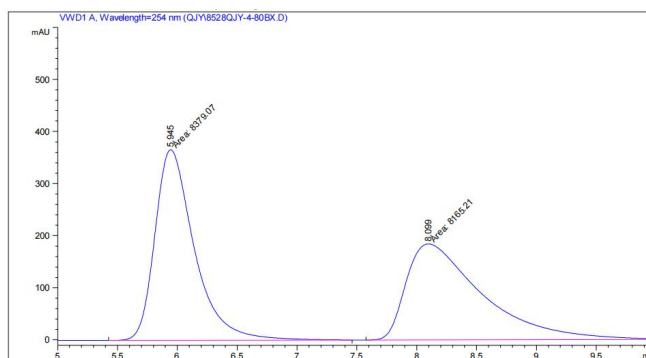

| Peak # | RetTime [min] | Type | Width [min] | Area [mAU*s] | Height [mAU] | Area %  |
|--------|---------------|------|-------------|--------------|--------------|---------|
| 1      | 5.945         | MM   | 0.3818      | 8379.07227   | 365.81290    | 50.6463 |
| 2      | 8.099         | MM   | 0.7380      | 8165.20703   | 184.38971    | 49.3537 |

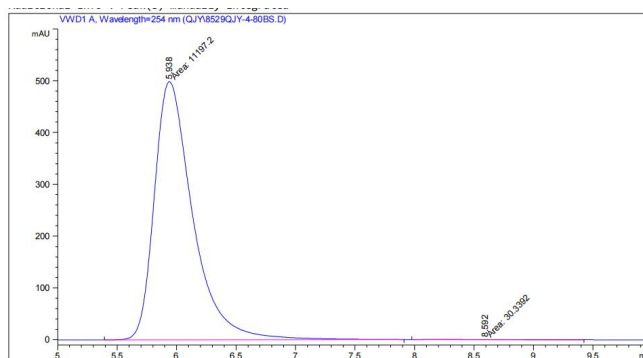

| Peak # | RetTime [min] | Type | Width [min] | Area [mAU*s] | Height [mAU] | Area %  |
|--------|---------------|------|-------------|--------------|--------------|---------|
| 1      | 5.938         | MM   | 0.3746      | 1.11972e4    | 498.23904    | 99.7298 |
| 2      | 8.592         | MM   | 0.8302      | 30.33924     | 6.09104e-1   | 0.2702  |

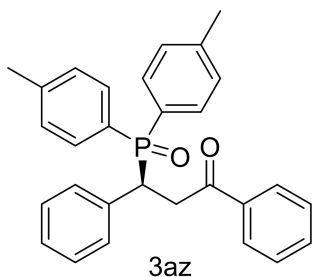

**(S)-3-(di-p-tolylphosphoryl)-1,3-diphenylpropan-1-one (3az)<sup>[2]</sup>**

[Purification by flash column chromatography on silica gel (eluent, DCM: MeOH = 70:1). White solid, 85% yield, 98% ee] <sup>1</sup>H NMR (400 MHz, Chloroform-*d*) δ 7.88 – 7.81 (m, 4H), 7.48 (t, *J* = 7.4 Hz, 1H), 7.43 – 7.26 (m, 8H), 7.18 – 7.07 (m, 3H), 7.03 (dd, *J* = 8.2, 2.8 Hz, 2H), 4.42 (ddd, *J* = 9.8, 7.0, 2.4 Hz, 1H), 4.01 (ddd, *J* = 18.1, 10.5, 4.2 Hz, 1H), 3.36 (ddd, *J* = 18.1, 11.1, 2.4 Hz, 1H), 2.36 (s, 3H), 2.25 (s, 3H).

<sup>13</sup>C NMR (101 MHz, Chloroform-*d*) δ 196.81 (d, *J* = 13.5 Hz), 142.45 (d, *J* = 2.8 Hz), 141.75 (d, *J* = 2.7 Hz), 136.38, 136.20 (d, *J* = 5.6 Hz), 133.35, 131.31, 131.22, 131.02, 130.93, 129.92, 129.86, 129.76, 129.64, 128.92, 128.79, 128.54, 128.30 (d, *J* = 2.0 Hz), 128.13, 126.99 (d, *J* = 2.4 Hz), 41.15 (d, *J* = 69.2 Hz), 39.13, 31.62, 22.70, 21.60, 21.52, 14.20.

<sup>31</sup>P NMR (162 MHz, Chloroform-*d*) δ 33.99.

HRMS (ESI<sup>+</sup>, *m/z*): calcd for C<sub>29</sub>H<sub>28</sub>O<sub>2</sub>P [M+H]<sup>+</sup>: 439.1827, found 439.1829.

HPLC analysis: Chiracel-ODH, n-heptane/*i*-PrOH = 90:10, 1 mL/min, 22°C, detection at 254nm. Retention time (min): 7.56 (major) and 14.31 (minor)

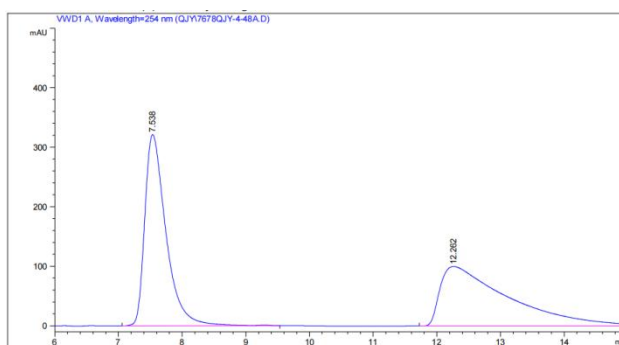

| Peak # | RetTime [min] | Type | Width [min] | Area [mAU*s] | Height [mAU] | Area %  |
|--------|---------------|------|-------------|--------------|--------------|---------|
| 1      | 7.538         | BV R | 0.3487      | 7427.11426   | 321.33218    | 49.6754 |
| 2      | 12.262        | BB   | 1.0276      | 7524.16504   | 99.90671     | 50.3246 |

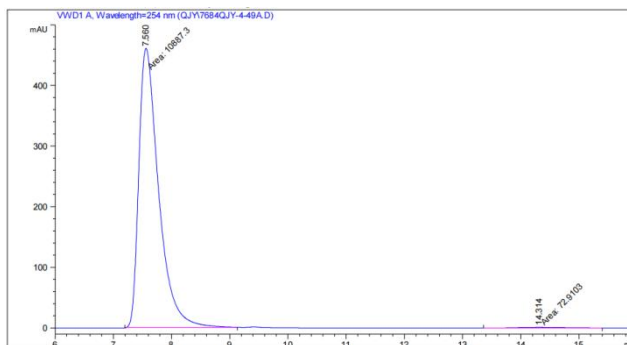

| Peak # | RetTime [min] | Type | Width [min] | Area [mAU*s] | Height [mAU] | Area %  |
|--------|---------------|------|-------------|--------------|--------------|---------|
| 1      | 7.560         | MM   | 0.3941      | 1.08873e4    | 460.41727    | 99.3348 |
| 2      | 14.314        | MM   | 1.0149      | 72.91031     | 1.19734      | 0.6652  |

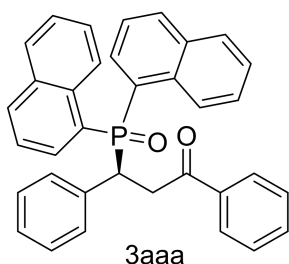

**(S)-3-(di(naphthalen-1-yl)phosphoryl)-1,3-diphenylpropan-1-one (3aaa)<sup>[3]</sup>**

[Purification by flash column chromatography on silica gel (eluent, DCM: MeOH= 70:1). White solid, 80% yield, 84% ee] <sup>1</sup>H NMR (400 MHz, Chloroform-*d*) δ 8.87 – 8.80 (m, 1H), 8.67 – 8.57 (m, 1H), 8.20 (ddd, *J* = 13.3, 7.2, 1.1 Hz, 1H), 7.97 (d, *J* = 8.1 Hz, 1H), 7.87 (m, 3H), 7.81 – 7.72 (m, 2H), 7.68 – 7.60 (m, 1H), 7.59 – 7.21 (m, 11H), 7.00 – 6.82 (m, 3H), 4.97 (ddd, *J* = 9.8, 7.0, 2.1 Hz, 1H), 4.32 (ddd, *J* = 18.5, 10.4, 3.7 Hz, 1H), 3.88 (ddd, *J* = 18.5, 10.7, 2.1 Hz, 1H).

<sup>13</sup>C NMR (101 MHz, Chloroform-*d*) δ 196.98 (d, *J* = 13.3 Hz), 136.42, 136.25 (d, *J* = 5.0 Hz), 134.27 (d, *J* = 8.6 Hz), 134.07 (d, *J* = 7.1 Hz), 133.72 (d, *J* = 3.1 Hz), 133.50, 133.39 (d, *J* = 2.8 Hz), 133.26 (d, *J* = 9.4 Hz), 132.80 (d, *J* = 2.9 Hz), 132.52 (d, *J* = 9.9 Hz), 130.84 (d, *J* = 9.6 Hz), 129.73 (d, *J* = 5.8 Hz), 128.99, 128.65, 128.57, 128.22, 128.12 (d, *J* = 2.3 Hz), 127.50, 126.99, 126.95 (d, *J* = 2.9 Hz), 126.87, 126.59, 126.10 (d, *J* = 4.3 Hz), 125.95, 124.57, 124.44, 124.25, 124.12, 41.22 (d, *J* = 70.5 Hz), 40.02.

<sup>31</sup>P NMR (162 MHz, Chloroform-*d*) δ 34.29.

HRMS (ESI<sup>+</sup>, *m/z*): calcd for C<sub>35</sub>H<sub>28</sub>O<sub>2</sub>P [M+H]<sup>+</sup> : 511.1748, found: 511.1749.

HPLC analysis: Chiracel-ODH, n-heptane/*i*-PrOH =90:10, 1 mL/min, 22°C, detection at 254nm. Retention time (min): 12.83 (major) and 24.16(minor).

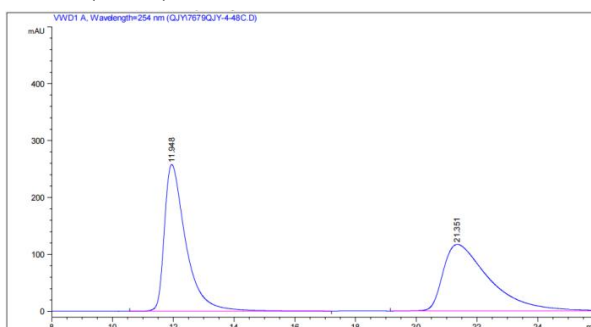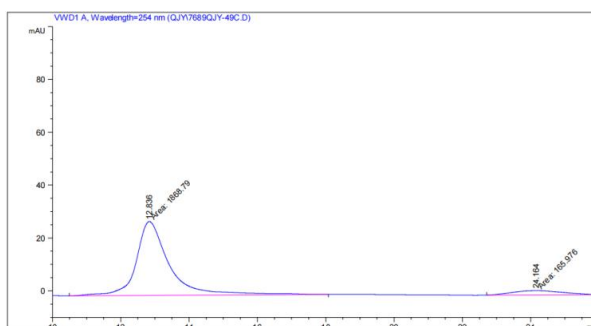



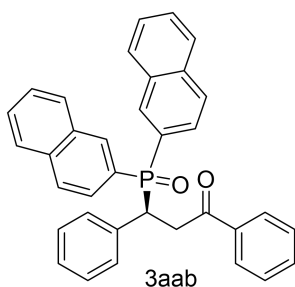

**(S)-3-(di(naphthalen-2-yl)phosphoryl)-1,3-diphenylpropan-1-one (3aab)<sup>[3]</sup>**

[Purification by flash column chromatography on silica gel (eluent, DCM: MeOH = 70:1). White solid, 96% yield, 83% ee]<sup>1</sup>**H NMR** (400 MHz, Chloroform-*d*)  $\delta$  8.73 – 8.64 (m, 1H), 8.13 (dd,  $J$  = 13.3, 1.4 Hz, 1H), 8.03 – 7.91 (m, 3H), 7.89 – 7.77 (m, 3H), 7.72 (dd,  $J$  = 8.7, 2.8 Hz, 3H), 7.62 – 7.37 (m, 8H), 7.29 (t,  $J$  = 7.8 Hz, 2H), 7.14 (dd,  $J$  = 8.3, 6.7 Hz, 2H), 7.11 – 7.03 (m, 1H), 4.75 (ddd,  $J$  = 10.4, 6.7, 2.5 Hz, 1H), 4.17 – 4.04 (m, 1H), 3.47 (ddd,  $J$  = 18.1, 11.2, 2.4 Hz, 1H).

<sup>13</sup>**C NMR** (101 MHz, Chloroform-*d*)  $\delta$  196.68 (d,  $J$  = 13.3 Hz), 136.28, 136.00 (d,  $J$  = 5.6 Hz), 134.74 (d,  $J$  = 2.3 Hz), 134.37 (d,  $J$  = 2.4 Hz), 133.78 (d,  $J$  = 7.4 Hz), 133.39, 133.36, 133.28, 132.73 (d,  $J$  = 12.3 Hz), 132.29 (d,  $J$  = 12.8 Hz), 129.96 (d,  $J$  = 5.8 Hz), 129.10, 129.01, 128.88 (d,  $J$  = 3.7 Hz), 128.54, 128.48 (d,  $J$  = 2.0 Hz), 128.38, 128.11, 128.02, 127.89 (d,  $J$  = 3.2 Hz), 127.69, 127.23 (d,  $J$  = 2.5 Hz), 127.15, 126.72, 125.79 (d,  $J$  = 3.7 Hz), 125.70 (d,  $J$  = 3.6 Hz), 40.98 (d,  $J$  = 69.3 Hz), 39.15.

<sup>31</sup>**P NMR** (162 MHz, Chloroform-*d*)  $\delta$  34.42.

HRMS (ESI<sup>+</sup>, m/Z): calcd for C<sub>35</sub>H<sub>28</sub>O<sub>2</sub>P [M+H]<sup>+</sup> : 511.1748, found: 511.1749.

HPLC analysis: Chiracel-ODH, n-heptane/*i*-PrOH = 90:10, 1 mL/min, 22°C, detection at 254nm. Retention time (min): 8.07 (major) and 8.90 (minor).

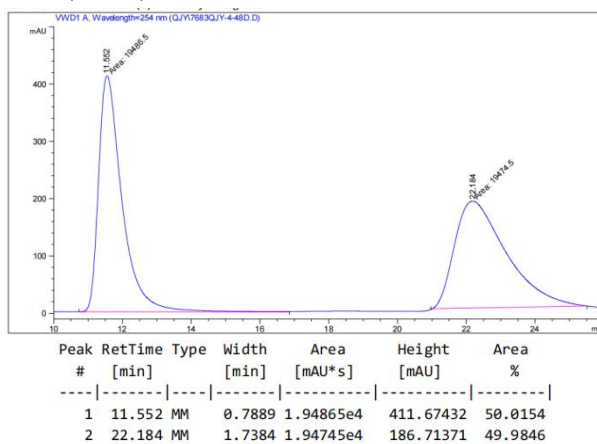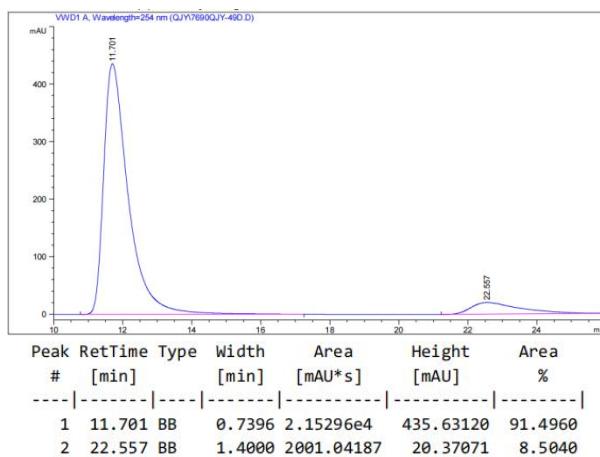

### 3. General procedure for synthesis of $\alpha,\beta$ -Unsaturated ketone

**Method 1: (1c-1h ,1j-1n ,1p ,1s-1u ,1w-1z ,1ab ,1ae ,1ai ,1ak-1an ,1ap ,1as)**

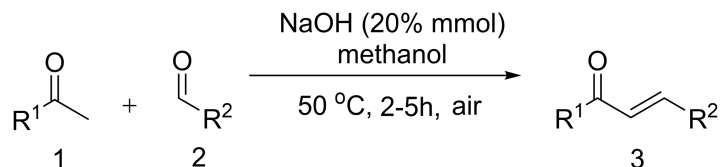

Scheme S1 Synthesis of  $\alpha,\beta$ -unsaturated ketones.

Ketone 1 (10 mmol), Aldehydes 2 (10 mmol), NaOH (20 mol %), and methanol (20 mL) were introduced in a flask (50 mL). Then, it was stirred at 50 °C under atmosphere for 2~5 hours. After cooling down to room temperature, the reaction mixture was concentrated by removing the solvent under vacuum, and the residue was purified by column chromatography.<sup>[4]</sup>

**Method 2: (1aj ,1at)**

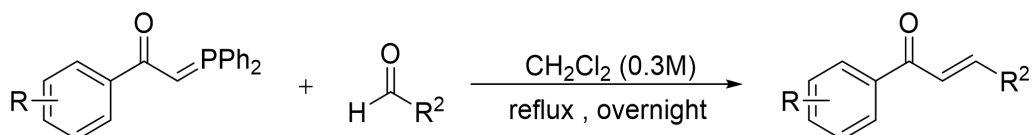

Scheme S2 Synthesis of  $\alpha,\beta$ -unsaturated ketones.

To a solution of the aldehyde (10 mmol, 1 equiv.) in  $\text{CH}_2\text{Cl}_2$  (33 mL) phosphonium ylide (13 mmol, 1.3 equiv.) was added in one portion. The mixture was refluxed for 16h. Then, the solvent was evaporated and hexane was added. Triphenylphosphine oxide precipitated and was then filtered off. the filtrate was concentrated under reduced pressure. The residue was purified by flash chromatography.<sup>[5]</sup>

## Characterisation of $\alpha,\beta$ -unsaturated ketone substrates

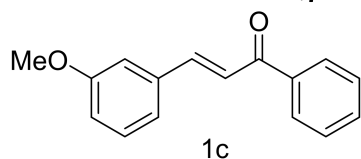

### (*E*)-3-(3-methoxyphenyl)-1-phenylprop-2-en-1-one

$^1\text{H NMR}$  (400 MHz, Chloroform-*d*)  $\delta$  8.04 – 7.99 (m, 2H), 7.77 (d,  $J = 15.7$  Hz, 1H), 7.62 – 7.46 (m, 4H), 7.32 (t,  $J = 7.9$  Hz, 1H), 7.23 (dt,  $J = 7.6, 1.3$  Hz, 1H), 7.17 – 7.10 (m, 1H), 6.95 (ddd,  $J = 8.1, 2.6, 1.0$  Hz, 1H), 3.83 (s, 3H).

$^{13}\text{C NMR}$  (101 MHz, Chloroform-*d*)  $\delta$  190.57, 159.94, 144.82, 138.15, 136.24, 132.89, 130.01, 128.69, 128.56, 122.33, 121.15, 116.34, 113.45, 55.37.

White solid (2.14 g, 90% yield).

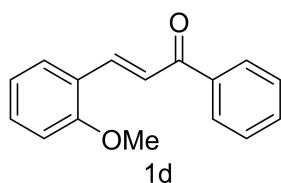

### (*E*)-3-(2-methoxyphenyl)-1-phenylprop-2-en-1-one

$^1\text{H NMR}$  (400 MHz, Chloroform-*d*)  $\delta$  8.13 (d,  $J = 15.9$  Hz, 1H), 8.04 – 8.00 (m, 2H), 7.65 (d,  $J = 2.0$  Hz, 1H), 7.63 – 7.60 (m, 1H), 7.60 – 7.54 (m, 1H), 7.52 – 7.46 (m, 2H), 7.39 – 7.35 (m, 1H), 7.00 (t,  $J = 7.5$  Hz, 1H), 6.94 (d,  $J = 9.3$  Hz, 1H), 3.90 (s, 3H).

$^{13}\text{C NMR}$  (101 MHz,  $\text{CDCl}_3$ )  $\delta$  191.20, 158.82, 140.48, 138.51, 132.62, 131.85, 129.28, 128.59, 128.57, 123.87, 122.82, 120.76, 111.23, 55.57.

Yellow solid (2.18 g, 92% yield).

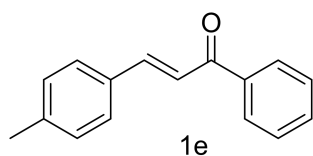

### (*E*)-1-phenyl-3-(p-tolyl)prop-2-en-1-one

$^1\text{H NMR}$  (400 MHz, Chloroform-*d*)  $\delta$  7.94 – 7.88 (m, 2H), 7.69 (d,  $J = 15.7$  Hz, 1H), 7.50 – 7.34 (m, 6H), 7.11 (d,  $J = 7.9$  Hz, 2H), 2.27 (s, 3H).

$^{13}\text{C NMR}$  (101 MHz, Chloroform-*d*)  $\delta$  190.67, 144.99, 141.14, 138.37, 132.72, 132.16, 129.75, 128.63, 128.54, 128.51, 121.08, 21.58.

Yellow solid (1.82 g, 82% yield).

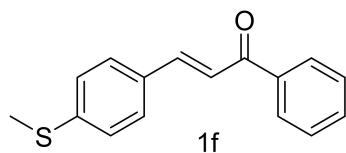

### (*E*)-3-(4-(methylthio)phenyl)-1-phenylprop-2-en-1-one

$^1\text{H NMR}$  (400 MHz, Chloroform-*d*)  $\delta$  8.04 – 7.98 (m, 2H), 7.77 (d,  $J = 15.7$  Hz, 1H), 7.62 – 7.46 (m, 6H), 7.27 – 7.22 (m, 2H), 2.51 (s, 3H).

$^{13}\text{C NMR}$  (101 MHz, Chloroform-*d*)  $\delta$  190.50, 144.39, 142.46, 138.29, 132.79, 131.29, 128.88, 128.66, 128.50, 125.88, 120.89, 15.10.

Yellow solid (1.96 g, 78% yield).

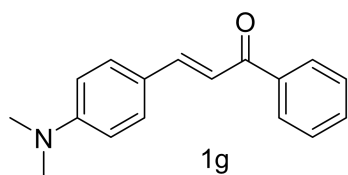

**(E)-3-(4-(dimethylamino)phenyl)-1-phenylprop-2-en-1-one**

<sup>1</sup>H NMR (400 MHz, Chloroform-*d*) δ 8.06 – 7.99 (m, 2H), 7.81 (d, *J* = 15.4 Hz, 1H), 7.58 – 7.53 (m, 3H), 7.49 (dd, *J* = 8.2, 6.5 Hz, 2H), 7.34 (d, *J* = 15.5 Hz, 1H), 6.68 (d, *J* = 8.9 Hz, 2H), 3.03 (s, 6H).

<sup>13</sup>C NMR (101 MHz, Chloroform-*d*) δ 190.57, 151.94, 145.86, 138.95, 132.13, 130.40, 128.41, 128.25, 122.40, 116.62, 111.70, 40.04.

Yellow solid (2.31 g, 92% yield).

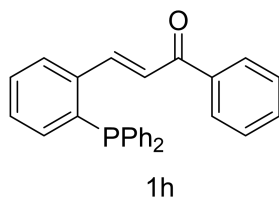

**(E)-3-(2-(diphenylphosphanyl)phenyl)-1-phenylprop-2-en-1-one**

<sup>1</sup>H NMR (400 MHz, Chloroform-*d*) δ 8.36 (dd, *J* = 15.8, 4.5 Hz, 1H), 7.78 – 7.69 (m, 3H), 7.43 – 7.37 (m, 4H), 7.36 – 7.31 (m, 6H), 7.30 – 7.24 (m, 5H), 7.18 (d, *J* = 15.8 Hz, 1H), 6.98 – 6.87 (m, 1H).

<sup>13</sup>C NMR (101 MHz, Chloroform-*d*) δ 191.97, 143.69, 143.45, 139.67 (d, *J* = 21.9 Hz), 138.43 (d, *J* = 16.4 Hz), 137.93, 135.84 (d, *J* = 9.9 Hz), 134.21, 134.01, 133.74, 132.50, 131.99 (d, *J* = 9.8 Hz), 130.02, 129.18, 129.04, 128.74, 128.71, 128.67, 128.51, 126.98 (d, *J* = 4.0 Hz), 125.60 (d, *J* = 3.2 Hz).

Yellow solid (2.66 g, 68% yield).

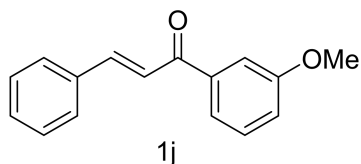

**(E)-1-(3-methoxyphenyl)-3-phenylprop-2-en-1-one**

<sup>1</sup>H NMR (400 MHz, Chloroform-*d*) δ 7.77 (d, *J* = 15.7 Hz, 1H), 7.59 – 7.45 (m, 5H), 7.32 (p, *J* = 4.6 Hz, 4H), 7.05 (dd, *J* = 8.1, 2.7 Hz, 1H), 3.75 (s, 3H).

<sup>13</sup>C NMR (101 MHz, Chloroform-*d*) δ 189.84, 159.89, 144.65, 139.53, 134.85, 130.56, 129.61, 128.95, 128.52, 121.94, 121.06, 119.19, 112.98, 55.31.

Yellow solid (2.02 g, 85% yield).

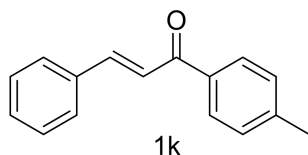

**(E)-3-phenyl-1-(p-tolyl)prop-2-en-1-one**

<sup>1</sup>H NMR (400 MHz, Chloroform-*d*) δ 7.94 (d, *J* = 8.2 Hz, 2H), 7.81 (d, *J* = 15.7 Hz, 1H), 7.67 – 7.61 (m, 2H), 7.54 (d, *J* = 15.7 Hz, 1H), 7.41 (dd, *J* = 5.0, 2.0 Hz, 3H), 7.29 (d, *J* = 8.0 Hz, 2H), 2.42 (s, 3H).

<sup>13</sup>C NMR (101 MHz, Chloroform-*d*) δ 190.02, 144.44, 143.72, 135.62, 134.99, 130.50, 129.39, 128.98, 128.71, 128.47, 122.03, 21.74.

Yellow solid (1.38 g, 62% yield).

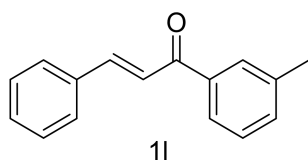

**(E)-3-phenyl-1-(m-tolyl)prop-2-en-1-one**

<sup>1</sup>H NMR (400 MHz, Chloroform-*d*) δ 7.85 – 7.74 (m, 3H), 7.68 – 7.59 (m, 2H), 7.52 (d, *J* = 15.7 Hz, 1H), 7.41–7.31 (m, 5H), 2.42 (s, 3H).

<sup>13</sup>C NMR (101 MHz, Chloroform-*d*) δ 190.75, 144.71, 138.51, 138.24, 134.93, 133.67, 130.57, 129.09, 129.00, 128.54, 128.51, 125.76, 122.20, 21.47.

Yellow solid (1.55 g, 70% yield).

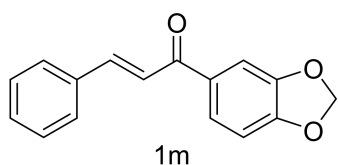

**(E)-1-(benzo[d][1,3]dioxol-5-yl)-3-phenylprop-2-en-1-one**

<sup>1</sup>H NMR (400 MHz, Chloroform-*d*) δ 7.79 (d, *J* = 15.6 Hz, 1H), 7.68 – 7.61 (m, 3H), 7.53 (d, *J* = 1.7 Hz, 1H), 7.49 (d, *J* = 15.6 Hz, 1H), 7.43 – 7.39 (m, 3H), 6.89 (d, *J* = 8.2 Hz, 1H), 6.05 (s, 2H).

<sup>13</sup>C NMR (101 MHz, Chloroform-*d*) δ 188.27, 151.75, 148.32, 144.29, 134.96, 132.93, 130.47, 128.97, 128.43, 124.74, 121.63, 108.45, 107.95, 101.93.

White solid (1.36 g, 54% yield).

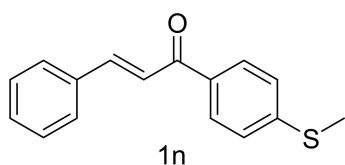

**(E)-3-(3-methoxyphenyl)-1-phenylprop-2-en-1-one**

<sup>1</sup>H NMR (400 MHz, Chloroform-*d*) δ 7.96 (d, *J* = 8.5 Hz, 2H), 7.82 (d, *J* = 15.6 Hz, 1H), 7.68 – 7.61 (m, 2H), 7.53 (d, *J* = 15.6 Hz, 1H), 7.45 – 7.39 (m, 3H), 7.30 (d, *J* = 8.5 Hz, 2H), 2.53 (s, 3H).

<sup>13</sup>C NMR (101 MHz, Chloroform-*d*) δ 189.20, 145.75, 144.54, 134.93, 134.36, 130.55, 129.00, 128.48, 125.04, 121.67, 14.80.

Yellow solid (1.32 g, 52% yield).

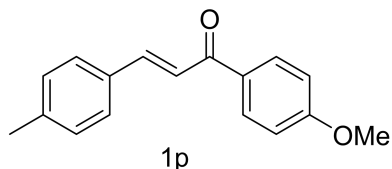

**(E)-1-(4-methoxyphenyl)-3-(p-tolyl)prop-2-en-1-one**

<sup>1</sup>H NMR (400 MHz, Chloroform-*d*) δ 8.04 (d, *J* = 8.9 Hz, 2H), 7.79 (d, *J* = 15.6 Hz, 1H), 7.60 – 7.45 (m, 3H), 7.22 (d, *J* = 7.9 Hz, 2H), 6.98 (d, *J* = 8.9 Hz, 2H), 3.88 (s, 3H), 2.39 (s, 3H).

<sup>13</sup>C NMR (101 MHz, Chloroform-*d*) δ 188.82, 163.36, 144.09, 140.88, 132.32, 131.20, 130.81, 129.71, 128.44, 120.79, 113.83, 55.51, 21.57.

Yellow solid (1.73g, 69% yield).

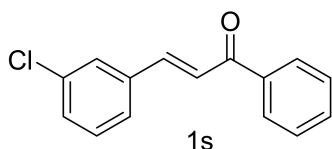

**(E)-3-(3-chlorophenyl)-1-phenylprop-2-en-1-one**

<sup>1</sup>H NMR (400 MHz, Chloroform-*d*) δ 8.04 – 8.00 (m, 2H), 7.72 (d, *J* = 15.7 Hz, 1H), 7.65 – 7.55 (m, 2H), 7.57 – 7.45 (m, 4H), 7.37 – 7.32 (m, 2H).

<sup>13</sup>C NMR (101 MHz, Chloroform-*d*) δ 190.10, 143.09, 137.87, 136.70, 134.97, 133.10, 130.39, 130.26, 128.75, 128.58, 127.93, 126.87, 123.15.

Yellow solid (1.59 g, 66% yield).

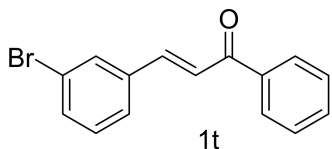

**(E)-3-(3-bromophenyl)-1-phenylprop-2-en-1-one**

<sup>1</sup>H NMR (400 MHz, Chloroform-*d*) δ 8.07 – 7.99 (m, 2H), 7.80 (t, *J* = 1.8 Hz, 1H), 7.73 (d, *J* = 15.7 Hz, 1H), 7.65 – 7.58 (m, 1H), 7.58 – 7.48 (m, 5H), 7.30 (t, *J* = 7.8 Hz, 1H).

<sup>13</sup>C NMR (101 MHz, Chloroform-*d*) δ 190.08, 142.98, 137.82, 133.25, 133.06, 130.80, 130.48, 128.93, 128.71, 128.63, 128.53, 127.28, 123.14.

Yellow solid (2.05g, 72% yield).

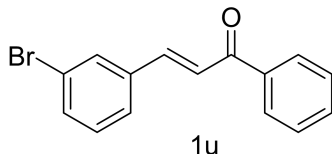

**(E)-3-(2-bromophenyl)-1-phenylprop-2-en-1-one**

<sup>1</sup>H NMR (400 MHz, Chloroform-*d*) δ 8.17 (d, *J* = 15.7 Hz, 1H), 8.11 – 8.02 (m, 2H), 7.77 (dd, *J* = 7.8, 1.7 Hz, 1H), 7.71 – 7.60 (m, 2H), 7.55 (dd, *J* = 8.2, 6.7 Hz, 2H), 7.47 (d, *J* = 15.8 Hz, 1H), 7.39 (td, *J* = 7.6, 1.3 Hz, 1H), 7.29 (dd, *J* = 7.7, 1.6 Hz, 1H).

<sup>13</sup>C NMR (101 MHz, Chloroform-*d*) δ 190.40, 143.20, 137.87, 135.03, 133.57, 133.01, 131.40, 128.71, 128.68, 127.91, 127.77, 125.93, 125.00.

Yellow solid (2.11g, 74% yield).

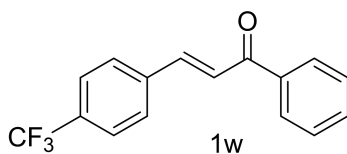

**(E)-1-phenyl-3-(4-(trifluoromethyl)phenyl)prop-2-en-1-one**

<sup>1</sup>H NMR (400 MHz, Chloroform-*d*) δ 8.05 – 8.01 (m, 2H), 7.81 (d, *J* = 15.8 Hz, 1H), 7.74 (d, *J* = 8.2 Hz, 2H), 7.67 (d, *J* = 8.2 Hz, 2H), 7.65 – 7.57 (m, 2H), 7.52 (dd, *J* = 8.3, 6.8 Hz, 2H).

<sup>13</sup>C NMR (101 MHz, Chloroform-*d*) δ 188.99, 141.70, 137.18, 136.69, 132.14, 130.96, 130.64, 127.72, 127.53, 127.48, 124.86 (CF<sub>3</sub>, q, *J* = 3.8 Hz), 123.09.

Yellow solid (1.68 g, 61% yield).

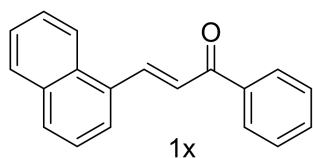

**(E)-3-(naphthalen-1-yl)-1-phenylprop-2-en-1-one**

**<sup>1</sup>H NMR** (400 MHz, Chloroform-*d*)  $\delta$  8.70 (d,  $J = 15.4$  Hz, 1H), 8.30 – 8.23 (m, 1H), 8.14 – 8.06 (m, 2H), 7.97 – 7.86 (m, 3H), 7.69 – 7.49 (m, 7H).

**<sup>13</sup>C NMR** (101 MHz, Chloroform-*d*)  $\delta$  190.41, 141.82, 138.16, 133.76, 133.00, 132.34, 131.79, 130.92, 128.83, 128.76, 128.66, 127.06, 126.37, 125.51, 125.16, 124.60, 123.52.

Yellow solid (1.59 g, 62% yield).

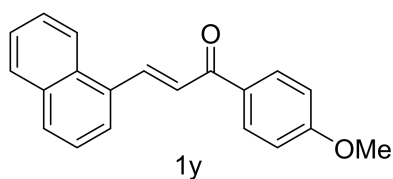

**(E)-1-(4-methoxyphenyl)-3-(naphthalen-1-yl)prop-2-en-1-one**

**<sup>1</sup>H NMR** (400 MHz, Chloroform-*d*)  $\delta$  8.65 (d,  $J = 15.3$  Hz, 1H), 8.29 – 8.23 (m, 1H), 8.12 – 8.05 (m, 2H), 7.96 – 7.84 (m, 3H), 7.67 – 7.46 (m, 4H), 7.05 – 6.95 (m, 2H), 3.88 (s, 3H)

**<sup>13</sup>C NMR** (101 MHz, CDCl<sub>3</sub>)  $\delta$  190.41, 141.82, 138.16, 133.76, 133.00, 132.34, 131.79, 130.92, 128.83, 128.76, 128.66, 127.06, 126.37, 125.51, 125.16, 124.60, 123.52.

Yellow solid (1.93 g, 67% yield).

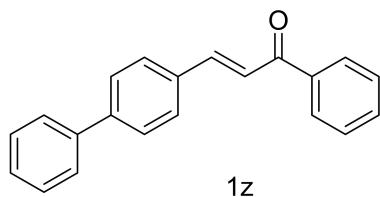

**(E)-3-([1,1'-biphenyl]-4-yl)-1-phenylprop-2-en-1-one**

**<sup>1</sup>H NMR** (400 MHz, Chloroform-*d*)  $\delta$  8.09 – 8.03 (m, 2H), 7.88 (d,  $J = 15.7$  Hz, 1H), 7.73 (d,  $J = 8.4$  Hz, 2H), 7.69 – 7.45 (m, 10H), 7.42 – 7.37 (m, 1H).

**<sup>13</sup>C NMR** (101 MHz, Chloroform-*d*)  $\delta$  190.49, 144.46, 143.32, 140.11, 138.27, 133.85, 132.90, 129.09, 129.01, 128.73, 128.59, 128.00, 127.64, 127.12, 121.83.

Yellow solid (2.07g, 73% yield).

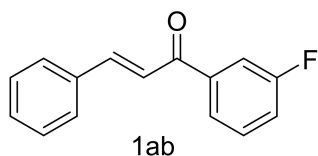

**(E)-1-(3-fluorophenyl)-3-phenylprop-2-en-1-one**

**<sup>1</sup>H NMR** (400 MHz, Chloroform-*d*)  $\delta$  7.88 – 7.77 (m, 2H), 7.70 (dt,  $J = 9.5, 2.1$  Hz, 1H), 7.67 – 7.62 (m, 2H), 7.52 – 7.45 (m, 2H), 7.44 – 7.41 (m, 3H), 7.31 – 7.25 (m, 1H).

**<sup>13</sup>C NMR** (101 MHz, Chloroform-*d*)  $\delta$  189.15 (d,  $J = 2.2$  Hz), 162.89 (d,  $J = 247.9$  Hz), 145.61, 140.32 (d,  $J = 6.2$  Hz), 134.64, 130.85, 130.32 (d,  $J = 7.6$  Hz), 129.04, 128.58, 124.20 (d,  $J = 3.0$  Hz), 121.49, 119.82 (d,  $J = 21.3$  Hz), 115.32 (d,  $J = 22.3$  Hz).

Yellow solid (1.60g, 71% yield).

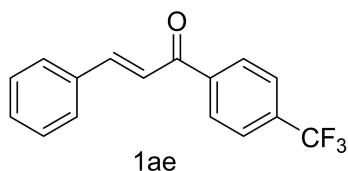

**(E)-3-phenyl-1-(4-(trifluoromethyl)phenyl)prop-2-en-1-one**

<sup>1</sup>H NMR (400 MHz, Chloroform-*d*) δ 8.10 (d, *J* = 8.1 Hz, 2H), 7.83 (d, *J* = 15.8 Hz, 1H), 7.77 (d, *J* = 8.2 Hz, 2H), 7.67 – 7.63 (m, 2H), 7.50 (d, *J* = 15.7 Hz, 1H), 7.46 – 7.40 (m, 3H).

<sup>13</sup>C NMR (101 MHz, Chloroform-*d*) δ 189.67, 146.16, 141.03, 134.49, 134.17, 133.85, 131.03, 129.09, 128.81, 128.65, 125.69 (q, *J* = 3.8 Hz), 121.51.

Yellow solid (2.26 g, 82% yield).

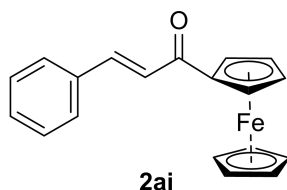

<sup>1</sup>H NMR (400 MHz, Chloroform-*d*) δ 7.73 (d, *J* = 15.6 Hz, 1H), 7.63 – 7.55 (m, 2H), 7.45 – 7.28 (m, 3H), 7.06 (d, *J* = 15.7 Hz, 1H), 4.84 (t, *J* = 2.0 Hz, 2H), 4.52 (t, *J* = 1.9 Hz, 2H), 4.14 (s, 5H).

<sup>13</sup>C NMR (101 MHz, Chloroform-*d*) δ 193.04, 140.90, 135.16, 130.18, 128.99, 128.32, 122.92, 80.60, 72.89, 70.16, 69.78.

Red solid (2.11 g, 67% yield).

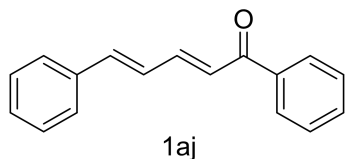

**(2E,4E)-1,5-diphenylpenta-2,4-dien-1-one**

<sup>1</sup>H NMR (400 MHz, Chloroform-*d*) δ 8.01 – 7.94 (m, 2H), 7.65 – 7.51 (m, 2H), 7.52 – 7.43 (m, 4H), 7.40 – 7.30 (m, 3H), 7.08 (d, *J* = 14.9 Hz, 1H), 7.00 (d, *J* = 8.4 Hz, 2H).

<sup>13</sup>C NMR (101 MHz, Chloroform-*d*) δ 190.50, 144.89, 141.97, 138.24, 136.13, 132.71, 129.27, 128.90, 128.63, 128.43, 127.34, 126.97, 125.44.

Yellow solid (1.61g, 69% yield).

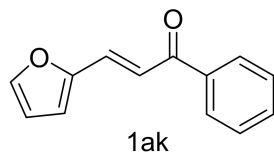

**(E)-3-(furan-2-yl)-1-phenylprop-2-en-1-one**

<sup>1</sup>H NMR (400 MHz, Chloroform-*d*) δ 8.10 – 8.00 (m, 2H), 7.67 – 7.39 (m, 6H), 6.71 (d, *J* = 3.4 Hz, 1H), 6.50 (dd, *J* = 3.4, 1.8 Hz, 1H).

<sup>13</sup>C NMR (101 MHz, Chloroform-*d*) δ 189.80, 151.65, 144.98, 138.12, 132.81, 130.69, 128.64, 128.44, 119.26, 116.33, 112.73.

Yellow solid ( 1.36g, 69% yield).



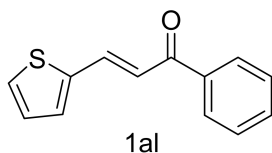

**(E)-1-phenyl-3-(thiophen-2-yl)prop-2-en-1-one**

<sup>1</sup>H NMR (400 MHz, Chloroform-*d*) δ 8.04 – 7.97 (m, 2H), 7.94 (d, *J* = 15.3 Hz, 1H), 7.60 – 7.53 (m, 1H), 7.52 – 7.44 (m, 2H), 7.39 (dt, *J* = 5.1, 1.0 Hz, 1H), 7.36 – 7.29 (m, 2H), 7.06 (dd, *J* = 5.1, 3.6 Hz, 1H).

<sup>13</sup>C NMR (101 MHz, Chloroform-*d*) δ 189.87, 140.38, 138.09, 137.27, 132.85, 132.23, 128.94, 128.68, 128.45, 120.71.

Yellow solid (1.82 g, 85% yield).

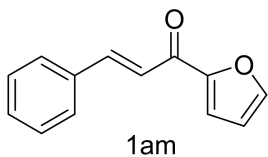

**(E)-1-(furan-2-yl)-3-phenylprop-2-en-1-one**

<sup>1</sup>H NMR (400 MHz, Chloroform-*d*) δ 7.88 (d, *J* = 15.8 Hz, 1H), 7.66 – 7.62 (m, 3H), 7.48 – 7.38 (m, 4H), 7.34 (d, *J* = 3.5 Hz, 1H), 6.59 (dd, *J* = 3.6, 1.7 Hz, 1H).

<sup>13</sup>C NMR (101 MHz, Chloroform-*d*) δ 178.01, 153.68, 146.61, 143.99, 134.70, 130.65, 128.97, 128.56, 121.14, 117.62, 112.60.

Yellow solid (1.42 g, 72% yield).

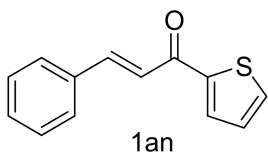

**(E)-3-phenyl-1-(thiophen-2-yl)prop-2-en-1-one**

<sup>1</sup>H NMR (400 MHz, Chloroform-*d*) δ 7.89 – 7.83 (m, 2H), 7.68 (dd, *J* = 5.0, 1.1 Hz, 1H), 7.66 – 7.62 (m, 2H), 7.46 – 7.40 (m, 4H), 7.18 (dd, *J* = 4.9, 3.8 Hz, 1H).

<sup>13</sup>C NMR (101 MHz, Chloroform-*d*) δ 182.08, 145.55, 144.10, 134.70, 133.99, 131.90, 130.65, 129.01, 128.53, 128.32, 121.60.

Yellow solid (1.19 g, 56% yield).

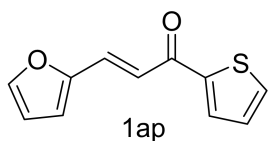

**(E)-3-(furan-2-yl)-1-(thiophen-2-yl)prop-2-en-1-one**

<sup>1</sup>H NMR (400 MHz, Chloroform-*d*) δ 7.85 (dd, *J* = 3.8, 1.2 Hz, 1H), 7.66 (dd, *J* = 5.0, 1.1 Hz, 1H), 7.60 (d, *J* = 15.2 Hz, 1H), 7.53 (d, *J* = 1.8 Hz, 1H), 7.33 (d, *J* = 15.2 Hz, 1H), 7.17 (dd, *J* = 4.9, 3.8 Hz, 1H), 6.72 (d, *J* = 3.4 Hz, 1H), 6.51 (dd, *J* = 3.4, 1.8 Hz, 1H).

<sup>13</sup>C NMR (101 MHz, Chloroform-*d*) δ 181.74, 151.47, 145.67, 145.03, 133.89, 131.76, 129.96, 128.30, 119.08, 116.47, 112.76.

Yellow solid (1.08 g, 53% yield).

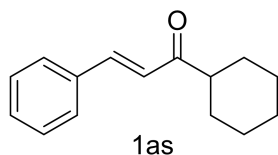

**(E)-1-cyclohexyl-3-phenylprop-2-en-1-one**

<sup>1</sup>H NMR (400 MHz, Chloroform-*d*) δ 7.62 – 7.50 (m, 3H), 7.35 (dd, *J* = 4.8, 1.9 Hz, 3H), 6.80 (d, *J* = 16.0 Hz, 1H), 2.64 (tt, *J* = 11.3, 3.4 Hz, 1H), 1.94 – 1.85 (m, 2H), 1.81 (ddd, *J* = 10.6, 5.4, 2.3 Hz, 2H), 1.73 – 1.65 (m, 1H), 1.48 – 1.18 (m, 5H).

<sup>13</sup>C NMR (101 MHz, Chloroform-*d*) δ 203.05, 142.19, 134.75, 130.29, 128.89, 128.27, 124.72, 49.38, 28.73, 25.93, 25.78.

Yellow solid (1.49 g, 70% yield).

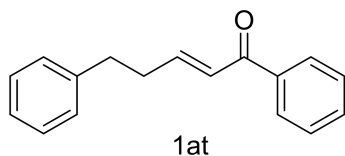

**(E)-1,5-diphenylpent-2-en-1-one**

<sup>1</sup>H NMR (400 MHz, Chloroform-*d*) δ 7.84 – 7.69 (m, 2H), 7.46 – 7.37 (m, 1H), 7.32 (t, *J* = 7.6 Hz, 2H), 7.23 – 7.14 (m, 2H), 7.09 (dd, *J* = 7.3, 5.4 Hz, 3H), 7.02 – 6.90 (m, 1H), 6.74 (dt, *J* = 15.4, 1.6 Hz, 1H), 2.72 (t, *J* = 7.7 Hz, 2H), 2.57 – 2.45 (m, 2H).

<sup>13</sup>C NMR (101 MHz, Chloroform-*d*) δ 190.85, 148.54, 140.89, 137.90, 132.77, 128.63, 128.60, 128.56, 128.50, 126.56, 126.28.

Yellow oil (1.82 g, 85% yield).

## 4. Conversion of Chiral phosphine compound

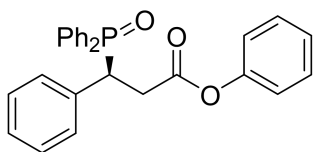

### phenyl (S)-3-(diphenylphosphoryl)-3-phenylpropanoate<sup>[6]</sup>

A 10-mL Schlenk tube was charged with (S)-3-(Diphenylphosphinyl)-1,3-diphenylpropan-1-one (98% ee, 123.mg, 0.30mmol), mCPBA (273 mg, 1.2 mmol, about 70% purity, Aldrich), trifluoroacetic acid (48  $\mu$ L, 0.60 mmol) and in  $\text{CH}_2\text{Cl}_2$  (2.4 mL). The solution was stirred with refluxing for 48 h. The organic phase was washed with saturated aqueous  $\text{NaHCO}_3$  (3x20 mL), extracted with  $\text{CH}_2\text{Cl}_2$ , dried over  $\text{Na}_2\text{SO}_4$  and filtered. The filtrate was concentrated in vacuo and the residue was purified by flash column chromatography (DCM/MeOH= 70:1) to afford the product as White solid (71mg, 54% yield,96% ee).

$^1\text{H NMR}$  (400 MHz, Chloroform-*d*)  $\delta$  8.08 – 7.92 (m, 2H), 7.63 – 7.54 (m, 3H), 7.54 – 7.43 (m, 2H), 7.38 – 7.30 (m, 3H), 7.29 – 7.19 (m, 7H), 7.17 – 7.11 (m, 1H), 6.68 (dd,  $J = 7.8, 1.6$  Hz, 2H), 4.16 (ddd,  $J = 10.7, 7.6, 3.2$  Hz, 1H), 3.38 (ddd,  $J = 16.2, 11.5, 6.6$  Hz, 1H), 3.13 (ddd,  $J = 16.2, 8.2, 3.6$  Hz, 1H).

$^{13}\text{C NMR}$  (101 MHz, Chloroform-*d*)  $\delta$  170.10 (d,  $J = 18.0$  Hz), 150.36, 134.52, 132.30 (d,  $J = 2.4$  Hz), 131.74, 131.46 (d,  $J = 8.6$  Hz), 131.19, 131.10, 130.29, 129.85 (d,  $J = 5.3$  Hz), 129.32, 129.12, 129.00, 128.48 (d,  $J = 1.7$  Hz), 128.28, 128.16, 127.59 (d,  $J = 2.2$  Hz), 125.90, 121.32, 43.22 (d,  $J = 67.9$  Hz), 35.02.

HPLC analysis: Chiracel-ODH, n-heptane/*i*-PrOH= 90:10, 1 mL/min, 22°C, detection at 210nm. Retention time (min): 20.89 (minor) and 8.90 (major).

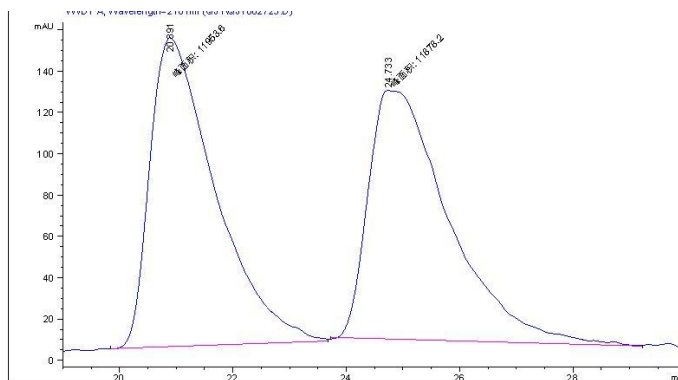

| Peak # | RetTime [min] | Type | Width [min] | Area [mAU*s] | Height [mAU] | Area %  |
|--------|---------------|------|-------------|--------------|--------------|---------|
| 1      | 20.891        | MM   | 1.3327      | 1.19536e4    | 149.49181    | 50.1582 |
| 2      | 24.733        | MM   | 1.6454      | 1.18782e4    | 120.31526    | 49.8418 |

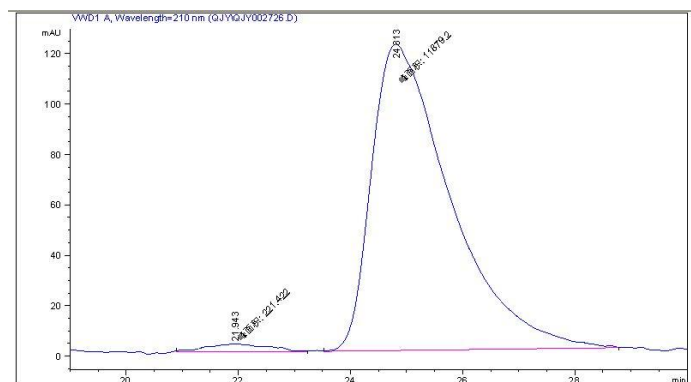

| Peak # | RetTime [min] | Type | Width [min] | Area [mAU*s] | Height [mAU] | Area %  |
|--------|---------------|------|-------------|--------------|--------------|---------|
| 1      | 21.943        | MM   | 1.2348      | 221.42233    | 2.98867      | 1.8298  |
| 2      | 24.813        | MM   | 1.6292      | 1.18792e4    | 121.52374    | 98.1702 |

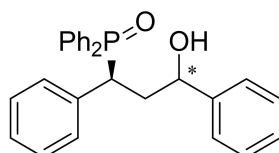

### **((1S,3S)-3-hydroxy-1,3-diphenylpropyl)diphenylphosphine oxide<sup>61</sup>**

A 10-mL Schlenk tube was charged with (S)-3-(Diphenylphosphinyl)-1,3-diphenylpropan-1-one (98% ee, 123 mg, 0.30 mmol), NaBH<sub>4</sub> (13.5 mg, 0.36 mmol) in MeOH (2.4 mL). The solution was stirred with refluxing for 48 h. The organic phase was washed with saturated aqueous NaHCO<sub>3</sub> (3x20 mL), extracted with CH<sub>2</sub>Cl<sub>2</sub>, dried over Na<sub>2</sub>SO<sub>4</sub> and filtered. The filtrate was concentrated in vacuo and the residue was purified by flash column chromatography (DCM/MeOH=70:1) to afford the product as White solid (106 mg, 86% yield, 96% ee).

<sup>1</sup>H NMR (400 MHz, Chloroform-*d*) δ 7.66 – 7.50 (m, 3H), 7.44 (td, *J* = 7.6, 3.0 Hz, 2H), 7.38 – 7.11 (m, 15H), 4.48 (dd, *J* = 8.9, 5.2 Hz, 1H), 3.18 (ddd, *J* = 10.6, 9.4, 3.4 Hz, 1H), 2.72 (dddd, *J* = 13.9, 10.6, 6.7, 5.2 Hz, 1H), 2.31 (dddd, *J* = 13.9, 12.2, 8.9, 3.5 Hz, 1H).

<sup>13</sup>C NMR (101 MHz, Chloroform-*d*) δ 142.99, 135.22 (d, *J* = 5.7 Hz), 131.86 (d, *J* = 2.9 Hz), 131.46, 131.38, 131.34 (d, *J* = 2.7 Hz), 131.06, 130.98, 129.90 (d, *J* = 5.6 Hz), 128.74, 128.62, 128.55, 128.47 (d, *J* = 1.9 Hz), 128.04, 127.92, 127.22 (d, *J* = 2.5 Hz), 126.76, 72.34 (d, *J* = 13.3 Hz), 43.56 (d, *J* = 67.5 Hz), 38.68.

HPLC analysis: Chiracel-ODH, n-heptane/*i*-PrOH = 90:10, 1 mL/min, 22°C, detection at 254 nm. Retention time (min): 27.01 (minor) and 30.95 (major).

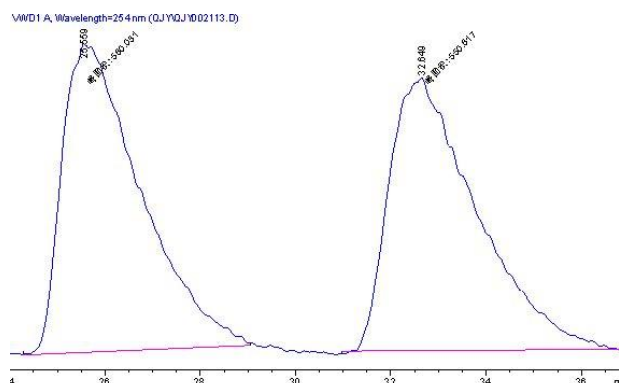

| Peak # | RetTime [min] | Type | Width [min] | Area [mAU*s] | Height [mAU] | Area %  |
|--------|---------------|------|-------------|--------------|--------------|---------|
| 1      | 25.559        | MM   | 1.9087      | 560.03064    | 4.89027      | 50.4238 |
| 2      | 32.649        | MM   | 2.1240      | 550.61694    | 4.32054      | 49.5762 |

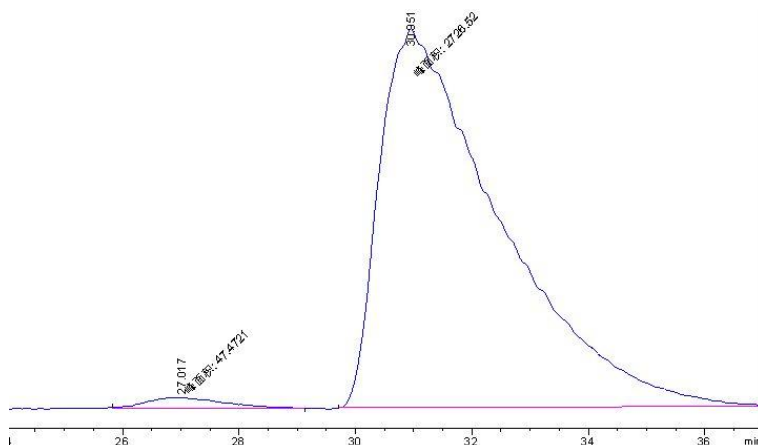

| Peak # | RetTime [min] | Type | Width [min] | Area [mAU*s] | Height [mAU] | Area %  |
|--------|---------------|------|-------------|--------------|--------------|---------|
| 1      | 27.017        | MM   | 1.4928      | 47.47207     | 5.29996e-1   | 1.7113  |
| 2      | 30.951        | MM   | 2.3897      | 2726.52441   | 19.01552     | 98.2887 |

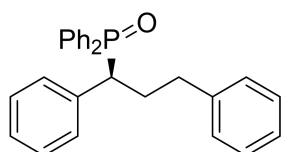

### (S)-(1,3-diphenylpropyl)diphenylphosphine oxide<sup>[6]</sup>

In an argon-filled glove box, an 8-mL vial was charged with (S)-3-(Diphenylphosphinyl)-1,3-diphenylpropan-1-one (98% ee, 123.mg, 0.30mmol), analytical-grade ethyl acetate (2 mL) and 5% Pd/C (32 mg, 0.015 mmol). The vial was placed in a 125-mL Parr bomb and pressurized with 30 psi of H<sub>2</sub> gas. The mixture was stirred at 25 °C for 48hours until completion as monitored by TLC. The mixture was passed through a pad of Celite with ethyl acetate washing (5 mL). After concentration of the filtrate, the residue was purified by flash chromatography (DCM/MeOH=70:1) to afford the titled compound as White solid (98 mg, 83% yield, 96% ee). <sup>1</sup>H NMR (400 MHz, Chloroform-*d*) δ 7.66 – 7.51 (m, 3H), 7.45 m, 2H), 7.39 – 7.30 (m, 3H), 7.28 (m, 4H), 7.22 – 7.11 (m, 8H), 4.48 (dd, *J* = 8.8, 5.4 Hz, 1H), 3.19 (td, *J* = 10.0, 3.5 Hz, 1H), 2.83 (s, 1H), 2.68 (m, 1H), 2.31 (m, 1H).

<sup>13</sup>C NMR (101 MHz, Chloroform-*d*) δ 142.94, 135.30, 131.88, 131.48, 131.39, 131.36, 131.08, 131.00, 130.54, 129.90 (d, *J* = 5.8 Hz), 128.73, 128.59 (d, *J* = 4.3 Hz), 128.48 (d, *J* = 2.0 Hz), 128.06 (d, *J* = 3.5 Hz), 127.93, 127.26, 126.71, 72.37 (d, *J* = 13.0 Hz), 43.61 (d, *J* = 67.5 Hz), 38.71.

HPLC analysis: Chiracel-ODH, n-heptane/*i*-PrOH= 90:10, 1 mL/min, 22°C, detection at 254nm. Retention time (min): 8.28 (major) and 11.49 (minor).

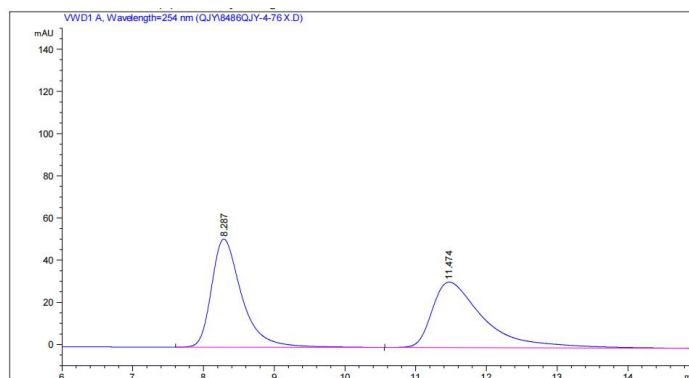

| Peak # | RetTime [min] | Type | Width [min] | Area [mAU*s] | Height [mAU] | Area %  |
|--------|---------------|------|-------------|--------------|--------------|---------|
| 1      | 8.287         | BB   | 0.4473      | 1522.36841   | 51.28486     | 49.1367 |
| 2      | 11.474        | BB   | 0.7529      | 1575.86353   | 31.06284     | 50.8633 |

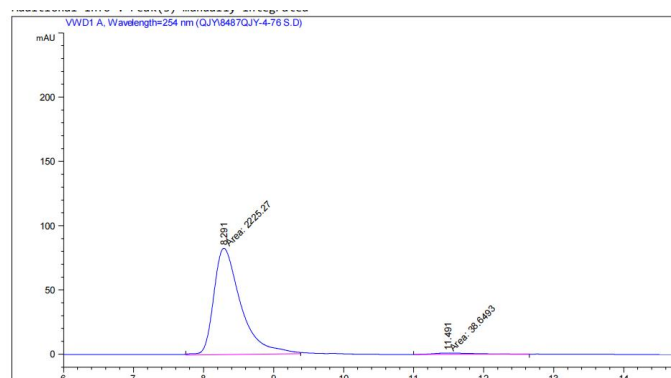

| Peak # | RetTime [min] | Type | Width [min] | Area [mAU*s] | Height [mAU] | Area %  |
|--------|---------------|------|-------------|--------------|--------------|---------|
| 1      | 8.291         | MM   | 0.4484      | 2225.26709   | 82.71955     | 98.2928 |
| 2      | 11.491        | MM   | 0.6568      | 38.64930     | 9.80792e-1   | 1.7072  |

### ((2S,4S)-pentane-2,4-diy)bis(diphenylphosphine oxide)<sup>[7]</sup>

An oven-dried 10 mL screw-capped vial containing **3av** (0.3 mmol, 1.0 equiv), AgOTf (0.03 mmol, 0.1 equiv), and DCE (2 mL) was added via syringe, dimethyl phosphate[HP(O)(OCH<sub>3</sub>)<sub>2</sub>] (0.75 mmol, 2.5 equiv), HOTf (0.3 mmol, 1.0 equiv), and then heated to 110 °C in an oil bath until the starting material has disappeared for 15 h (monitored by TLC). And then the solvent was removed in vacuo and residue was purified by column chromatography on a short silica gel column using DCM/MeOH as eluent to afford the desired product **7** (68% yield).

A mixture of **7** (188 mg, 0.4 mmol), ammonium formate (189.0 mg, 3.0 mmol) and palladium on carbon (10%, 38.3 mg) in MeOH (1.0 mL) was heated to reflux for 15 h under nitrogen atmosphere. After being cooled to room temperature, the mixture was diluted with EtOAc (15.0 mL). The catalyst was filtered off using a short pad of silica gel. The reaction mixture was evaporated to dryness in vacuo. The residue was diluted with H<sub>2</sub>O (5.0 mL) and extracted with EtOAc for three times. The combined organic layers were washed with saturated brine, dried (MgSO<sub>4</sub>), filtered and evaporated. The pale yellow oil obtained was purified by column chromatography (silica gel, DCM/MeOH=70:1) to give **8** in 76% yield as a colorless oil.

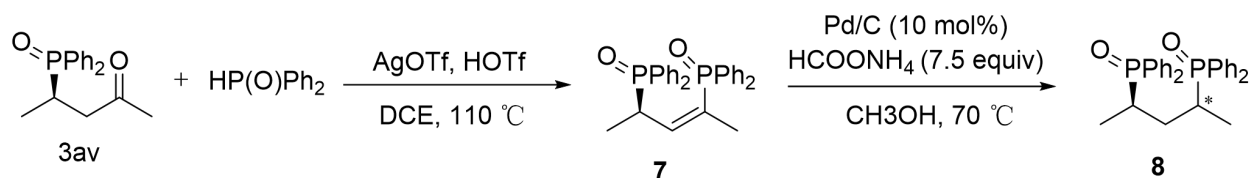

Scheme S3 Synthesis of **8**

$^1\text{H NMR}$  (400 MHz, Chloroform-*d*)  $\delta$  8.26 – 7.65 (m, 8H), 7.58 – 7.25 (m, 12H), 2.68 (dd,  $J = 8.8, 5.6$  Hz, 4H), 1.13 (dd,  $J = 16.4, 7.0$  Hz, 6H).

$^{13}\text{C NMR}$  (101 MHz, Chloroform-*d*)  $\delta$  132.36, 131.75 (d,  $J = 2.4$  Hz), 131.66 (d,  $J = 2.3$  Hz), 131.40, 131.05, 130.98 (d,  $J = 3.6$  Hz), 130.91, 130.72, 128.73 (d,  $J = 4.3$  Hz), 128.61 (d,  $J = 4.4$  Hz), 29.82 (d,  $J = 12.1$  Hz), 29.11 (d,  $J = 12.2$  Hz), 28.56, 11.70 (d,  $J = 2.4$  Hz).

**(3*S*,3'*S*)-3,3'-(1,3-phenylene)bis(3-(diphenylphosphoryl)-1-phenylpropan-1-one)**<sup>[8]</sup>

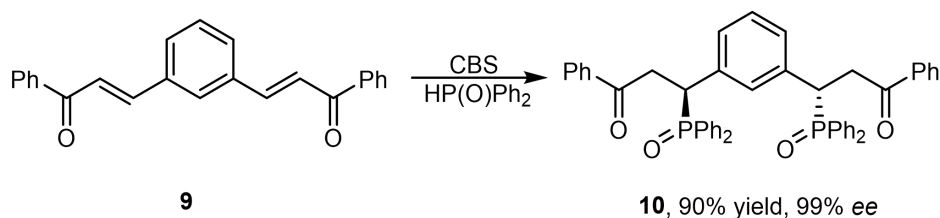

Scheme S4 Synthesis of **10**

$^1\text{H NMR}$  (400 MHz, Chloroform-*d*)  $\delta$  8.01 – 7.88 (m, 5H), 7.83 – 7.75 (m, 4H), 7.64 – 7.51 (m, 4H), 7.50 – 7.36 (m, 10H), 7.35 – 7.29 (m, 5H), 7.23 – 7.12 (m, 6H), 4.40 (dddd,  $J = 31.3, 9.8, 6.9, 2.5$  Hz, 2H), 3.91 (dddd,  $J = 55.9, 17.8, 10.1, 4.1$  Hz, 2H), 3.33 (dddd,  $J = 20.5, 18.0, 11.2, 2.4$  Hz, 2H).

$^{13}\text{C NMR}$  (101 MHz, Chloroform-*d*)  $\delta$  196.47 (d,  $J = 13.0$  Hz), 190.51, 144.56, 138.13, 136.89 (d,  $J = 5.5$  Hz), 136.23, 134.86, 133.53, 132.80, 132.25, 131.96 (d,  $J = 5.5$  Hz), 131.71 (d,  $J = 2.6$  Hz), 131.30 (d,  $J = 8.8$  Hz), 131.00, 130.91, 129.72 (d,  $J = 5.7$  Hz), 129.13, 129.02, 128.63 (d,  $J = 1.8$  Hz), 128.57, 128.29, 128.15, 127.53, 122.22, 41.08 (d,  $J = 68.6$  Hz), 38.80.

HPLC analysis: Chiracel-ODH, n-heptane/*i*-PrOH = 90:10, 1 mL/min, 22°C, detection at 254nm. Retention time (min): 21.16(minor) and 27.54(minor).

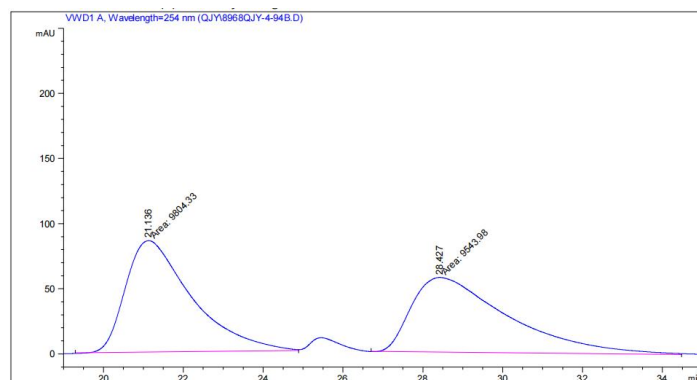

| Peak # | RetTime [min] | Type | Width [min] | Area [mAU*s] | Height [mAU] | Area %  |
|--------|---------------|------|-------------|--------------|--------------|---------|
| 1      | 21.136        | MM   | 1.9115      | 9804.33203   | 85.48429     | 50.6728 |
| 2      | 28.427        | MM   | 2.7814      | 9543.97852   | 57.18884     | 49.3272 |

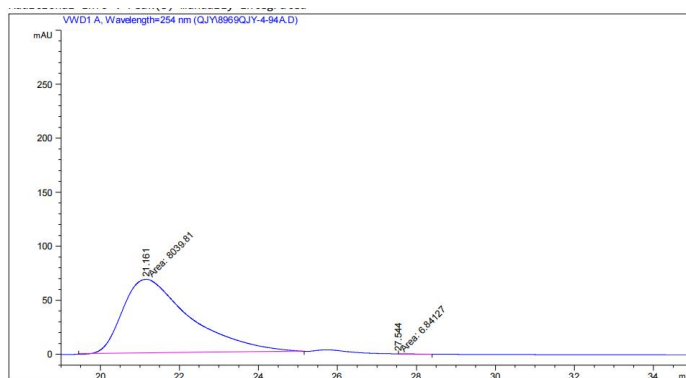

| Peak # | RetTime [min] | Type | Width [min] | Area [mAU*s] | Height [mAU] | Area %  |
|--------|---------------|------|-------------|--------------|--------------|---------|
| 1      | 21.161        | MM   | 1.9652      | 8039.81006   | 68.18500     | 99.9150 |
| 2      | 27.544        | MM   | 0.5229      | 6.84127      | 1.53532e-1   | 0.0850  |



## 5. Determination of absolute configuration

The absolute configuration was determined through the known compound as follow<sup>[8]</sup>.  $[\alpha]^{27}_D = -120.91$  ( $c = 0.0022$ ,  $\text{CHCl}_3$ ). By comparison to the reported optical rotations  $[\alpha]^{20}_D = -173$  ( $c = 1.00$ ,  $\text{CHCl}_3$  for optically pure product); the absolute configuration was determined to be (*S*).

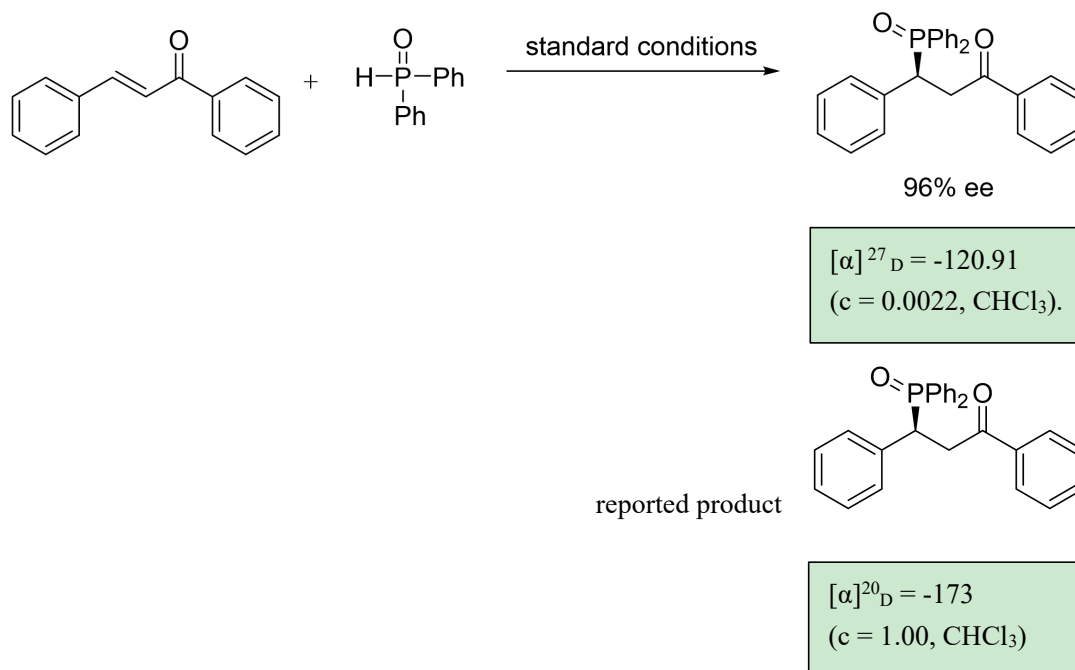

## 6. Calculation Detail and Atom Coordination

### DFT Methods

All computations were performed in ORCA 5.0.4.<sup>[9]</sup> Molecular geometries force constant and vibration frequency was calculated under Grimme's r<sup>2</sup>SCAN-3c composite method<sup>[10]</sup> in vacuum condition. Solvation effects were included in the single point energy calculation using the SMD<sup>[11]</sup> solvation model. Frequency calculations were carried out to confirm the stationary points as either minimum (no imaginary frequencies) or saddle points (one imaginary frequency) on the potential energy surface, and to obtain thermal corrections to the Gibbs free energies and enthalpy at 298 K by Shermo 2.3.5.<sup>[12]</sup> Intrinsic reaction coordinate (IRC) calculations were performed to ensure that the saddle points found were true transition states connecting the reactants and the products. Single-point energies were calculated with the M06-2X functional combined with the D3 dispersion correction with RIJCOSX approximations and using the def2-TZVP basis set<sup>[13]</sup>. Molecular structures were visualized using CYLview<sup>[14]</sup>, conformational searches were performed with the ABCluster3.0<sup>[15]</sup> with xTB<sup>[16]</sup> method to ensure that the lowest energy conformations of intermediates are presented.

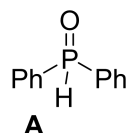

### The Cartesian coordinates (Å) and energies at 298.15 K for the optimized structures

|   |             |             |             |
|---|-------------|-------------|-------------|
| P | -0.02891100 | 1.20584200  | -0.76510200 |
| C | 1.46667600  | 0.30367700  | -0.25407500 |
| C | 2.01605300  | -0.73409900 | -1.01917200 |
| C | 2.06878700  | 0.67762000  | 0.95551700  |
| C | 3.14894600  | -1.41294900 | -0.56368800 |
| H | 1.56919300  | -1.00742800 | -1.97954400 |
| C | 3.20193900  | -0.00165300 | 1.40667500  |
| H | 1.64627200  | 1.51029500  | 1.52289200  |
| C | 3.73887100  | -1.04891900 | 0.65070900  |
| H | 3.57781400  | -2.22109500 | -1.16092700 |
| H | 3.67250200  | 0.28985500  | 2.34869100  |

|   |             |             |             |
|---|-------------|-------------|-------------|
| H | 4.62703100  | -1.57788500 | 1.00470500  |
| C | -1.45212500 | 0.17751100  | -0.26568900 |
| C | -1.54031500 | -1.19516500 | -0.53788000 |
| C | -2.48674200 | 0.82400500  | 0.42317700  |
| C | -2.66314800 | -1.91534500 | -0.12721400 |
| H | -0.72995600 | -1.70874200 | -1.06133100 |
| C | -3.60832400 | 0.09875200  | 0.83424400  |
| H | -2.39092100 | 1.89264200  | 0.62883200  |
| C | -3.69741900 | -1.26827500 | 0.55853800  |
| H | -2.73129400 | -2.98528100 | -0.33797400 |
| H | -4.41487100 | 0.60260100  | 1.37237200  |
| H | -4.57458100 | -1.83471700 | 0.88078700  |
| O | -0.12307500 | 2.60938500  | -0.24049400 |
| H | 0.00789400  | 1.04608600  | -2.18487100 |

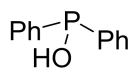

**B**

Charge: 0 Multiplicity: 1

Single Point Energy (M06-2X/def2-TZVP, SMD: in toluene): -880.468939 Hartree

Enthalpy (calculated by Shermo 2.3.5): -880.2517755 Hartree

Gibbs Free Energy (calculated by Shermo 2.3.5): -880.3300876 Hartree

|   |             |             |             |
|---|-------------|-------------|-------------|
| P | -0.00964700 | 1.08727700  | -1.25665300 |
| C | -1.41075600 | 0.03231500  | -0.67028700 |
| C | -1.12085400 | -1.28145800 | -0.29167700 |
| C | -2.71919200 | 0.50916400  | -0.52254200 |
| C | -2.11680000 | -2.10501700 | 0.22648000  |
| H | -0.10694700 | -1.65803000 | -0.40520300 |
| C | -3.71200400 | -0.31097700 | 0.00052300  |
| H | -2.96567200 | 1.52091800  | -0.83739700 |
| C | -3.41186000 | -1.61960800 | 0.37446200  |

|   |             |             |             |
|---|-------------|-------------|-------------|
| H | -1.88117400 | -3.12580300 | 0.51346900  |
| H | -4.72448300 | 0.06744400  | 0.11071100  |
| H | -4.19042800 | -2.26104200 | 0.77778500  |
| C | -0.92183700 | 2.17027600  | -2.43658800 |
| C | -1.65198800 | 1.59902200  | -3.48634200 |
| C | -0.81062200 | 3.56168300  | -2.36829100 |
| C | -2.27357200 | 2.40379800  | -4.43276200 |
| H | -1.74705400 | 0.51723800  | -3.55538700 |
| C | -1.43787400 | 4.36620400  | -3.31706000 |
| H | -0.22513000 | 4.01607100  | -1.57351000 |
| C | -2.17119600 | 3.79125600  | -4.34924300 |
| H | -2.84384500 | 1.94769800  | -5.23715900 |
| H | -1.34890200 | 5.44691200  | -3.24890000 |
| H | -2.65907100 | 4.41953800  | -5.08883200 |
| O | 0.21040100  | 2.11602200  | 0.04389700  |
| H | -0.62705200 | 2.45066500  | 0.39813700  |

Charge: 0 Multiplicity: 1

Single Point Energy (M06-2X/def2-TZVP, SMD: in toluene): -880.461912 Hartree

Enthalpy (calculated by Shermo 2.3.5): -880.2434323 Hartree

Gibbs Free Energy (calculated by Shermo 2.3.5): -880.3220981 Hartree

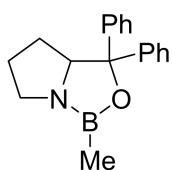

|   |            |             |             |
|---|------------|-------------|-------------|
| C | 0.83258600 | 3.26767300  | -0.04835100 |
| C | 2.12480500 | 3.55388000  | -0.87468700 |
| C | 2.93963000 | 2.24823800  | -0.81133900 |
| C | 1.84633900 | 1.18874700  | -0.62436000 |
| C | 2.20710100 | -0.13485100 | 0.11967200  |

|   |             |             |             |
|---|-------------|-------------|-------------|
| H | 0.77119100  | 3.87754000  | 0.85995000  |
| H | -0.06180900 | 3.47641700  | -0.65110900 |
| H | 1.86219300  | 3.78807600  | -1.91194800 |
| H | 3.55742500  | 2.08614400  | -1.69955100 |
| H | 3.60136900  | 2.23725900  | 0.06355500  |
| H | 2.68371900  | 4.40681800  | -0.47965400 |
| H | 1.36665700  | 0.97920700  | -1.58989400 |
| N | 0.91825900  | 1.84977300  | 0.30042500  |
| B | 1.12210200  | 1.29249900  | 1.59024600  |
| O | 1.90419900  | 0.15005500  | 1.50462900  |
| C | 3.68348800  | -0.49086400 | -0.01005400 |
| C | 4.53830900  | -0.41964100 | 1.08844900  |
| C | 4.20520600  | -0.86773700 | -1.24987200 |
| C | 5.89190100  | -0.71697000 | 0.94688600  |
| H | 4.13622300  | -0.13260000 | 2.05342000  |
| C | 5.55693200  | -1.15553700 | -1.39132600 |
| H | 3.54964400  | -0.94672300 | -2.11252400 |
| C | 6.40746700  | -1.08210600 | -0.29108100 |
| H | 6.54494600  | -0.66172700 | 1.81350100  |
| H | 5.94631300  | -1.44551000 | -2.36315500 |
| H | 7.46325800  | -1.31309400 | -0.39911800 |
| C | 1.34744300  | -1.32605100 | -0.31189600 |
| C | 0.93962700  | -1.52791600 | -1.63149200 |
| C | 1.01460300  | -2.29153300 | 0.64255300  |
| C | 0.20725700  | -2.65778300 | -1.98685800 |
| H | 1.18460300  | -0.80710100 | -2.40551600 |
| C | 0.28230600  | -3.41773600 | 0.28849500  |
| H | 1.32977900  | -2.14768900 | 1.67025900  |
| C | -0.12661500 | -3.60681200 | -1.02858100 |
| H | -0.10494900 | -2.79044500 | -3.01888700 |

|   |             |             |             |
|---|-------------|-------------|-------------|
| H | 0.02953200  | -4.15349800 | 1.04687200  |
| H | -0.70060800 | -4.48641000 | -1.30522600 |
| C | 0.62638000  | 1.84674200  | 2.96950700  |
| H | 0.38840200  | 1.03583100  | 3.66638700  |
| H | 1.41307000  | 2.44625800  | 3.44781200  |
| H | -0.25602100 | 2.48761100  | 2.87547600  |

Charge: 0 Multiplicity: 1

Single Point Energy (M06-2X/def2-TZVP, SMD: in toluene): -852.835012 Hartree

Enthalpy (calculated by Shermo 2.3.5): -852.4593543 Hartree

Gibbs Free Energy (calculated by Shermo 2.3.5): -852.5591904 Hartree

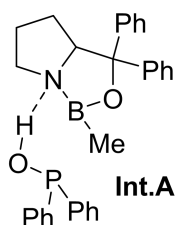

|   |             |             |            |
|---|-------------|-------------|------------|
| C | -4.50155500 | 8.89806000  | 1.42807400 |
| C | -3.34722700 | 9.93659200  | 1.44180200 |
| C | -3.95342100 | 11.19283600 | 2.08546900 |
| C | -4.95205800 | 10.59192400 | 3.07770400 |
| C | -6.19117600 | 11.44347100 | 3.48221500 |
| H | -4.90942800 | 8.74214800  | 0.42318000 |
| H | -4.16222400 | 7.92506800  | 1.80456800 |
| H | -2.51940800 | 9.56453500  | 2.05558600 |
| H | -3.20755100 | 11.83707100 | 2.55932200 |
| H | -4.49565600 | 11.79439200 | 1.34485700 |
| H | -2.95311900 | 10.12712300 | 0.43972000 |
| H | -4.41846900 | 10.22005400 | 3.96152400 |
| N | -5.54316200 | 9.47498700  | 2.30725300 |
| B | -6.81977900 | 9.94439700  | 1.82942700 |
| O | -7.17796200 | 11.10686900 | 2.47239200 |

|   |             |             |            |
|---|-------------|-------------|------------|
| C | -5.90306400 | 12.93725100 | 3.42786100 |
| C | -5.07058300 | 13.51712900 | 4.38805900 |
| C | -6.42728600 | 13.73718400 | 2.41414000 |
| C | -4.75659100 | 14.86902100 | 4.32694600 |
| H | -4.67676800 | 12.91135800 | 5.19957700 |
| C | -6.11922200 | 15.09461500 | 2.36055900 |
| H | -7.08154000 | 13.29437500 | 1.67143000 |
| C | -5.28105100 | 15.66477800 | 3.31151800 |
| H | -4.10780800 | 15.30493500 | 5.08130900 |
| H | -6.54037200 | 15.70795900 | 1.56881500 |
| H | -5.04236600 | 16.72343500 | 3.26771600 |
| C | -6.77892900 | 11.07183300 | 4.84447600 |
| C | -8.15596600 | 11.22249300 | 5.03411000 |
| C | -5.99866100 | 10.65330700 | 5.92288300 |
| C | -8.73591100 | 10.94198000 | 6.26372300 |
| H | -8.77249400 | 11.54958400 | 4.20394100 |
| C | -6.58063400 | 10.37700100 | 7.15775200 |
| H | -4.92581700 | 10.52116100 | 5.82131100 |
| C | -7.95073000 | 10.51598800 | 7.33143600 |
| H | -9.80942200 | 11.05384200 | 6.38752900 |
| H | -5.95892000 | 10.02176700 | 7.97465900 |
| H | -8.40418300 | 10.28466800 | 8.29089200 |
| P | -7.01138700 | 7.22409500  | 5.08134400 |
| C | -7.40625000 | 5.43180700  | 4.87597000 |
| C | -8.72060800 | 5.01054900  | 5.08647800 |
| C | -6.43390300 | 4.49167200  | 4.52409700 |
| C | -9.05631500 | 3.66340400  | 4.97384200 |
| H | -9.48852300 | 5.74243100  | 5.32947400 |
| C | -6.77363900 | 3.14998400  | 4.39677400 |
| H | -5.41264600 | 4.81862800  | 4.34954200 |

|   |              |            |             |
|---|--------------|------------|-------------|
| C | -8.08349900  | 2.73184400 | 4.62693500  |
| H | -10.08122100 | 3.34439600 | 5.14198900  |
| H | -6.01316800  | 2.42391100 | 4.12194100  |
| H | -8.34476900  | 1.68184300 | 4.52930600  |
| C | -6.21458100  | 7.11333200 | 6.74195300  |
| C | -7.02052000  | 6.90286500 | 7.86482400  |
| C | -4.84711100  | 7.32734800 | 6.91794500  |
| C | -6.46935900  | 6.90531000 | 9.14011800  |
| H | -8.09058000  | 6.74496500 | 7.74214200  |
| C | -4.29599400  | 7.33193000 | 8.19759900  |
| H | -4.21918000  | 7.49603000 | 6.04820600  |
| C | -5.10345600  | 7.12549700 | 9.31173200  |
| H | -7.10679600  | 6.73996600 | 10.00442700 |
| H | -3.22917300  | 7.49780200 | 8.32373500  |
| H | -4.67285800  | 7.13338600 | 10.30901400 |
| O | -5.65328100  | 7.35005600 | 4.13281500  |
| H | -5.75817400  | 8.10519700 | 3.50272500  |
| C | -7.69672300  | 9.29448500 | 0.71008100  |
| H | -7.37620400  | 9.64182600 | -0.28200600 |
| H | -7.61745900  | 8.20200000 | 0.70314700  |
| H | -8.75208200  | 9.56424200 | 0.81484000  |

Charge: 0 Multiplicity: 1

Single Point Energy (M06-2X/def2-TZVP, SMD: in toluene): -1733.318825 Hartree

Enthalpy (calculated by Sherma 2.3.5): -1732.7222116 Hartree

Gibbs Free Energy (calculated by Sherma 2.3.5): - 1732.8707964 Hartree

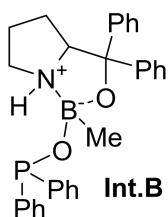



|   |             |             |             |
|---|-------------|-------------|-------------|
| C | -4.45915500 | 8.85960100  | 1.36212400  |
| C | -3.52801400 | 10.04914800 | 0.99416200  |
| C | -4.13015800 | 11.26365800 | 1.72225800  |
| C | -4.73994300 | 10.62024800 | 2.97212000  |
| C | -5.95806800 | 11.31036600 | 3.65692800  |
| H | -5.08037700 | 8.53244400  | 0.51528500  |
| H | -3.87509600 | 7.98539600  | 1.69380800  |
| H | -2.50882500 | 9.85546900  | 1.36365700  |
| H | -3.39302600 | 12.04546600 | 1.95102200  |
| H | -4.93019300 | 11.72824300 | 1.12430300  |
| H | -3.45553800 | 10.20117300 | -0.09238500 |
| H | -3.94475800 | 10.41247600 | 3.70342800  |
| N | -5.31328200 | 9.36897300  | 2.44539800  |
| B | -6.73693000 | 9.58115700  | 2.33156600  |
| O | -7.09286600 | 10.73422300 | 2.98583900  |
| C | -5.95982000 | 12.82236500 | 3.44912900  |
| C | -4.97515900 | 13.61764400 | 4.05280800  |
| C | -6.92093400 | 13.43384500 | 2.63725700  |
| C | -4.94552200 | 14.99596400 | 3.83907300  |
| H | -4.22932500 | 13.15945900 | 4.70483300  |
| C | -6.89594100 | 14.81676200 | 2.42928400  |
| H | -7.69095300 | 12.81716600 | 2.17454300  |
| C | -5.90794800 | 15.60226100 | 3.02526300  |
| H | -4.17064700 | 15.60098800 | 4.31611700  |
| H | -7.65648700 | 15.28078800 | 1.79631200  |
| H | -5.88862700 | 16.68237500 | 2.86182300  |
| C | -6.07559400 | 10.98728500 | 5.15239200  |
| C | -7.35576700 | 10.89232400 | 5.71726700  |
| C | -4.96312600 | 10.84835100 | 5.99144800  |
| C | -7.51658400 | 10.66895300 | 7.08434600  |

|   |             |             |             |
|---|-------------|-------------|-------------|
| H | -8.22604200 | 10.98369800 | 5.06794900  |
| C | -5.12471500 | 10.62561100 | 7.36201600  |
| H | -3.95084300 | 10.90780000 | 5.58859900  |
| C | -6.40136100 | 10.53781300 | 7.91469800  |
| H | -8.52130000 | 10.58170000 | 7.50346900  |
| H | -4.24368100 | 10.50296400 | 7.99583900  |
| H | -6.52804200 | 10.33653700 | 8.97982400  |
| P | -6.89883000 | 7.40973400  | 4.88200400  |
| C | -7.23129100 | 5.63038800  | 4.49852400  |
| C | -8.54694300 | 5.14811700  | 4.57337000  |
| C | -6.20618700 | 4.76227200  | 4.09766900  |
| C | -8.83012000 | 3.81255600  | 4.27947500  |
| H | -9.35896900 | 5.82294800  | 4.86087100  |
| C | -6.49198200 | 3.42849700  | 3.79417300  |
| H | -5.18656900 | 5.14684900  | 4.02958100  |
| C | -7.80197300 | 2.94905200  | 3.88814000  |
| H | -9.85770400 | 3.44601700  | 4.34653000  |
| H | -5.68619500 | 2.75721400  | 3.48511500  |
| H | -8.02320500 | 1.90543000  | 3.65110000  |
| C | -6.76701500 | 7.28845700  | 6.71650200  |
| C | -7.93686300 | 7.30883800  | 7.48937600  |
| C | -5.52302300 | 7.22773100  | 7.35670200  |
| C | -7.86622400 | 7.25031200  | 8.88240400  |
| H | -8.91219100 | 7.38334100  | 6.99962500  |
| C | -5.45269700 | 7.17445300  | 8.75083100  |
| H | -4.61663200 | 7.23626200  | 6.74958600  |
| C | -6.62162500 | 7.18474500  | 9.51730000  |
| H | -8.78414200 | 7.26543900  | 9.47562800  |
| H | -4.47770000 | 7.12751900  | 9.24329500  |
| H | -6.56410000 | 7.14504000  | 10.60795200 |

|   |             |            |            |
|---|-------------|------------|------------|
| O | -5.28597300 | 7.51094800 | 4.48865200 |
| H | -5.21162200 | 8.18180800 | 3.76361200 |
| C | -7.74584600 | 8.71242500 | 1.51045500 |
| H | -7.74126300 | 9.02543000 | 0.45020300 |
| H | -7.48576000 | 7.64304600 | 1.53652700 |
| H | -8.77267800 | 8.83042900 | 1.88572100 |

Charge: 0 Multiplicity: 1

Single Point Energy (M06-2X/def2-TZVP, SMD: in toluene): -1733.337197 Hartree

Enthalpy (calculated by Shermo 2.3.5): -1732.7396962 Hartree

Gibbs Free Energy (calculated by Shermo 2.3.5): -1732.8824688 Hartree

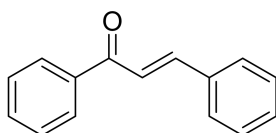

|   |             |             |             |
|---|-------------|-------------|-------------|
| C | -3.86509600 | -2.77650800 | -0.07873700 |
| C | -2.85214000 | -1.83143700 | -0.13907900 |
| C | -2.05567100 | -1.57211100 | 0.98258000  |
| C | -2.28265800 | -2.29394200 | 2.15978800  |
| C | -3.28638500 | -3.25505700 | 2.21253800  |
| C | -4.08452100 | -3.49180700 | 1.09774100  |
| H | -4.48585800 | -2.96176300 | -0.95056800 |
| H | -2.65429400 | -1.27410500 | -1.04928700 |
| H | -1.65716400 | -2.13559500 | 3.03272800  |
| H | -3.44494900 | -3.82122800 | 3.12570000  |
| H | -4.87438100 | -4.23623400 | 1.14304100  |
| C | -0.96625500 | -0.55529000 | 0.84948100  |
| O | -0.56886900 | -0.22467900 | -0.26325800 |
| C | -0.41110500 | 0.04355200  | 2.08176000  |
| C | 0.65255000  | 0.86471100  | 2.01557800  |
| H | -0.89616300 | -0.17490100 | 3.02757000  |

|   |             |            |            |
|---|-------------|------------|------------|
| H | 1.07242000  | 1.02961800 | 1.02285200 |
| C | 1.30907200  | 1.55591000 | 3.11346300 |
| C | 2.44361300  | 2.33367700 | 2.83188700 |
| C | 0.86432800  | 1.48708500 | 4.44507800 |
| C | 3.11319900  | 3.01497100 | 3.83968500 |
| H | 2.79726200  | 2.39728600 | 1.80596900 |
| C | 1.53274800  | 2.16811900 | 5.44929700 |
| H | -0.01350500 | 0.89917100 | 4.69492500 |
| C | 2.66038000  | 2.93444600 | 5.15252600 |
| H | 3.98931600  | 3.61032900 | 3.60041500 |
| H | 1.17492500  | 2.10555200 | 6.47291200 |
| H | 3.18047900  | 3.46642700 | 5.94364900 |

Charge: 0 Multiplicity: 1

Single Point Energy (M06-2X/def2-TZVP, SMD: in toluene): -653.995232 Hartree

Enthalpy (calculated by Shermo 2.3.5): -653.7477348 Hartree

Gibbs Free Energy (calculated by Shermo 2.3.5): -653.8305834 Hartree

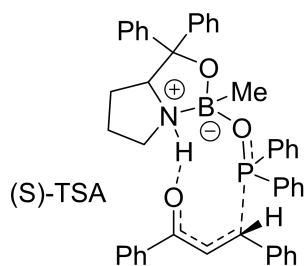

|   |             |             |             |
|---|-------------|-------------|-------------|
| C | -0.78298100 | -2.90273800 | -2.50532800 |
| C | -2.17745500 | -3.53548600 | -2.36356700 |
| C | -2.77227600 | -2.84471700 | -1.13458400 |
| C | -2.25659900 | -1.41636900 | -1.28024500 |
| C | -2.13682100 | -0.61193400 | 0.03282300  |
| H | -0.00128300 | -3.53994600 | -2.08862600 |
| H | -0.53362000 | -2.66791000 | -3.54476200 |
| H | -2.78428700 | -3.31599100 | -3.24944000 |

|   |             |             |             |
|---|-------------|-------------|-------------|
| H | -3.86344500 | -2.88597900 | -1.09548100 |
| H | -2.37990200 | -3.27994000 | -0.20790700 |
| H | -2.12389600 | -4.62265500 | -2.25682000 |
| H | -2.82371000 | -0.89386600 | -2.05843500 |
| N | -0.83469200 | -1.61332600 | -1.72630700 |
| B | 0.05311200  | -1.45431500 | -0.33174700 |
| O | -0.97951800 | -1.16122100 | 0.64256800  |
| C | -3.35794200 | -0.86398100 | 0.90988900  |
| C | -3.27188000 | -1.65815400 | 2.05056200  |
| C | -4.59317600 | -0.32249600 | 0.54624300  |
| C | -4.40907800 | -1.91225200 | 2.81426800  |
| H | -2.30808800 | -2.06938600 | 2.33116400  |
| C | -5.72849500 | -0.58627200 | 1.30250900  |
| H | -4.66097800 | 0.32326900  | -0.32642700 |
| C | -5.64000000 | -1.38336500 | 2.44172800  |
| H | -4.32986500 | -2.52812500 | 3.70603600  |
| H | -6.68364900 | -0.16022300 | 1.00849300  |
| H | -6.52548400 | -1.58367500 | 3.03817800  |
| C | -1.97866900 | 0.90253700  | -0.16354800 |
| C | -2.17328500 | 1.56958900  | -1.37190900 |
| C | -1.65709500 | 1.65341700  | 0.97253800  |
| C | -2.07250600 | 2.96123400  | -1.43973800 |
| H | -2.37821700 | 1.02979400  | -2.29061500 |
| C | -1.55588600 | 3.03484600  | 0.90703400  |
| H | -1.49063000 | 1.13451900  | 1.91241900  |
| C | -1.77676200 | 3.69743800  | -0.30063800 |
| H | -2.21815400 | 3.45874800  | -2.39521400 |
| H | -1.30887900 | 3.60040700  | 1.80122100  |
| H | -1.71100700 | 4.78096200  | -0.35049000 |
| C | 0.91279900  | -2.75101400 | 0.05683500  |

|   |             |             |             |
|---|-------------|-------------|-------------|
| H | 1.37817400  | -2.60600200 | 1.03828800  |
| H | 0.28178500  | -3.64517600 | 0.14087000  |
| H | 1.73024100  | -2.98577600 | -0.64024400 |
| H | -0.58825300 | -0.85820100 | -2.40716500 |
| O | 0.87703800  | -0.20042900 | -0.53644200 |
| P | 2.34507900  | -0.04175300 | -1.12965100 |
| C | 3.53612700  | -0.67459200 | 0.11739200  |
| C | 4.76854800  | -1.19513600 | -0.28224600 |
| C | 3.20856300  | -0.61543100 | 1.47591000  |
| C | 5.67400300  | -1.64513000 | 0.67588000  |
| H | 5.02321900  | -1.25284200 | -1.33738100 |
| C | 4.11353800  | -1.07360400 | 2.42441800  |
| H | 2.24482200  | -0.21453500 | 1.77994100  |
| C | 5.34694900  | -1.58801600 | 2.02630700  |
| H | 6.63278100  | -2.04778800 | 0.36187700  |
| H | 3.85830800  | -1.02705100 | 3.47942900  |
| H | 6.05137000  | -1.94557900 | 2.77198300  |
| C | 2.61902600  | 1.74584600  | -1.05953100 |
| C | 3.91870500  | 2.26476000  | -1.02518800 |
| C | 1.52651400  | 2.61082700  | -1.16306400 |
| C | 4.12013600  | 3.63806200  | -1.09068800 |
| H | 4.77104400  | 1.59639700  | -0.93092900 |
| C | 1.73714500  | 3.98541700  | -1.21669000 |
| H | 0.51700000  | 2.21263400  | -1.17927700 |
| C | 3.02893300  | 4.50059900  | -1.18831000 |
| H | 5.12970800  | 4.03708600  | -1.05211900 |
| H | 0.88002000  | 4.64877500  | -1.28869500 |
| H | 3.18852800  | 5.57446300  | -1.23207800 |
| C | 2.27182200  | -0.32377100 | -3.46611100 |
| C | 1.66475000  | 0.84815700  | -3.94163400 |

|   |             |             |             |
|---|-------------|-------------|-------------|
| H | 1.62196900  | -1.19886300 | -3.42905300 |
| C | 0.26222100  | 0.95269400  | -4.08515000 |
| O | -0.53714700 | -0.00006400 | -3.84972400 |
| C | -0.33635400 | 2.23984600  | -4.56074300 |
| C | -0.31808700 | 4.64852700  | -4.82676300 |
| C | -1.63910200 | 2.21691800  | -5.07329700 |
| C | 0.31754700  | 3.47206600  | -4.44620700 |
| H | 2.28195200  | 1.70083400  | -4.19487800 |
| C | -2.26834700 | 3.39048500  | -5.46691600 |
| H | -2.14306000 | 1.25867400  | -5.15069800 |
| C | -1.61186200 | 4.61317600  | -5.34004100 |
| H | 1.31226300  | 3.52391700  | -4.01649400 |
| H | 4.38916600  | 1.39953200  | -3.79167900 |
| H | -3.27680100 | 3.35503700  | -5.86984500 |
| C | 3.69399400  | -0.64189600 | -3.71591300 |
| C | 6.00593000  | 0.01194500  | -4.03225900 |
| C | 4.67065900  | 0.35272800  | -3.85080400 |
| C | 4.09255000  | -1.98268600 | -3.79030600 |
| H | -2.10697300 | 5.53327600  | -5.63765000 |
| C | 5.42540600  | -2.32260600 | -3.98433800 |
| H | 3.34332400  | -2.76431900 | -3.68535700 |
| C | 6.39087100  | -1.32507700 | -4.09790200 |
| H | 6.75165000  | 0.79650600  | -4.12568100 |
| H | 0.19757500  | 5.59851200  | -4.71560300 |
| H | 5.71276400  | -3.36858300 | -4.04258800 |
| H | 7.43457900  | -1.58735500 | -4.24363400 |

Charge: 0 Multiplicity: 1

Single Point Energy (M06-2X/def2-TZVP, SMD: in toluene): -2387.352682 Hartree

Enthalpy (calculated by Shermo 2.3.5): -2386.5065199 Hartree

Gibbs Free Energy (calculated by Shermo 2.3.5): -2386.6925394 Hartree

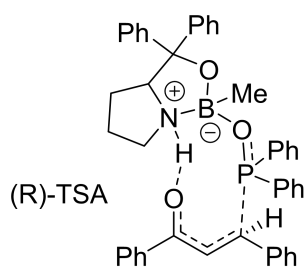

|   |             |             |             |
|---|-------------|-------------|-------------|
| B | -0.24084500 | -1.30026900 | 0.23081400  |
| N | -1.02541500 | -1.82718900 | -1.09275800 |
| O | -0.43880600 | 0.14359300  | 0.11289100  |
| C | -0.74144400 | -2.01108900 | 1.58412600  |
| O | 1.21971200  | -1.60925700 | 0.07560600  |
| C | -1.97722500 | -2.98281000 | -1.02189400 |
| C | -1.77372600 | -0.65184900 | -1.68192500 |
| H | -0.32840600 | -2.11325400 | -1.82402400 |
| C | -1.51245200 | 0.55464400  | -0.70245600 |
| H | -0.22709100 | -1.57516300 | 2.45001100  |
| H | -1.81644800 | -1.89425700 | 1.76761600  |
| H | -0.51411600 | -3.08502400 | 1.59504400  |
| P | 2.29386700  | -0.66132500 | -0.64350200 |
| C | -2.98383700 | -2.68021600 | -2.12489100 |
| H | -1.41902200 | -3.91240600 | -1.16131800 |
| H | -2.46159200 | -2.99356200 | -0.04147500 |
| C | -3.19138900 | -1.17344900 | -1.94139000 |
| H | -1.28532400 | -0.42503800 | -2.63646200 |
| C | -2.72575000 | 0.94839300  | 0.15754800  |
| C | -1.08005300 | 1.81520100  | -1.45513400 |
| C | 2.62699000  | 0.76211000  | 0.45665700  |
| C | 3.79238700  | -1.67565100 | -0.57568100 |
| H | -2.54266700 | -2.90194600 | -3.10360400 |
| H | -3.90935300 | -3.25371600 | -2.01636600 |



|   |             |             |             |
|---|-------------|-------------|-------------|
| H | -3.65597700 | -0.69006400 | -2.80619400 |
| H | -3.83099500 | -0.99116900 | -1.07161200 |
| C | -2.66089500 | 0.85613200  | 1.54589200  |
| C | -3.88586300 | 1.46956300  | -0.42415200 |
| C | -1.56807500 | 2.13411000  | -2.72331300 |
| C | -0.22045200 | 2.71385100  | -0.81838800 |
| C | 2.14590100  | 0.76389500  | 1.76911300  |
| C | 3.29721600  | 1.88654600  | -0.03660200 |
| C | 3.67374100  | -3.05594200 | -0.78429600 |
| C | 5.06403100  | -1.09876900 | -0.49250800 |
| C | -3.74330300 | 1.24227400  | 2.33401600  |
| H | -1.74989200 | 0.49252200  | 2.00587900  |
| C | -4.96706400 | 1.85069900  | 0.35957300  |
| H | -3.94516100 | 1.59121700  | -1.50217100 |
| C | -1.21200200 | 3.33107400  | -3.34192700 |
| H | -2.23517300 | 1.45343600  | -3.24697500 |
| C | 0.13759300  | 3.90506700  | -1.43703300 |
| H | 0.17192500  | 2.46522600  | 0.16242300  |
| C | 2.33823900  | 1.87688200  | 2.57808500  |
| H | 1.61505800  | -0.10350200 | 2.14777100  |
| C | 3.49378400  | 2.99411000  | 0.78263500  |
| H | 3.65328200  | 1.91042400  | -1.06231800 |
| C | 4.81467500  | -3.84496800 | -0.89072000 |
| H | 2.68942300  | -3.51038900 | -0.83945600 |
| C | 6.19949100  | -1.89306500 | -0.60438900 |
| H | 5.16795800  | -0.03023700 | -0.32528100 |
| C | -4.90224000 | 1.73376700  | 1.74624800  |
| H | -3.67282500 | 1.16236400  | 3.41534300  |
| H | -5.85998600 | 2.25006700  | -0.11310300 |
| C | -0.36135500 | 4.22293400  | -2.69813400 |

|   |             |             |             |
|---|-------------|-------------|-------------|
| H | -1.59867700 | 3.56128700  | -4.33065900 |
| H | 0.81641500  | 4.58547500  | -0.93020900 |
| C | 3.01063000  | 2.99477900  | 2.08746600  |
| H | 1.96090800  | 1.87246000  | 3.59685800  |
| H | 4.01640300  | 3.86247300  | 0.39113600  |
| C | 6.07740300  | -3.26615700 | -0.80743100 |
| H | 4.71185200  | -4.91558200 | -1.04437900 |
| H | 7.18308600  | -1.43919200 | -0.52337400 |
| H | -5.74512000 | 2.03599900  | 2.36106200  |
| H | -0.08517800 | 5.15745400  | -3.17856500 |
| H | 3.15461800  | 3.86465900  | 2.72204800  |
| H | 6.96670000  | -3.88459200 | -0.89104600 |
| O | 0.28456600  | -2.81512400 | -3.19361900 |
| C | 1.49459000  | -2.92245700 | -3.55327300 |
| C | 2.42317800  | -1.86193900 | -3.48159600 |
| C | 1.92837100  | -4.24256400 | -4.10898800 |
| C | 2.06025800  | -0.58767600 | -3.02688800 |
| H | 3.44356900  | -2.03641700 | -3.79670800 |
| C | 3.26969400  | -4.63951500 | -4.17944400 |
| C | 0.94199700  | -5.13509800 | -4.54541800 |
| C | 2.89778800  | 0.59868700  | -3.29469900 |
| H | 0.99234900  | -0.37778400 | -2.98321500 |
| C | 3.61218000  | -5.88968700 | -4.68160100 |
| H | 4.05417600  | -3.98528300 | -3.81326000 |
| C | 1.28592900  | -6.37810700 | -5.05938400 |
| H | -0.09595800 | -4.82648100 | -4.47424600 |
| C | 4.29172800  | 0.51624800  | -3.41756800 |
| C | 2.28796100  | 1.85413400  | -3.40822500 |
| C | 2.62326500  | -6.76140400 | -5.12929800 |
| H | 4.65678900  | -6.18598300 | -4.72060200 |

|   |            |             |             |
|---|------------|-------------|-------------|
| H | 0.50884700 | -7.05409900 | -5.40543600 |
| C | 5.04994100 | 1.66074900  | -3.63359400 |
| H | 4.79076100 | -0.44308900 | -3.32254200 |
| C | 3.04686700 | 2.99486900  | -3.63592400 |
| H | 1.20942800 | 1.93565300  | -3.30228900 |
| H | 2.89324400 | -7.73612600 | -5.52580200 |
| C | 4.43241700 | 2.90513800  | -3.74309800 |
| H | 6.13019700 | 1.58060200  | -3.71787300 |
| H | 2.55083800 | 3.95749300  | -3.71945800 |
| H | 5.02790700 | 3.79715500  | -3.91493800 |

Charge: 0 Multiplicity: 1

Single Point Energy (M06-2X/def2-TZVP, SMD: in toluene): -2387.3503 Hartree

Enthalpy (calculated by Shermo 2.3.5): -2386.5039399 Hartree

Gibbs Free Energy (calculated by Shermo 2.3.5): -2386.6925394 Hartree

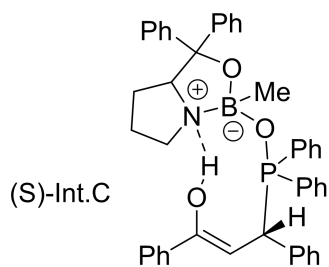

|   |             |             |             |
|---|-------------|-------------|-------------|
| C | -0.46812600 | -1.76575400 | -2.95758600 |
| C | -1.91824500 | -2.16287500 | -3.27554900 |
| C | -2.62263900 | -2.07331000 | -1.92061300 |
| C | -1.98119400 | -0.83105800 | -1.30692800 |
| C | -1.98900500 | -0.74744000 | 0.23813800  |
| H | 0.16532700  | -2.64342400 | -2.80976300 |
| H | -0.01604200 | -1.13905300 | -3.73366000 |
| H | -2.36238400 | -1.44820100 | -3.97812200 |
| H | -3.70909000 | -1.98451400 | -1.99634400 |
| H | -2.39556300 | -2.94764700 | -1.29857600 |

|   |             |             |             |
|---|-------------|-------------|-------------|
| H | -1.98099000 | -3.15729600 | -3.72636400 |
| H | -2.39764900 | 0.06551700  | -1.78038600 |
| N | -0.53406800 | -0.98154300 | -1.67295100 |
| B | 0.16915400  | -1.57195400 | -0.32685000 |
| O | -0.91332700 | -1.59025200 | 0.62422400  |
| C | -3.30257900 | -1.30274100 | 0.77813500  |
| C | -3.35981700 | -2.55315800 | 1.38790400  |
| C | -4.47747400 | -0.56283000 | 0.62532000  |
| C | -4.57878400 | -3.05922000 | 1.83425400  |
| H | -2.44245000 | -3.11884800 | 1.51227600  |
| C | -5.69397900 | -1.07373300 | 1.06038500  |
| H | -4.43394200 | 0.42747100  | 0.17715400  |
| C | -5.74872000 | -2.32620100 | 1.66825800  |
| H | -4.61162600 | -4.03289100 | 2.31557700  |
| H | -6.60079600 | -0.48876900 | 0.93494900  |
| H | -6.69793400 | -2.72309600 | 2.01667900  |
| C | -1.78474300 | 0.66072300  | 0.80962800  |
| C | -1.73774000 | 1.82702200  | 0.05089100  |
| C | -1.68125200 | 0.76079500  | 2.20194300  |
| C | -1.62637700 | 3.07147900  | 0.67071700  |
| H | -1.75385900 | 1.79425100  | -1.03241400 |
| C | -1.56970400 | 1.99766600  | 2.82009000  |
| H | -1.70375800 | -0.14861300 | 2.79613200  |
| C | -1.55883300 | 3.16323300  | 2.05391500  |
| H | -1.57853900 | 3.96790400  | 0.05916200  |
| H | -1.50368300 | 2.05582500  | 3.90309400  |
| H | -1.48834300 | 4.13459500  | 2.53592200  |
| C | 0.84742000  | -3.02235200 | -0.44127500 |
| H | 1.10941600  | -3.37448400 | 0.56400100  |
| H | 0.13952900  | -3.76056400 | -0.83976700 |

|   |             |             |             |
|---|-------------|-------------|-------------|
| H | 1.75870700  | -3.08471400 | -1.04886000 |
| H | -0.09079900 | -0.01534000 | -1.86703600 |
| O | 1.18377200  | -0.48456800 | 0.10318400  |
| P | 2.47236000  | 0.17157800  | -0.47752200 |
| C | 3.81920700  | -0.43473800 | 0.59177900  |
| C | 5.07383600  | 0.18388900  | 0.57788600  |
| C | 3.60966700  | -1.54896100 | 1.40517100  |
| C | 6.11205100  | -0.32996100 | 1.34180700  |
| H | 5.24287500  | 1.06726300  | -0.03028000 |
| C | 4.65225200  | -2.05574600 | 2.17555600  |
| H | 2.62835100  | -2.00777600 | 1.44345200  |
| C | 5.90574800  | -1.45569300 | 2.13649500  |
| H | 7.08525900  | 0.15123200  | 1.31826900  |
| H | 4.48011900  | -2.92086000 | 2.80934500  |
| H | 6.72018000  | -1.85573600 | 2.73378100  |
| C | 2.49039700  | 1.95244700  | -0.20451000 |
| C | 3.31722000  | 2.79092500  | -0.95585500 |
| C | 1.73017800  | 2.46525700  | 0.84781700  |
| C | 3.37021100  | 4.14836400  | -0.65896100 |
| H | 3.88311200  | 2.39605900  | -1.79214500 |
| C | 1.80290300  | 3.82051400  | 1.14286200  |
| H | 1.07272000  | 1.81424200  | 1.41737300  |
| C | 2.61929700  | 4.66291000  | 0.39291200  |
| H | 3.99762600  | 4.80382500  | -1.25562100 |
| H | 1.20782900  | 4.21850300  | 1.95886000  |
| H | 2.66709600  | 5.72274800  | 0.62649900  |
| C | 2.89905900  | -0.36259500 | -2.25560400 |
| C | 2.51324000  | 0.63278100  | -3.30521200 |
| H | 3.14584600  | 0.67492200  | -4.18241000 |
| C | 1.38210400  | 1.39092100  | -3.19577500 |

|   |             |             |             |
|---|-------------|-------------|-------------|
| O | 0.59213100  | 1.29066100  | -2.16296100 |
| C | 1.00911200  | 2.39655900  | -4.23392800 |
| C | 1.88490000  | 2.82189100  | -5.24183400 |
| C | -0.27195600 | 2.95757300  | -4.19158900 |
| C | 1.48417700  | 3.75900200  | -6.18512500 |
| H | 2.89682500  | 2.43079500  | -5.28242000 |
| C | -0.67420900 | 3.89579900  | -5.13557000 |
| H | -0.94006900 | 2.64556600  | -3.39547200 |
| C | 0.20027000  | 4.29953000  | -6.13949000 |
| H | 2.18027400  | 4.07751400  | -6.95636200 |
| H | -1.67475700 | 4.31711000  | -5.08528900 |
| H | -0.11040900 | 5.03476100  | -6.87634900 |
| C | 4.34386000  | -0.81560600 | -2.34908100 |
| C | 5.35211400  | 0.04884600  | -2.77997500 |
| C | 4.70055800  | -2.11030000 | -1.96459100 |
| C | 6.68026100  | -0.36400300 | -2.80950700 |
| H | 5.09618800  | 1.05562500  | -3.09723200 |
| C | 6.02622200  | -2.52499400 | -1.98887000 |
| H | 3.93196800  | -2.79853500 | -1.62239600 |
| C | 7.02436700  | -1.65042000 | -2.40813100 |
| H | 7.44908400  | 0.32475900  | -3.14841400 |
| H | 6.27940200  | -3.53435900 | -1.67801200 |
| H | 8.06154700  | -1.97196400 | -2.42801400 |
| H | 2.27529000  | -1.27362900 | -2.30558900 |

Charge: 0 Multiplicity: 1

Single Point Energy (M06-2X/def2-TZVP, SMD: in toluene): -2387.361988 Hartree

Enthalpy (calculated by Shermo 2.3.5): -2386.5168414 Hartree

Gibbs Free Energy (calculated by Shermo 2.3.5): -2386.7008379 Hartree

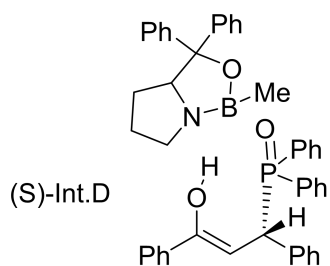

|   |             |             |             |
|---|-------------|-------------|-------------|
| C | -2.44772900 | -2.02060900 | -3.17387500 |
| C | -3.37284900 | -0.77917200 | -3.12488100 |
| C | -3.57073100 | -0.50783200 | -1.62259400 |
| C | -2.18127400 | -0.84226600 | -1.08256300 |
| C | -1.94460400 | -1.32012000 | 0.39300000  |
| H | -3.02846000 | -2.94332500 | -3.31304700 |
| H | -1.72375700 | -1.94678100 | -3.99684800 |
| H | -2.86795400 | 0.07714500  | -3.58843700 |
| H | -3.88960000 | 0.51896100  | -1.41408900 |
| H | -4.31547700 | -1.19245600 | -1.20152100 |
| H | -4.31483600 | -0.93871300 | -3.65797700 |
| H | -1.48878700 | -0.00939700 | -1.28901600 |
| N | -1.79790000 | -2.01299900 | -1.86831500 |
| B | -1.07224200 | -2.91116600 | -1.07116800 |
| O | -1.07603300 | -2.47568900 | 0.25602300  |
| C | -3.24902900 | -1.76936400 | 1.05200200  |
| C | -3.64843100 | -3.10531900 | 1.00342400  |
| C | -4.10133800 | -0.83716000 | 1.64968400  |
| C | -4.87493900 | -3.49786200 | 1.53431500  |
| H | -2.98940500 | -3.84427000 | 0.56127100  |
| C | -5.32595000 | -1.22856500 | 2.17744400  |
| H | -3.80059500 | 0.20484000  | 1.70993100  |
| C | -5.71986400 | -2.56281400 | 2.12091800  |
| H | -5.16707400 | -4.54358300 | 1.49077600  |
| H | -5.97169600 | -0.48881900 | 2.64246500  |

|   |             |             |             |
|---|-------------|-------------|-------------|
| H | -6.67436500 | -2.87084100 | 2.53809100  |
| C | -1.24198200 | -0.28570700 | 1.25392400  |
| C | -1.41585700 | 1.08335900  | 1.05101400  |
| C | -0.44128400 | -0.70977600 | 2.31548700  |
| C | -0.79884600 | 2.01002500  | 1.88671000  |
| H | -2.03283800 | 1.44084900  | 0.23071800  |
| C | 0.18927000  | 0.21387400  | 3.14059500  |
| H | -0.30968400 | -1.77342300 | 2.48359200  |
| C | 0.01144500  | 1.57865800  | 2.93038100  |
| H | -0.93602500 | 3.07232700  | 1.70586300  |
| H | 0.82301000  | -0.13511800 | 3.95144700  |
| H | 0.50509100  | 2.30204200  | 3.57324100  |
| C | -0.33908400 | -4.22887800 | -1.49891600 |
| H | -0.36584500 | -4.99569000 | -0.71677300 |
| H | -0.74728200 | -4.65704000 | -2.42095700 |
| H | 0.71948100  | -4.00971500 | -1.69562500 |
| H | 0.79741300  | -0.90905900 | -2.92130300 |
| O | 0.92439300  | -0.71022900 | -1.29313500 |
| P | 2.23640000  | -0.04270700 | -0.92929000 |
| C | 3.09365900  | -0.94543100 | 0.39051700  |
| C | 4.37971500  | -0.63184400 | 0.84921400  |
| C | 2.40419300  | -2.03268300 | 0.93722700  |
| C | 4.96170300  | -1.39943100 | 1.85154900  |
| H | 4.93476900  | 0.19767100  | 0.42168200  |
| C | 2.99554200  | -2.79367700 | 1.94020700  |
| H | 1.40355200  | -2.26332500 | 0.58110200  |
| C | 4.27119500  | -2.47877200 | 2.39794200  |
| H | 5.96003600  | -1.15497600 | 2.20258400  |
| H | 2.45404100  | -3.63487900 | 2.36346200  |
| H | 4.73129500  | -3.07622400 | 3.18018700  |



|   |             |             |             |
|---|-------------|-------------|-------------|
| C | 2.01395700  | 1.68755900  | -0.42832900 |
| C | 2.66225300  | 2.26487800  | 0.66432900  |
| C | 1.13843500  | 2.46047200  | -1.20238900 |
| C | 2.46264600  | 3.60888100  | 0.96248300  |
| H | 3.30859500  | 1.66491100  | 1.29648400  |
| C | 0.94665400  | 3.80348000  | -0.90190300 |
| H | 0.60601000  | 2.00408100  | -2.03142800 |
| C | 1.61385200  | 4.38082800  | 0.17592000  |
| H | 2.96659400  | 4.05049800  | 1.81731700  |
| H | 0.27004600  | 4.39896600  | -1.50797900 |
| H | 1.46147200  | 5.43098100  | 0.40960500  |
| C | 3.29477600  | -0.06084600 | -2.47754800 |
| C | 2.61156200  | 0.69084100  | -3.58726500 |
| H | 3.07335300  | 1.62220200  | -3.89302300 |
| C | 1.51358100  | 0.27789400  | -4.26205300 |
| O | 0.75981900  | -0.78962300 | -3.91192500 |
| C | 1.01183100  | 0.97723200  | -5.46268900 |
| C | 1.85275900  | 1.74649900  | -6.27818600 |
| C | -0.34087100 | 0.86888400  | -5.80909400 |
| C | 1.34654400  | 2.41539200  | -7.38422400 |
| H | 2.91552400  | 1.79584100  | -6.06118200 |
| C | -0.84356900 | 1.53554500  | -6.91998800 |
| H | -0.98983700 | 0.25553400  | -5.19376900 |
| C | -0.00483900 | 2.31650000  | -7.70903100 |
| H | 2.01379800  | 3.00289600  | -8.00850700 |
| H | -1.89649100 | 1.44268800  | -7.17140400 |
| H | -0.39675300 | 2.83422900  | -8.57975300 |
| C | 4.70965600  | 0.39032200  | -2.22934700 |
| C | 5.00630200  | 1.73635500  | -1.99195000 |
| C | 5.74647300  | -0.54407600 | -2.18374400 |

|   |            |             |             |
|---|------------|-------------|-------------|
| C | 6.30686000 | 2.13195100  | -1.69843200 |
| H | 4.21167700 | 2.47739500  | -2.01908400 |
| C | 7.04827700 | -0.14844000 | -1.89498900 |
| H | 5.52693400 | -1.59353300 | -2.36369100 |
| C | 7.33204100 | 1.19079300  | -1.64522300 |
| H | 6.51944500 | 3.18037300  | -1.50956200 |
| H | 7.84193000 | -0.88935400 | -1.86372100 |
| H | 8.34746400 | 1.50141100  | -1.41717100 |
| H | 3.29448900 | -1.13793700 | -2.71318100 |

Charge: 0 Multiplicity: 1

Single Point Energy (M06-2X/def2-TZVP, SMD: in toluene): -2387.369886 Hartree

Enthalpy (calculated by Sermo 2.3.5): -2386.5223241 Hartree

Gibbs Free Energy (calculated by Sermo 2.3.5): -2386.7146314 Hartree

**The  $\pi$  -  $\pi$  interactions between CBS and diphenylphosphine oxide<sup>17</sup>**

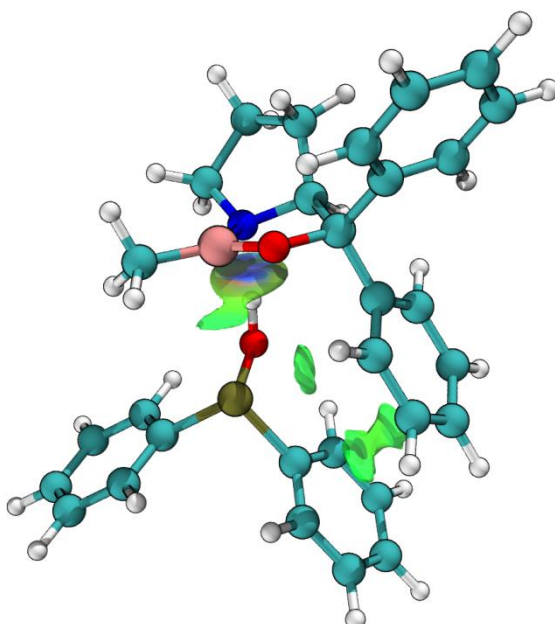

Scheme S5. The  $\pi$ - $\pi$  interactions between CBS and diphenylphosphine oxide

## 7. References

1. S. Jones, D. Valette, Enantioselective synthesis of allylic alcohols via an oxazaborolidinium ion catalyzed Diels-Alder/Retro-Diels-Alder sequence. *Org. Lett.* **2009**, *11*, 5358-5361.
2. X. Hao, J. Huang, T. Wang, J. Lv, J. Gong & M. Song, PCN pincer palladium (II) complex catalyzed enantioselective hydrophosphination of enones: synthesis of pyridine-functionalized chiral phosphine oxides as NCsp<sup>3</sup>O pincer preligands. *J. Org. Chem.* **2014**, *79*, 9512-9530.
3. A. Russo, A. Lattanzi, Asymmetric organocatalytic conjugate addition of diarylphosphane oxides to chalcones. 2010, Wiley Online Library.
4. Y. Liu, C. Wang, Y. Tong, Y. Ling, C. Zhou, B. Xiong, Cascade reaction of  $\alpha,\beta$ -unsaturated ketones and 2-aminoaryl alcohols for the synthesis of 3-acylquinolines by a copper nanocatalyst. *Adv. Synth. Catal.* **2021**, *363*, 4422-4429.
5. J. Humbrías-Martín, M. C. Pérez-Aguilar, R. Mas-Ballesté, A. D. Litta, A. Lattanzi, G. D. Sala, J. A. Fernández-Salas, J. Alemán, Enantioselective conjugate azidation of  $\alpha,\beta$ -unsaturated ketones under bifunctional organocatalysis by direct activation of TMSN<sub>3</sub>. *Adv. Synth. Catal.* **2019**, *361*, 4790-4796.
6. C. Wu, G. Yue, C. D. Nielsen, K. Xu, H. Hirao, J. Zhou, Asymmetric conjugate addition of organoboron reagents to common enones using copper catalysts. *J. Am. Chem. Soc.* **2016**, *138*, 742-745.
7. X. Wei, C. Bai, L. Zhao, P. Zhang, Z. Li, Y. Wang, Q. Su, Lewis acid enables ketone phosphorylation: synthesis of alkenyl phosphonates. *Chin. J. Chem.* **2021**, *39*, 1855-1860.
8. J. Feng, X. Chen, M. Shi, W. Duan, Palladium-catalyzed asymmetric addition of diarylphosphines to enones toward the synthesis of chiral phosphines. *J. Am. Chem. Soc.* **2010**, *132*, 5562-5563.
9. a) F. Neese, "Software update: the ORCA program system, version 4.0" *WIREs Comput. Mol. Sci.* **2017**, *8*, 1327.  
b) F. Neese, "The ORCA program system" *WIREs Comput. Mol. Sci.* **2012**, *2*, 73-78.
10. S. Grimme, A. Hansen, S. Ehlert, J. M. Mewes, *J. Chem. Phys.* **2021**, *154*, 064103.
11. A. V. Marenich, C. J. Cramer, D. G. Truhlar, Universal Solvation Model Based on Solute Electron Density and on a Continuum Model of the Solvent Defined by the Bulk Dielectric Constant and Atomic Surface Tensions. *J. Phys. Chem. B* **2009**, *113*, 6378-6396.
12. T. Lu, Q. Chen, Shermo: A general code for calculating molecular thermochemistry properties, *Comput. Theor. Chem.* **2021**, *1200*, 113249.

13. a) Y. Zhao, D. G. Truhlar, The M06 suite of density functionals for main group thermochemistry, thermochemical kinetics, noncovalent interactions, excited states, and transition elements: two new functionals and systematic testing of four M06-class functionals and 12 other functionals. *Theor. Chem. Acc.* **2008**, *120*, 215-241 b) F. Weigend, R. Ahlrichs, Balanced basis sets of split valence, triple zeta valence and quadruple zeta valence quality for H to Rn: Design and assessment of accuracy. *Phys. Chem. Chem. Phys.* **2005**, *7*, 3297-3305. c) F. Neese, F. Wennmohs, A. Hansen, U. Becker, Efficient, approximate and parallel Hartree-Fock and hybrid DFT calculations. A 'chain-of-spheres' algorithm for the Hartree-Fock exchange. *Chem. Phys.* **2009**, *356*, 98-109. d) S. Ehlert, U. Huniar, J. Ning, J. W. Furness, J. Sun, A. D. Kaplan, J. P. Perdew, J. G. Brandenburg, *J. Chem. Phys.* **2021**, *154*, 061101. e) S. Grimme, S. Ehrlich, L. Goerigk, Effect of the damping function in dispersion corrected density functional theory. *J. Comput. Chem.* **2011**, *32*, 1456-1465. f) S. Grimme, J. Antony, S. Ehrlich, H. Krieg, *J. Chem. Phys.*, **2010**, *132*, 154104.
14. CYLview20, C. Y. Legault, Université de Sherbrooke, 2020 (<http://www.cylview.org>)
15. a) J. Zhang, M. Dolg, ABCluster: The Artificial Bee Colony Algorithm for Cluster Global Optimization. *Phys. Chem. Chem. Phys.* **2015**, *17*, 24173-24181. b) J. Zhang, M. Dolg, Global Optimization of Rigid Molecular Clusters by the Artificial Bee Colony Algorithm. *Phys. Chem. Chem. Phys.*, **2016**, *18*, 3003-3010.
16. C. Bannwarth, S. Ehlert, S. Grimme, GFN2-xTB-An Accurate and Broadly Parametrized Self-Consistent Tight-Binding Quantum Chemical Method with Multipole Electrostatics and Density-Dependent Dispersion Contributions. *J. Chem. Theory Comput.* **2019**, *15*, 1652-1671.
17. T. Lu, Q. Chen, Independent gradient model based on Hirshfeld partition: A new method for visual study of interactions in chemical systems. *J. Comput. Chem.* **2022**, *43*, 539-555.
